# Supplementary material for: Ability of bifidobacteria to metabolize chitin-glucan and its impact on the gut microbiota
Source: PubMed Central journal article supplement (PMC6453949; doi:10.1038/s41598-019-42257-z), 2019-04-08
Supplement: 41598_2019_42257_MOESM1_ESM.pdf [file 41598_2019_42257_MOESM1_ESM.pdf]

1 **Ability of bifidobacteria to metabolize chitin-glucan and its impact on the gut microbiota**

2 **Key words:** Bifidobacterium, prebiotics, gut microbiota, microbe-microbe interactions

3 **Running title:** Bifidobacteria and chitin glucan

4

5 Giulia Alessandri<sup>1#</sup>, Christian Milani<sup>2#</sup>, Sabrina Duranti<sup>2#</sup>, Leonardo Mancabelli<sup>2</sup>, Thibaut  
6 Ranjanoro<sup>3</sup>, Salvatore Modica<sup>3</sup>, Luca Carnevali<sup>4</sup>, Rosario Statello<sup>4</sup>, Francesca Bottacini<sup>5</sup>,  
7 Francesca Turrone<sup>2</sup>, Maria Cristina Ossiprandi<sup>1</sup>, Andrea Sgoifo<sup>4</sup>, Dowue van Sinderen<sup>5</sup> and  
8 Marco Ventura<sup>1</sup>

9 # These authors contributed equally

10

11 Department of Veterinary Medical Science, University of Parma, Parma, Italy<sup>1</sup>; Laboratory of  
12 Probiogenomics, Department of Chemistry, Life Sciences, and Environmental Sustainability,  
13 University of Parma, Parma, Italy<sup>2</sup>; KitoZyme, Belgium<sup>3</sup>; Stress Physiology Laboratory,  
14 Department of Chemistry, Life Sciences and Environmental Sustainability, University of Parma,  
15 Parma, Italy<sup>4</sup>; APC Microbiome Institute and School of Microbiology, Bioscience Institute,  
16 National University of Ireland, Cork, Ireland<sup>5</sup>

17

18

19 Correspondence. Mailing address for Marco Ventura; Laboratory of Probiogenomics, Department  
20 of Chemistry, Life Sciences, and Environmental Sustainability, University of Parma, Parco Area  
21 delle Scienze 11a, 43124 Parma, Italy. Phone: ++39-521-905666. Fax: ++39-521-905604. E-mail:  
22 marco.ventura@unipr.it

Supplementary File 1

**Absolute variation (%) at phylum level**

|                                     |                           | CG     |         |        | Breve2L |        |        | CG+Breve2L |         |        |
|-------------------------------------|---------------------------|--------|---------|--------|---------|--------|--------|------------|---------|--------|
|                                     |                           | T1-T0  | T2-T0   | T3-T0  | T1-T0   | T2-T0  | T3-T0  | T1-T0      | T2-T0   | T3-T0  |
| D_0__Archaea;D_1__Euryarchaeota     | Euryarchaeota             | 0.00%  | 0.00%   | 0.00%  |         | 0.00%  |        | 0.00%      | 0.00%   | 0.00%  |
| D_0__Bacteria;D_1__Actinobacteria   | Actinobacteria            | 0.02%  | -0.07%  | 0.11%  | 0.02%   | 0.09%  | 0.06%  | 0.00%      | -0.08%  | 0.02%  |
| D_0__Bacteria;D_1__Bacteroidetes    | Bacteroidetes             | 10.26% | 16.94%  | 1.52%  | 0.72%   | 0.29%  | -0.25% | 13.33%     | 22.01%  | 0.59%  |
| D_0__Bacteria;D_1__Chloroflexi      | Chloroflexi               | -0.01% | -0.01%  | -0.01% |         |        |        |            |         |        |
| D_0__Bacteria;D_1__Cyanobacteria    | Cyanobacteria             | 0.00%  | 0.08%   | 0.13%  | 0.01%   | 0.18%  | 0.23%  | 0.10%      | 0.28%   | 0.08%  |
| D_0__Bacteria;D_1__Deferribacteres  | Deferribacteres           | 0.00%  | 0.00%   | 0.00%  | 0.00%   | 0.00%  | 0.00%  | 0.00%      | 0.00%   | 0.00%  |
| D_0__Bacteria;D_1__Firmicutes       | Firmicutes                | -8.27% | -14.66% | -2.75% | 0.39%   | -0.52% | 1.56%  | -9.05%     | -18.45% | 1.03%  |
| D_0__Bacteria;D_1__Fusobacteria     | Fusobacteria              | -0.02% | -0.02%  | 0.01%  | -0.01%  | 0.00%  | 0.02%  | 0.01%      | 0.01%   | 0.02%  |
| D_0__Bacteria;D_1__Proteobacteria   | Proteobacteria            | -0.97% | -0.23%  | -0.21% | -0.10%  | -0.14% | 0.02%  | -1.87%     | -1.38%  | 0.29%  |
| D_0__Bacteria;D_1__Saccharibacteria | Saccharibacteria          | 0.03%  | -1.35%  | 0.65%  | -0.37%  | -0.02% | -0.77% | -1.67%     | -2.53%  | -1.42% |
| D_0__Bacteria;D_1__Spirochaetae     | Spirochaetae              | 0.01%  | 0.30%   | 0.08%  | 0.00%   | 0.11%  | 0.09%  | -0.05%     | 1.00%   | 0.19%  |
| D_0__Bacteria;D_1__Tenericutes      | Tenericutes               | -1.00% | -1.11%  | 0.46%  | -0.59%  | -0.16% | -0.86% | -0.67%     | -0.81%  | -0.61% |
| D_0__Bacteria;D_1__Verrucomicrobia  | Verrucomicrobia           | -0.01% | 0.00%   | 0.00%  | 0.00%   | 0.00%  | -0.01% | 0.02%      | 0.00%   | 0.01%  |
| D_0__Bacteria;Other                 | U. m. of Bacteria kingdom | -0.03% | 0.11%   | -0.01% | -0.05%  | 0.12%  | -0.07% | -0.11%     | -0.04%  | -0.14% |
| Unclassified;Other                  | Others                    | -0.01% | 0.02%   | 0.01%  | -0.02%  | 0.04%  | -0.02% | -0.03%     | -0.02%  | -0.05% |

**Relative variation (%) at phylum level**

|                                    |                 | CG           |              |              | Breve2L        |                |                | CG+Breve2L     |                |                |
|------------------------------------|-----------------|--------------|--------------|--------------|----------------|----------------|----------------|----------------|----------------|----------------|
|                                    |                 | T1-T0        | T2-T0        | T3-T0        | T1-T0          | T2-T0          | T3-T0          | T1-T0          | T2-T0          | T3-T0          |
| D_0__Archaea;D_1__Euryarchaeota    | Euryarchaeota   | -89.55%      | Absent in T2 | Absent in T3 | Absent in both | Absent in T0   | Absent in both | -33.18%        | -42.40%        | -91.48%        |
| D_0__Bacteria;D_1__Actinobacteria  | Actinobacteria  | 16.33%       | -49.27%      | 83.57%       | 21.53%         | 108.81%        | 68.80%         | 0.58%          | -51.39%        | 14.34%         |
| D_0__Bacteria;D_1__Bacteroidetes   | Bacteroidetes   | 19.59%       | 32.35%       | 2.91%        | 1.30%          | 0.53%          | -0.45%         | 28.13%         | 46.45%         | 1.25%          |
| D_0__Bacteria;D_1__Chloroflexi     | Chloroflexi     | Absent in T1 | Absent in T2 | Absent in T3 | Absent in both | Absent in both | Absent in both | Absent in both | Absent in both | Absent in both |
| D_0__Bacteria;D_1__Cyanobacteria   | Cyanobacteria   | -4.37%       | 161.10%      | 249.82%      | 22.37%         | 700.72%        | 888.90%        | 278.40%        | 820.99%        | 217.85%        |
| D_0__Bacteria;D_1__Deferribacteres | Deferribacteres | -64.06%      | 215.77%      | 249.95%      | -66.63%        | -34.34%        | 82.35%         | -77.10%        | -1.56%         | 9.16%          |

|                                     |                           |         |         |         |         |         |         |         |          |         |
|-------------------------------------|---------------------------|---------|---------|---------|---------|---------|---------|---------|----------|---------|
| D_0__Bacteria;D_1__Firmicutes       | Firmicutes                | -19.85% | -35.19% | -6.60%  | 1.03%   | -1.37%  | 4.12%   | -20.22% | -41.23%  | 2.31%   |
| D_0__Bacteria;D_1__Fusobacteria     | Fusobacteria              | -78.35% | -81.55% | 42.75%  | -41.24% | -11.45% | 57.48%  | 134.51% | 90.26%   | 260.24% |
| D_0__Bacteria;D_1__Proteobacteria   | Proteobacteria            | -37.18% | -8.76%  | -8.05%  | -2.95%  | -4.23%  | 0.71%   | -55.83% | -41.03%  | 8.53%   |
| D_0__Bacteria;D_1__Saccharibacteria | Saccharibacteria          | 1.78%   | -82.58% | 39.85%  | -17.16% | -0.94%  | -36.20% | -57.05% | -86.64%  | -48.67% |
| D_0__Bacteria;D_1__Spirochaetae     | Spirochaetae              | 29.17%  | 705.53% | 180.45% | 3.13%   | 557.56% | 439.06% | -47.89% | 1020.66% | 197.34% |
| D_0__Bacteria;D_1__Tenericutes      | Tenericutes               | -75.38% | -84.22% | 34.99%  | -39.89% | -11.08% | -58.35% | -64.12% | -77.47%  | -58.40% |
| D_0__Bacteria;D_1__Verrucomicrobia  | Verrucomicrobia           | -45.61% | -23.33% | 19.81%  | -2.34%  | 18.00%  | -37.14% | 364.62% | 37.85%   | 224.55% |
| D_0__Bacteria;Other                 | U. m. of Bacteria kingdom | -30.99% | 113.38% | -10.26% | -51.54% | 123.40% | -75.60% | -62.04% | -22.61%  | -82.36% |
| Unclassified;Other                  | Others                    | -66.65% | 118.94% | 55.32%  | -81.52% | 183.01% | -92.25% | -56.82% | -32.54%  | -87.31% |

### Trend (effect of treatment respect to T0 controls)

|                                     |                           | CG    |       |       | Breve2L |       |       | CG+Breve2L |       |       |
|-------------------------------------|---------------------------|-------|-------|-------|---------|-------|-------|------------|-------|-------|
|                                     |                           | T0-T1 | T0-T2 | T0-T3 | T0-T1   | T0-T2 | T0-T3 | T0-T1      | T0-T2 | T0-T3 |
| D_0__Archaea;D_1__Euryarchaeota     | Euryarchaeota             | -     | -     | -     |         | +     |       | -          | -     | -     |
| D_0__Bacteria;D_1__Actinobacteria   | Actinobacteria            | +     | -     | +     | +       | +     | +     | +          | -     | +     |
| D_0__Bacteria;D_1__Bacteroidetes    | Bacteroidetes             | +     | +     | +     | +       | +     | -     | +          | +     | +     |
| D_0__Bacteria;D_1__Chloroflexi      | Chloroflexi               | -     | -     | -     |         |       |       |            |       |       |
| D_0__Bacteria;D_1__Cyanobacteria    | Cyanobacteria             | -     | +     | +     | +       | +     | +     | +          | +     | +     |
| D_0__Bacteria;D_1__Deferribacteres  | Deferribacteres           | -     | +     | +     | -       | -     | +     | -          | -     | +     |
| D_0__Bacteria;D_1__Firmicutes       | Firmicutes                | -     | -     | -     | +       | -     | +     | -          | -     | +     |
| D_0__Bacteria;D_1__Fusobacteria     | Fusobacteria              | -     | -     | +     | -       | -     | +     | +          | +     | +     |
| D_0__Bacteria;D_1__Proteobacteria   | Proteobacteria            | -     | -     | -     | -       | -     | +     | -          | -     | +     |
| D_0__Bacteria;D_1__Saccharibacteria | Saccharibacteria          | +     | -     | +     | -       | -     | -     | -          | -     | -     |
| D_0__Bacteria;D_1__Spirochaetae     | Spirochaetae              | +     | +     | +     | +       | +     | +     | -          | +     | +     |
| D_0__Bacteria;D_1__Tenericutes      | Tenericutes               | -     | -     | +     | -       | -     | -     | -          | -     | -     |
| D_0__Bacteria;D_1__Verrucomicrobia  | Verrucomicrobia           | -     | -     | +     | -       | +     | -     | +          | +     | +     |
| D_0__Bacteria;Other                 | U. m. of Bacteria kingdom | -     | +     | -     | -       | +     | -     | -          | -     | -     |
| Unclassified;Other                  | Others                    | -     | +     | +     | -       | +     | -     | -          | -     | -     |



|                                                                     |        |        |        |        |        |        |        |        |        |
|---------------------------------------------------------------------|--------|--------|--------|--------|--------|--------|--------|--------|--------|
| Prevotellaceae NK3B31 group                                         | 1.35%  | 1.32%  | 6.75%  | 5.42%  | 0.97%  | 2.36%  | 2.58%  | 2.75%  | 7.56%  |
| Prevotellaceae UCG-001                                              | -0.45% | 0.44%  | 1.15%  | 0.08%  | 0.39%  | 1.33%  | -0.27% | 0.63%  | 1.08%  |
| Prevotellaceae UCG-003                                              | -0.04% | 0.07%  | 0.10%  | 0.00%  | 0.07%  | -0.01% | -0.07% | 0.02%  | -0.03% |
| Prevotellaceae UCG-004                                              | 0.00%  | 0.00%  | 0.00%  | 0.00%  | 0.00%  | 0.00%  | 0.00%  | 0.00%  | 0.00%  |
| Prevotella                                                          | -0.01% | 0.05%  | 0.00%  | 0.05%  | 0.05%  | 0.02%  | -0.05% | 0.03%  | -0.04% |
| U. m. of Prevotellaceae family                                      | 4.41%  | 16.42% | -0.70% | -0.11% | -0.51% | 0.56%  | 6.38%  | 12.68% | -4.77% |
| Alistipes                                                           | -0.04% | -0.04% | 0.00%  | -0.01% | 0.19%  | 0.06%  | -0.07% | -0.06% | 0.00%  |
| Rikenellaceae RC9 gut group                                         | -0.16% | 0.07%  | 0.15%  | -0.06% | 0.25%  | 0.12%  | -0.06% | -0.04% | 0.15%  |
| Rikenella                                                           | -0.01% | -0.01% | -0.01% | 0.00%  | 0.00%  | 0.00%  | -0.02% | -0.02% | -0.02% |
| U. m. of Rikenellaceae family                                       | -0.01% | -0.01% | 0.00%  | 0.00%  | 0.00%  | 0.00%  | 0.00%  | 0.00%  | 0.00%  |
| U. m. of Bacteroidales order                                        | -0.57% | -0.53% | 0.11%  | -0.22% | -0.53% | -0.37% | -0.38% | -0.59% | -0.27% |
| U. m. of Cytophagales order                                         | -0.02% | -0.02% | 0.01%  | 0.02%  | 0.02%  | 0.02%  | -0.03% | -0.03% | -0.01% |
| Cloacibacterium                                                     | 0.00%  | 0.00%  | 0.00%  | 0.00%  | 0.00%  | 0.00%  | 0.00%  | 0.00%  | 0.00%  |
| Flavobacterium                                                      | 0.00%  | 0.00%  | 0.00%  |        |        |        | 0.00%  | 0.00%  | 0.00%  |
| U. m. of Bacteroidetes phylum                                       | -0.02% | -0.01% | 0.00%  | 0.00%  | 0.01%  | 0.01%  | -0.02% | -0.01% | 0.01%  |
| U. m. of AKIW781 family                                             | -0.01% | -0.01% | -0.01% |        |        |        |        |        |        |
| U. m. of Cyanobacteria phylum                                       | 0.01%  | -0.01% | 0.00%  | 0.00%  | 0.00%  | 0.00%  | 0.07%  | 0.01%  | 0.01%  |
| U. m. of Gastranaerophilales order                                  | -0.01% | 0.09%  | 0.13%  | 0.01%  | 0.18%  | 0.23%  | 0.03%  | 0.27%  | 0.07%  |
| Mucispirillum                                                       | 0.00%  | 0.00%  | 0.00%  | 0.00%  | 0.00%  | 0.00%  | 0.00%  | 0.00%  | 0.00%  |
| Anoxybacillus                                                       | 0.00%  | 0.00%  | 0.00%  |        |        |        | 0.00%  |        |        |
| Bacillus                                                            | -0.01% | -0.03% | -0.03% | -0.01% | 0.01%  | -0.02% | 0.04%  | -0.03% | -0.03% |
| Terribacillus                                                       | 0.00%  | 0.00%  | 0.00%  | 0.00%  | 0.00%  | 0.00%  | 0.00%  | 0.00%  | 0.00%  |
| Gemella                                                             | 0.00%  | 0.00%  | 0.00%  | 0.00%  | 0.00%  | 0.00%  | 0.00%  | -0.01% | 0.00%  |
| Brochothrix                                                         | 0.00%  | 0.00%  | 0.00%  |        |        | 0.00%  |        |        | 0.00%  |
| Listeria                                                            | 0.00%  | 0.00%  | 0.00%  |        |        | 0.00%  |        |        | 0.00%  |
| Staphylococcus                                                      | 0.03%  | 0.00%  | 0.01%  | 0.00%  | 0.00%  | 0.01%  | 0.04%  | 0.01%  | 0.01%  |
| Catabacter                                                          | 0.00%  | 0.00%  | 0.00%  | 0.00%  | 0.00%  | 0.00%  | 0.00%  | 0.00%  | 0.00%  |
| Christensenellaceae R-7 group                                       | -0.80% | -1.11% | -0.95% | -0.45% | 0.22%  | 0.07%  | -0.29% | -0.32% | -0.09% |
| U. m. of Christensenellaceae family                                 | -0.05% | -0.05% | -0.01% | -0.01% | 0.01%  | 0.00%  | -0.04% | -0.03% | 0.01%  |
| Clostridium sensu stricto 1                                         | -0.02% | -0.03% | 0.01%  | 0.00%  | 0.00%  | 0.01%  | 0.00%  | -0.01% | 0.01%  |
| U. m. of Clostridiales vadinBB60 group family                       | -0.04% | 0.02%  | 0.04%  | 0.00%  | 0.07%  | 0.03%  | -0.05% | -0.04% | 0.05%  |
| Defluviitaleaceae UCG-011                                           | 0.04%  | 0.02%  | 0.02%  | 0.00%  | 0.01%  | 0.02%  | 0.00%  | 0.00%  | 0.04%  |
| Anaerofustis                                                        | 0.00%  | 0.00%  | 0.00%  | 0.00%  | 0.00%  | 0.00%  | 0.00%  | 0.00%  | 0.00%  |
| Anaerovorax                                                         | -0.04% | -0.04% | 0.02%  | -0.02% | -0.01% | -0.01% | -0.07% | -0.07% | -0.01% |
| Eubacterium nodatum group (Clostridiales order, Family XIII family) | -0.08% | -0.07% | -0.04% | -0.05% | -0.04% | -0.03% | -0.10% | -0.12% | -0.09% |
| Family XIII AD3011 group (Clostridiales order)                      | -0.06% | -0.09% | 0.01%  | 0.00%  | 0.02%  | 0.00%  | -0.08% | -0.12% | -0.03% |
| Family XIII UCG-001 (Clostridiales order)                           | -0.01% | -0.02% | 0.00%  | 0.01%  | 0.01%  | 0.01%  | -0.02% | -0.02% | -0.01% |
| Mogibacterium                                                       | -0.01% | -0.01% | -0.01% | 0.00%  | 0.01%  | 0.00%  | 0.00%  | 0.00%  | -0.01% |
| U. m. of Family XIII family (Clostridiales order)                   | 0.00%  | -0.02% | 0.01%  | 0.02%  | 0.02%  | -0.01% | -0.02% | -0.06% | -0.02% |
| Acetatifactor                                                       | -0.07% | -0.07% | -0.02% | 0.07%  | -0.04% | 0.09%  | -0.07% | -0.07% | 0.38%  |
| Anaerostipes                                                        | 0.00%  | -0.05% | -0.03% | 0.06%  | 0.05%  | 0.09%  | 0.01%  | 0.00%  | 0.09%  |

|                                                        |        |        |        |        |        |        |        |        |        |
|--------------------------------------------------------|--------|--------|--------|--------|--------|--------|--------|--------|--------|
| Blautia                                                | -0.06% | -0.04% | -0.04% | -0.03% | -0.01% | -0.02% | 0.07%  | 0.01%  | 0.02%  |
| Butyrivibrio 2                                         | 0.00%  | 0.00%  | 0.01%  | 0.00%  |        | 0.01%  |        |        | 0.01%  |
| Butyrivibrio                                           | 0.00%  | 0.00%  | 0.02%  | -0.05% | -0.06% | -0.03% | -0.01% | -0.01% | 0.00%  |
| Coprococcus 2                                          | 0.00%  | 0.00%  | 0.00%  | 0.00%  | 0.00%  | 0.00%  | 0.00%  | 0.00%  | 0.00%  |
| Coprococcus 3                                          | -0.17% | -0.16% | 0.00%  | -0.04% | 0.06%  | -0.04% | -0.10% | -0.09% | -0.03% |
| Dorea                                                  | -0.10% | -0.10% | -0.09% | -0.05% | -0.06% | -0.03% | -0.05% | -0.06% | -0.05% |
| Eisenbergiella                                         | -0.02% | 0.04%  | -0.02% | 0.02%  | -0.01% | -0.03% | -0.03% | -0.05% | -0.04% |
| Eubacterium eligens group (Lachnospiraceae family)     | 0.00%  | 0.05%  | 0.01%  | 0.00%  | -0.01% | 0.00%  | 0.01%  | 0.00%  | 0.02%  |
| Eubacterium fissicatena group (Lachnospiraceae family) | 0.00%  | 0.00%  | 0.00%  | 0.00%  | 0.00%  | 0.00%  | 0.00%  | 0.00%  | 0.01%  |
| Eubacterium hallii group (Lachnospiraceae family)      | -0.08% | -0.05% | 0.14%  | 0.00%  | -0.04% | 0.04%  | -0.12% | -0.11% | 0.13%  |
| Eubacterium ruminantium group (Lachnospiraceae family) | 0.00%  | -0.01% | 0.00%  | 0.00%  | 0.00%  | 0.00%  | 0.01%  | 0.00%  | 0.00%  |
| Eubacterium uniforme                                   | 0.00%  | 0.00%  | 0.00%  |        |        |        | 0.00%  | 0.00%  |        |
| Eubacterium ventriosum group (Lachnospiraceae family)  | 1.00%  | 1.89%  | -0.01% | 0.02%  | 0.08%  | 0.05%  | 1.84%  | 0.56%  | 0.02%  |
| Fusicatenibacter                                       | 0.00%  | 0.06%  | 0.00%  | 0.00%  | 0.00%  | 0.00%  | 0.00%  | 0.00%  | 0.00%  |
| Howardella                                             | 0.00%  | 0.00%  | 0.00%  | 0.00%  | 0.00%  | 0.00%  | 0.00%  | 0.00%  | 0.00%  |
| Hungatella                                             | 0.00%  | 0.00%  | 0.00%  | 0.00%  | 0.00%  | 0.00%  | 0.00%  |        | 0.00%  |
| Lachnoanaerobaculum                                    | 0.00%  | 0.68%  | 0.41%  | -0.04% | 0.26%  | 0.48%  | -0.05% | 0.38%  | 0.77%  |
| Lachnoclostridium 10                                   | 0.00%  | 0.00%  | 0.00%  | 0.00%  | 0.00%  | 0.00%  | 0.00%  | 0.00%  | 0.00%  |
| Lachnoclostridium                                      | 0.00%  | 0.00%  | 0.00%  | 0.00%  | 0.00%  | 0.00%  | 0.01%  | 0.00%  | 0.01%  |
| Lachnospiraceae FCS020 group                           | -0.01% | -0.01% | 0.00%  | -0.01% | -0.01% | 0.00%  | -0.01% | -0.01% | 0.00%  |
| Lachnospiraceae ND3007 group                           | 0.00%  | 0.00%  | 0.00%  | 0.00%  | 0.00%  | 0.00%  | 0.00%  | 0.00%  | 0.00%  |
| Lachnospiraceae NK3A20 group                           | -0.01% | -0.01% | -0.01% | -0.01% | 0.01%  | -0.01% | -0.02% | -0.02% | -0.02% |
| Lachnospiraceae NK4A136 group                          | -1.54% | -1.32% | 1.89%  | -0.01% | 0.27%  | 1.92%  | -1.92% | -1.81% | 2.03%  |
| Lachnospiraceae NK4B4 group                            | -0.07% | -0.07% | -0.06% | 0.00%  | 0.00%  | 0.00%  | -0.01% | -0.01% | -0.01% |
| Lachnospiraceae UCG-001                                | -0.02% | 0.02%  | 0.00%  | 0.05%  | 0.16%  | -0.02% | 0.03%  | 0.03%  | 0.04%  |
| Lachnospiraceae UCG-006                                | -0.02% | 0.01%  | -0.01% | 0.04%  | 0.02%  | -0.01% | -0.03% | -0.06% | 0.00%  |
| Lachnospiraceae UCG-010                                | -0.01% | 0.00%  | 0.00%  | 0.00%  | 0.00%  | 0.00%  | -0.01% | -0.01% | 0.00%  |
| Lachnospiraceae XPB1014 group                          | -0.02% | -0.02% | 0.00%  | 0.01%  | -0.02% | -0.02% | -0.03% | -0.03% | -0.01% |
| Lachnospira                                            | -0.05% | -0.04% | 0.00%  | -0.02% | -0.05% | -0.03% | 0.00%  | 0.00%  | 0.10%  |
| Marvinbryantia                                         | 0.00%  | 0.11%  | 0.00%  | 0.02%  | -0.02% | -0.02% | 0.00%  | 0.00%  | 0.00%  |
| Mobilitalea                                            | 0.00%  | 0.00%  | 0.00%  | 0.00%  | 0.00%  | 0.00%  | 0.00%  | 0.00%  | 0.00%  |
| Moryella                                               | 0.00%  | 0.00%  | 0.00%  | 0.00%  | 0.00%  | 0.00%  | 0.00%  | 0.00%  | 0.00%  |
| Oribacterium                                           | -0.01% | -0.01% | 0.00%  | -0.01% | -0.01% | -0.01% | -0.02% | -0.02% | 0.01%  |
| Roseburia                                              | -0.02% | 0.00%  | 0.01%  | -0.01% | -0.01% | 0.01%  | -0.03% | -0.04% | -0.03% |
| Ruminococcus gnavus group (Lachnospiraceae family)     | -0.37% | 0.84%  | -0.42% | -0.11% | -0.44% | -0.34% | -0.37% | -0.48% | -0.68% |
| Syntrophococcus                                        | 0.00%  | 0.00%  | 0.00%  | 0.00%  | 0.00%  | 0.00%  | 0.00%  | 0.00%  | 0.00%  |
| Tyzzzeria 3                                            | -0.01% | -0.01% | 0.00%  | 0.00%  | 0.01%  | 0.01%  | 0.01%  | -0.01% | 0.00%  |
| Tyzzzeria 4                                            | 0.00%  | 0.00%  | 0.00%  | 0.00%  | 0.00%  | 0.00%  | -0.01% | -0.01% | -0.01% |
| Tyzzzeria                                              | -0.08% | -0.11% | -0.05% | -0.04% | -0.07% | -0.05% | -0.05% | -0.13% | -0.07% |
| U. m. of Lachnospiraceae family                        | -4.54% | -3.84% | 0.82%  | 4.72%  | 0.12%  | 1.54%  | -7.52% | -8.16% | 3.26%  |
| Peptococcus                                            | 0.00%  | 0.00%  | 0.01%  | 0.00%  | 0.00%  | 0.00%  | 0.00%  | 0.01%  | 0.02%  |

|                                                              |        |        |        |        |        |        |        |        |        |
|--------------------------------------------------------------|--------|--------|--------|--------|--------|--------|--------|--------|--------|
| U. m. of Peptococcaceae family                               | -0.01% | -0.01% | 0.00%  | 0.00%  | -0.01% | 0.01%  | -0.02% | -0.02% | -0.01% |
| Peptoclostridium                                             | 0.00%  | 0.00%  | 0.00%  |        |        | 0.00%  |        |        | 0.00%  |
| Peptostreptococcus                                           |        |        | 0.00%  |        |        | 0.00%  |        |        | 0.00%  |
| Romboutsia                                                   | -0.44% | -0.45% | -0.25% | -0.10% | 0.05%  | -0.12% | -0.20% | -0.21% | -0.04% |
| Terrisporobacter                                             | 0.00%  | 0.00%  | 0.00%  | 0.00%  | 0.00%  | 0.00%  | 0.00%  | 0.00%  | 0.00%  |
| U. m. of Peptostreptococcaceae family                        | -0.01% | -0.01% | -0.01% | 0.00%  | 0.00%  | 0.00%  | -0.01% | -0.01% | -0.01% |
| Anaerofilum                                                  | 0.00%  | -0.01% | 0.00%  | -0.01% | 0.00%  | 0.01%  | 0.00%  | -0.01% | 0.01%  |
| Anaerotruncus                                                | -0.53% | -0.39% | -0.26% | -0.06% | 0.06%  | 0.07%  | -0.51% | -0.56% | -0.13% |
| Butyricicoccus                                               | -0.06% | -0.05% | -0.03% | -0.03% | -0.02% | -0.02% | 0.01%  | -0.05% | 0.03%  |
| Candidatus Soleaferrea                                       | 0.00%  | 0.00%  | 0.00%  | 0.00%  | 0.00%  | 0.00%  | 0.00%  | -0.01% | 0.00%  |
| Caproiciproducens                                            | 0.00%  | 0.00%  | 0.00%  | 0.00%  | 0.00%  | 0.00%  | 0.00%  | 0.00%  | 0.00%  |
| Eubacterium coprostanoligenes group (Ruminococcaceae family) | -0.10% | -0.81% | 0.44%  | -0.04% | 0.28%  | 0.30%  | -0.34% | -0.71% | 0.12%  |
| Faecalibacterium                                             | -0.04% | 0.54%  | 0.05%  | 0.00%  | -0.03% | 0.05%  | 0.08%  | 0.01%  | 0.12%  |
| Flavonifractor                                               | -0.02% | -0.03% | -0.01% | 0.01%  | 0.02%  | 0.00%  | -0.03% | -0.03% | -0.01% |
| Hydrogenoanaerobacterium                                     | -0.08% | -0.11% | -0.04% | -0.03% | 0.01%  | -0.02% | -0.03% | -0.12% | -0.03% |
| Intestinimonas                                               | -0.23% | -0.25% | -0.05% | 0.01%  | 0.01%  | 0.07%  | -0.20% | -0.32% | -0.02% |
| Oscillibacter                                                | -0.29% | -0.16% | -0.04% | -0.20% | -0.06% | -0.11% | -0.39% | -0.47% | -0.01% |
| Oscillospira                                                 | 0.00%  | -0.01% | -0.01% | 0.00%  | 0.00%  | 0.00%  | 0.00%  | -0.01% | 0.01%  |
| Papillibacter                                                | -0.06% | -0.01% | -0.02% | 0.04%  | 0.10%  | 0.04%  | -0.07% | -0.08% | -0.01% |
| Ruminiclostridium 1                                          | 0.00%  | 0.00%  | 0.00%  | 0.00%  | 0.00%  | 0.00%  | 0.00%  | 0.00%  | 0.00%  |
| Ruminiclostridium 5                                          | 3.01%  | 0.97%  | 0.72%  | -0.03% | -0.02% | 0.24%  | 0.79%  | 0.33%  | 0.09%  |
| Ruminiclostridium 6                                          | -0.56% | -0.27% | -0.47% | -0.05% | 0.09%  | 0.72%  | -0.67% | -0.16% | 0.07%  |
| Ruminiclostridium 9                                          | -1.03% | -1.06% | 0.21%  | -0.22% | -0.06% | -0.06% | -1.66% | -2.02% | -0.84% |
| Ruminiclostridium                                            | -0.08% | -0.08% | -0.03% | -0.03% | -0.03% | -0.02% | -0.07% | -0.10% | 0.03%  |
| Ruminococcaceae NK4A214 group                                | -0.08% | -0.16% | -0.05% | -0.10% | -0.03% | -0.03% | -0.04% | -0.04% | 0.02%  |
| Ruminococcaceae UCG-002                                      | -0.08% | -0.04% | 0.04%  | -0.09% | -0.17% | -0.12% | -0.19% |        | 0.08%  |
| Ruminococcaceae UCG-003                                      | 0.00%  | 0.00%  | 0.00%  | 0.00%  | 0.00%  | 0.00%  | 0.00%  |        | 0.00%  |
| Ruminococcaceae UCG-004                                      | 0.00%  | 0.00%  | 0.00%  | 0.00%  | 0.00%  | 0.00%  | -0.01% | 0.00%  | 0.00%  |
| Ruminococcaceae UCG-005                                      | 0.75%  | -0.84% | -2.15% | -1.24% | 0.84%  | -0.35% | 6.87%  | 2.85%  | 0.39%  |
| Ruminococcaceae UCG-007                                      | 0.00%  | 0.00%  | 0.01%  | 0.00%  | 0.00%  | 0.00%  | 0.00%  | 0.00%  | 0.00%  |
| Ruminococcaceae UCG-009                                      | -0.22% | -0.17% | -0.11% | -0.03% | -0.02% | 0.00%  | -0.14% | -0.16% | 0.03%  |
| Ruminococcaceae UCG-010                                      | -0.09% | -0.12% | -0.08% | 0.01%  | 0.05%  | 0.01%  | -0.04% | -0.09% | -0.02% |
| Ruminococcaceae UCG-013                                      | -0.24% | -0.26% | 0.12%  | -0.20% | 0.01%  | -0.12% | -0.35% | -0.42% | 0.01%  |
| Ruminococcaceae UCG-014                                      | -1.35% | -1.78% | -0.47% | -0.95% | -1.11% | -1.16% | -1.50% | 1.16%  | -1.46% |
| Ruminococcaceae V9D2013 group                                | 0.00%  | 0.00%  | 0.00%  | 0.00%  | 0.00%  | 0.00%  | -0.01% | 0.00%  | 0.00%  |
| Ruminococcus 1                                               | -3.34% | -2.90% | -1.52% | 0.05%  | 1.15%  | 0.34%  | -0.21% | -1.71% | -0.26% |
| Ruminococcus 2                                               | 0.07%  | 0.01%  | 0.04%  | -0.04% | -0.01% | 0.02%  | -0.07% | -0.15% | -0.11% |
| Sporobacter                                                  | 0.00%  | -0.01% | 0.01%  | 0.01%  | 0.01%  | 0.02%  | -0.02% | -0.04% | -0.02% |
| Subdoligranulum                                              | -0.01% | -0.01% | 0.02%  | 0.01%  | 0.00%  | 0.01%  | 0.01%  | 0.00%  | 0.02%  |
| U. m. of Ruminococcaceae family                              | 0.03%  | -1.18% | -0.07% | -0.49% | -0.55% | -0.40% | -2.23% | -2.76% | -1.34% |
| U. m. of Clostridiales order                                 | -0.13% | -0.18% | -0.06% | -0.11% | -0.02% | -0.11% | -0.08% | -0.25% | -0.12% |

|                                     |        |        |        |        |        |        |        |        |        |
|-------------------------------------|--------|--------|--------|--------|--------|--------|--------|--------|--------|
| Allobaculum                         | 1.30%  | -0.01% | -0.07% | 0.04%  | 0.08%  | -0.04% | 0.47%  | 0.04%  | -0.01% |
| Candidatus Stoquefichus             | 0.52%  | 0.32%  | 0.00%  | 0.00%  | 0.00%  | 0.00%  | 0.47%  | 0.12%  | 0.00%  |
| Catenibacterium                     |        |        | 0.00%  |        |        | 0.00%  | 0.00%  |        | 0.00%  |
| Dielma                              | 0.00%  | 0.00%  | 0.00%  | 0.00%  | 0.00%  | 0.00%  | 0.00%  | 0.00%  | 0.00%  |
| Erysipelatoclostridium              | 0.00%  | 0.00%  | 0.00%  | 0.00%  | 0.00%  | 0.00%  | 0.00%  | 0.00%  | 0.00%  |
| Erysipelotrichaceae UCG-002         | 0.00%  | 0.00%  | 0.00%  |        |        | 0.00%  |        |        | 0.00%  |
| Erysipelotrichaceae UCG-003         | 0.02%  | 0.07%  | -0.03% | -0.05% | 0.01%  | -0.02% | 0.30%  | 0.04%  | -0.01% |
| Faecalibaculum                      | 0.01%  | 0.00%  | 0.00%  | 0.00%  | 0.01%  | 0.00%  | 0.00%  | 0.00%  | 0.01%  |
| Holdemanella                        | 0.00%  |        | 0.00%  |        | 0.00%  | 0.00%  | 0.00%  | 0.00%  | 0.00%  |
| Turicibacter                        | -0.06% | -0.05% | -0.03% | -0.08% | -0.04% | -0.09% | -0.06% | -0.06% | -0.05% |
| U. m. of Erysipelotrichaceae family | 1.03%  | 0.01%  | 0.05%  | -0.07% | 0.23%  | -0.09% | 0.36%  | 0.13%  | -0.01% |
| Enterococcus                        | 0.03%  | 0.03%  | 0.04%  | 0.00%  | 0.00%  | 0.03%  | 0.03%  | 0.02%  | 0.03%  |
| Lactobacillus                       | 1.14%  | -1.95% | -0.82% | 0.49%  | -1.96% | -1.29% | -1.15% | -1.01% | -1.21% |
| Lactococcus                         | -0.01% | -0.01% | 0.00%  | 0.00%  | 0.00%  | 0.00%  | 0.00%  | 0.00%  | 0.00%  |
| Streptococcus                       | 0.01%  | -0.03% | 0.06%  | -0.01% | -0.01% | 0.02%  | -0.07% | -0.10% | -0.03% |
| Acidaminococcus                     | 0.00%  | 0.00%  | 0.00%  | 0.00%  |        | 0.00%  | 0.00%  | 0.00%  | 0.00%  |
| Phascolarctobacterium               | 0.00%  | 0.05%  | 0.02%  | 0.00%  | 0.00%  | 0.02%  | 0.00%  | 0.00%  | 0.01%  |
| Anaerovibrio                        | 0.25%  | 0.26%  | 0.06%  | -0.02% | 0.02%  | -0.02% | 0.29%  | 0.03%  | 0.00%  |
| Dialister                           | 0.00%  | 0.00%  | 0.01%  | 0.00%  | 0.00%  | 0.00%  | 0.01%  | 0.00%  | 0.00%  |
| Megamonas                           | 0.00%  | 0.00%  | 0.01%  | 0.00%  | 0.00%  | 0.00%  |        | 0.00%  | 0.00%  |
| Megasphaera                         | 0.00%  | 0.00%  | 0.00%  |        |        | 0.00%  |        |        | 0.00%  |
| Quinella                            | 0.00%  | 0.08%  | 0.12%  | -0.04% | -0.03% | -0.05% | -0.18% | -0.16% | -0.10% |
| Veillonella                         | -0.01% | -0.02% | 0.02%  | -0.01% | -0.01% | 0.00%  | -0.03% | -0.02% | 0.01%  |
| U. m. of Veillonellaceae family     | 0.05%  | 0.12%  | 0.20%  | -0.06% | 0.14%  | 0.17%  | -0.04% | -0.07% | -0.03% |
| U. m. of Selenomonadales order      | 0.01%  | 0.00%  | 0.00%  | 0.00%  | 0.00%  | 0.00%  | 0.00%  | 0.00%  | 0.00%  |
| U. m. of Firmicutes phylum          | 0.00%  | 0.00%  | 0.02%  | 0.00%  | 0.01%  | 0.00%  | -0.01% | 0.00%  | 0.00%  |
| Cetobacterium                       | 0.00%  | 0.00%  | 0.00%  |        |        |        |        |        | 0.00%  |
| Fusobacterium                       | -0.02% | -0.02% | 0.01%  | -0.01% | 0.00%  | 0.02%  | 0.01%  | 0.01%  | 0.02%  |
| Anaerobiospirillum                  | 0.00%  | 0.00%  | 0.00%  | 0.00%  | 0.00%  | 0.00%  | 0.00%  | 0.00%  | 0.00%  |
| Succinivibrio                       | -0.01% | -0.01% | 0.04%  | 0.00%  | 0.00%  | 0.03%  | 0.00%  | 0.00%  | 0.04%  |
| U. m. of Succinivibrionaceae family | 0.00%  | 0.00%  | 0.02%  | 0.00%  | 0.00%  | 0.00%  | 0.00%  | 0.00%  | 0.01%  |
| U. m. of Aeromonadales order        | 0.00%  | 0.00%  | 0.00%  | 0.00%  | 0.00%  | 0.00%  | 0.00%  | 0.00%  | 0.00%  |
| Parasutterella                      | -0.07% | 0.05%  | -0.09% | -0.05% | 0.17%  | 0.02%  | 0.05%  | 0.08%  | 0.00%  |
| Sutterella                          | 0.00%  | 0.00%  | 0.01%  | 0.00%  |        | 0.01%  | 0.01%  | 0.00%  | 0.01%  |
| U. m. of CM1G08 family              | 0.00%  | 0.00%  | 0.00%  | 0.00%  | 0.00%  | 0.00%  |        |        | 0.00%  |
| U. m. of Burkholderiales order      | 0.00%  | 0.00%  | 0.00%  | 0.00%  | 0.02%  | 0.01%  | 0.00%  | 0.00%  | 0.01%  |
| Helicobacter                        | -0.10% | -0.03% | 0.00%  | -0.12% | -0.03% | -0.10% | -0.04% | -0.02% | 0.08%  |
| Caulobacter                         | 0.00%  |        | 0.00%  | 0.00%  | 0.00%  | 0.00%  | 0.00%  | 0.00%  | 0.00%  |
| U. m. of Cellvibrionales order      | 0.00%  | 0.00%  | 0.00%  | 0.00%  | 0.00%  | 0.00%  | 0.00%  | 0.00%  | 0.00%  |
| Bilophila                           | 0.00%  | 0.00%  | 0.00%  | 0.00%  | 0.00%  | 0.00%  | 0.00%  | 0.00%  | 0.00%  |
| Desulfovibrio                       | -0.05% | -0.10% | 0.20%  | 0.00%  | 0.14%  | 0.14%  | -0.48% | -0.48% | -0.15% |



|                                     |        |        |        |        |        |        |        |        |        |
|-------------------------------------|--------|--------|--------|--------|--------|--------|--------|--------|--------|
| Citrobacter                         | 0.00%  | 0.00%  | 0.00%  | 0.00%  | 0.00%  | 0.00%  | 0.00%  | 0.00%  | 0.00%  |
| Enterobacter                        | 0.00%  | -0.01% | 0.02%  | 0.00%  | 0.00%  | 0.01%  | 0.01%  | 0.00%  | 0.02%  |
| Escherichia-Shigella                | 0.03%  | -0.03% | 0.10%  | 0.02%  | 0.01%  | 0.07%  | 0.03%  | 0.01%  | 0.07%  |
| Hafnia-Obesumbacterium              |        |        | 0.00%  | 0.00%  | 0.00%  | 0.00%  | 0.00%  |        | 0.00%  |
| Klebsiella                          | 0.00%  | 0.00%  | 0.01%  | 0.00%  | 0.00%  | 0.01%  | 0.00%  | 0.00%  | 0.01%  |
| Salmonella                          | 0.00%  | 0.00%  | 0.00%  | 0.00%  | 0.00%  | 0.00%  | 0.00%  |        | 0.00%  |
| Serratia                            | 0.00%  | 0.00%  | 0.00%  | 0.00%  |        | 0.00%  | 0.00%  | 0.00%  | 0.00%  |
| U. m. of Enterobacteriaceae family  | 0.00%  | 0.00%  | 0.01%  | 0.00%  | 0.00%  | 0.00%  | 0.00%  | 0.00%  | 0.01%  |
| Haemophilus                         | 0.00%  |        | 0.00%  | 0.00%  | 0.00%  | 0.00%  | 0.00%  |        |        |
| Necropsobacter                      | 0.00%  | 0.01%  | 0.00%  | 0.00%  | 0.00%  | 0.00%  | 0.00%  | 0.00%  | 0.00%  |
| Pasteurella                         | -0.01% | 0.00%  | 0.01%  | 0.00%  | 0.00%  | 0.00%  | 0.00%  | 0.00%  | 0.00%  |
| U. m. of Pasteurellaceae family     |        | 0.00%  |        | 0.00%  | 0.00%  | 0.00%  |        | 0.00%  | 0.00%  |
| Acinetobacter                       | 0.00%  | 0.00%  | 0.00%  |        | 0.00%  | 0.00%  | 0.00%  |        | 0.00%  |
| Enhydrobacter                       | 0.01%  |        |        | 0.00%  | 0.00%  | 0.00%  | 0.00%  | 0.00%  |        |
| Paracoccus                          | 0.00%  |        | 0.00%  | 0.00%  |        | 0.00%  | 0.00%  | 0.00%  |        |
| U. m. of Rhodospirillaceae family   | -0.07% | 0.20%  | 0.11%  | -0.02% | 0.20%  | 0.00%  | 0.20%  | 0.27%  | 0.19%  |
| Vibrio                              | 0.00%  | 0.00%  | 0.00%  |        |        | 0.00%  |        |        | 0.00%  |
| Stenotrophomonas                    | 0.00%  | 0.00%  | 0.00%  | 0.00%  | 0.00%  | 0.00%  | 0.00%  | 0.00%  | 0.00%  |
| U. m. of Proteobacteria phylum      | -0.70% | -0.30% | -0.67% | 0.07%  | -0.64% | -0.19% | -1.64% | -1.24% | -0.01% |
| U. m. of Saccharibacteria phylum    | 0.03%  | -1.35% | 0.65%  | -0.37% | -0.02% | -0.77% | -1.67% | -2.53% | -1.42% |
| Treponema 2                         | 0.01%  | 0.30%  | 0.08%  | 0.00%  | 0.11%  | 0.09%  | -0.05% | 1.00%  | 0.19%  |
| Anaeroplasm                         | 0.00%  | 0.00%  | 0.00%  | 0.00%  | 0.01%  | 0.00%  | -0.01% | -0.01% | -0.01% |
| U. m. of Mollicutes RF9 order       | -1.01% | -1.13% | 0.45%  | -0.58% | -0.22% | -0.87% | -0.66% | -0.84% | -0.61% |
| U. m. of Mycoplasmataceae family    | 0.01%  | 0.02%  | 0.01%  | 0.00%  | 0.05%  | 0.02%  | -0.01% | 0.04%  | 0.01%  |
| U. m. of Opitutae vadinHA64 order   | 0.00%  | 0.00%  | 0.00%  | 0.00%  | 0.00%  | 0.00%  |        | 0.00%  |        |
| U. m. of Verrucomicrobia phylum     | -0.02% | 0.00%  | -0.01% | 0.00%  | 0.00%  | -0.01% | 0.00%  | 0.00%  | 0.00%  |
| Akkermansia                         | 0.00%  | 0.00%  | 0.02%  | 0.00%  | 0.00%  | 0.00%  | 0.02%  | 0.00%  | 0.01%  |
| U. m. of Verrucomicrobiaceae family | 0.00%  |        | 0.00%  |        | 0.00%  |        | 0.00%  |        | 0.00%  |
| U. m. of Bacteria kingdom           | -0.03% | 0.11%  | -0.01% | -0.05% | 0.12%  | -0.07% | -0.11% | -0.04% | -0.14% |
| Others                              | -0.01% | 0.02%  | 0.01%  | -0.02% | 0.04%  | -0.02% | -0.03% | -0.02% | -0.05% |

| Taxonomy                                     | Relative variation (%) at genus level |                |              |                |                |                |                |                |                |
|----------------------------------------------|---------------------------------------|----------------|--------------|----------------|----------------|----------------|----------------|----------------|----------------|
|                                              | CG                                    |                |              | Breve2L        |                |                | CG+Breve2L     |                |                |
|                                              | T1-T0                                 | T2-T0          | T3-T0        | T1-T0          | T2-T0          | T3-T0          | T1-T0          | T2-T0          | T3-T0          |
| U. m. of Euryarchaeota phylum                | -89.55%                               | Absent in T2   | Absent in T3 | Absent in both | Absent in T0   | Absent in both | -33.18%        | -42.40%        | -91.48%        |
| Actinomyces                                  | 56.66%                                | -54.97%        | 147.92%      | -47.61%        | -19.02%        | -0.42%         | -59.81%        | -74.57%        | -68.13%        |
| Bifidobacterium                              | 75.50%                                | -60.52%        | 293.53%      | 306.16%        | 652.19%        | 350.85%        | 75.76%         | -35.66%        | 113.47%        |
| Gardnerella                                  | 181.39%                               | Absent in T2   | 40.28%       | Absent in both | Absent in both | Absent in both | 119.76%        | Absent in T2   | 52.17%         |
| Adlercreutzia                                | 106.05%                               | -21.99%        | -20.06%      | 52.33%         | 75.95%         | 27.47%         | 34.26%         | -59.29%        | -34.90%        |
| Atopobium                                    | 63.36%                                | -70.64%        | 45.15%       | -72.74%        | -2.74%         | -50.19%        | -39.67%        | -74.06%        | 12.44%         |
| Collinsella                                  | -42.29%                               | 34.54%         | 296.94%      | 6.04%          | 320.36%        | 601.60%        | 80.79%         | 133.55%        | 653.32%        |
| Coriobacteriaceae UCG-002                    | 453.36%                               | 225.55%        | -1.42%       | -16.08%        | 83.61%         | -57.35%        | 113.05%        | 308.99%        | -38.60%        |
| Enterorhabdus                                | -62.17%                               | -80.15%        | 20.98%       | -9.24%         | 92.78%         | 93.25%         | -86.52%        | -83.57%        | -38.93%        |
| Gordonibacter                                | 14.65%                                | -58.41%        | 3.54%        | -15.49%        | 76.54%         | Absent in T3   | 63.63%         | 100.29%        | 27.93%         |
| Parvibacter                                  | Absent in T1                          | -77.51%        | 2.28%        | Absent in T0   | Absent in T0   | Absent in T0   | Absent in T1   | Absent in T2   | 56.58%         |
| Senegalimassilia                             | Absent in both                        | Absent in T0   | Absent in T0 | Absent in both | Absent in T0   | Absent in both | Absent in both | Absent in both | Absent in T0   |
| U. m. of Coriobacteriaceae family            | 8.62%                                 | -59.46%        | 12.89%       | -31.95%        | -12.19%        | -23.90%        | -60.07%        | -82.40%        | -60.05%        |
| Corynebacterium                              | -64.56%                               | 93.03%         | -79.21%      | Absent in both | Absent in both | Absent in T0   | 1099.21%       | Absent in T2   | 239.11%        |
| Microbacterium                               | 40.79%                                | Absent in T2   | 52.10%       | Absent in both | Absent in both | Absent in T0   | Absent in T0   | Absent in both | Absent in T0   |
| U. m. of Microbacteriaceae family            | 169.18%                               | Absent in T2   | -28.63%      | Absent in both | Absent in both | Absent in both | Absent in T0   | Absent in both | Absent in both |
| Rothia                                       | Absent in T1                          | Absent in T2   | 287.00%      | Absent in both | Absent in both | Absent in T0   | Absent in T0   | Absent in both | Absent in T0   |
| U. m. of Micrococcaceae family               | 0.52%                                 | -33.72%        | 151.10%      | -13.90%        | -26.96%        | 2.69%          | 8.53%          | 1.71%          | 67.53%         |
| Propionibacterium                            | -32.35%                               | -81.06%        | -63.70%      | 1.24%          | 227.53%        | 340.59%        | 1095.45%       | 42.51%         | 248.39%        |
| U. m. of Actinobacteria phylum               | Absent in T1                          | -29.00%        | -35.23%      | Absent in both | Absent in T0   | Absent in T0   | -78.22%        | -76.80%        | -42.65%        |
| Bacteroides                                  | -72.86%                               | -15.52%        | -12.56%      | -40.33%        | -55.61%        | -41.35%        | -40.16%        | -84.05%        | 12.17%         |
| U. m. of Bacteroidales BS11 gut group family | Absent in T1                          | Absent in T2   | 203.87%      | Absent in both | Absent in T0   | Absent in T0   | Absent in both | Absent in both | Absent in T0   |
| U. m. of Bacteroidales RF16 group family     | -74.18%                               | -28.80%        | 32.53%       | -30.79%        | -41.53%        | -42.92%        | -51.37%        | 9.28%          | -1.29%         |
| U. m. of Bacteroidales S24-7 group family    | 19.64%                                | -17.83%        | -20.56%      | -13.84%        | 1.93%          | -14.51%        | 8.99%          | 3.68%          | -10.11%        |
| Barnesiella                                  | -50.60%                               | -84.97%        | 416.99%      | -22.29%        | Absent in T2   | 288.83%        | 61.03%         | Absent in T2   | 245.25%        |
| Butyricimonas                                | -27.40%                               | 91.28%         | -4.88%       | 8.01%          | 28.26%         | -15.72%        | 86.42%         | 210.88%        | 174.99%        |
| Coprobacter                                  | Absent in both                        | Absent in both | Absent in T0 | Absent in both | Absent in both | Absent in T0   | Absent in both | Absent in both | Absent in T0   |
| Odoribacter                                  | -30.01%                               | -38.45%        | -7.14%       | 40.39%         | 76.10%         | 19.92%         | -29.73%        | -54.63%        | 8.88%          |
| Parabacteroides                              | 139.78%                               | 179.37%        | -23.94%      | -17.78%        | 79.16%         | 4.05%          | 275.16%        | 226.56%        | -4.81%         |
| U. m. of Porphyromonadaceae family           | -65.88%                               | -70.91%        | 294.93%      | 84.88%         | 351.74%        | 565.88%        | -41.48%        | 102.14%        | 1327.11%       |
| Alloprevotella                               | -35.61%                               | -32.08%        | 105.40%      | -31.64%        | -29.43%        | 32.98%         | -16.36%        | 20.52%         | 118.62%        |
| Paraprevotella                               | -44.97%                               | 585.49%        | -25.43%      | -63.33%        | -76.82%        | -38.25%        | -14.20%        | -32.91%        | 42.56%         |
| Prevotella 1                                 | 27.31%                                | 100.03%        | -20.32%      | 1.99%          | -6.56%         | -20.53%        | 46.71%         | 103.06%        | -50.62%        |
| Prevotella 2                                 | 29.53%                                | 345.19%        | -40.80%      | 29.50%         | 63.18%         | 6.31%          | 0.31%          | 142.93%        | -75.32%        |
| Prevotella 7                                 | -20.78%                               | 15.14%         | -37.34%      | -19.87%        | -12.09%        | -4.35%         | 52.81%         | 79.71%         | -7.07%         |
| Prevotella 9                                 | 44.50%                                | -85.11%        | 348.21%      | 837.16%        | 245.56%        | 2614.53%       | 1139.70%       | 66.94%         | 1222.17%       |
| Prevotellaceae Ga6A1 group                   | Absent in both                        | Absent in both | Absent in T0 | Absent in both | Absent in both | Absent in T0   | Absent in both | Absent in both | Absent in T0   |
| Prevotellaceae NK3B31 group                  | 68.41%                                | 66.84%         | 342.39%      | 235.33%        | 42.33%         | 102.46%        | 264.40%        | 281.04%        | 774.23%        |
| Prevotellaceae UCG-001                       | -43.64%                               | 42.17%         | 110.94%      | 9.49%          | 49.49%         | 167.09%        | -31.30%        | 71.56%         | 123.53%        |
| Prevotellaceae UCG-003                       | -21.12%                               | 34.96%         | 46.76%       | 2.64%          | 46.68%         | -6.44%         | -34.85%        | 11.57%         | -16.32%        |
| Prevotellaceae UCG-004                       | Absent in T1                          | -75.51%        | -68.34%      | 0.05%          | 43.07%         | Absent in T3   | Absent in T1   | 137.77%        | -63.70%        |
| Prevotella                                   | -26.34%                               | 193.71%        | -3.43%       | 95.51%         | 95.98%         | 32.61%         | -80.01%        | 40.53%         | -65.60%        |
| U. m. of Prevotellaceae family               | 39.08%                                | 145.40%        | -6.18%       | -0.68%         | -3.16%         | 3.45%          | 49.12%         | 97.59%         | -36.69%        |
| Alistipes                                    | -33.95%                               | -33.70%        | 2.27%        | -3.61%         | 134.62%        | 41.04%         | -51.13%        | -38.99%        | -2.41%         |

|                                                                     |              |              |              |                |                |                |                |                |                |
|---------------------------------------------------------------------|--------------|--------------|--------------|----------------|----------------|----------------|----------------|----------------|----------------|
| Rikenellaceae RC9 gut group                                         | -58.80%      | 25.77%       | 55.63%       | -36.92%        | 162.69%        | 79.24%         | -32.78%        | -22.14%        | 86.31%         |
| Rikenella                                                           | Absent in T1 | Absent in T2 | -92.80%      | -42.94%        | 27.62%         | 14.41%         | -97.24%        | Absent in T2   | -95.77%        |
| U. m. of Rikenellaceae family                                       | -90.54%      | -95.28%      | -77.18%      | 62.54%         | 163.13%        | -8.41%         | Absent in T1   | -81.21%        | -74.39%        |
| U. m. of Bacteroidales order                                        | -39.23%      | -36.40%      | 7.52%        | -14.63%        | -34.48%        | -24.04%        | -28.37%        | -44.62%        | -20.29%        |
| U. m. of Cytophagales order                                         | -80.59%      | -77.42%      | 29.76%       | 67.26%         | 62.37%         | 61.56%         | -82.14%        | -90.57%        | -34.98%        |
| Cloacibacterium                                                     | -90.85%      | 12.28%       | Absent in T3 | Absent in T1   | Absent in T2   | Absent in T3   | -17.70%        | -68.69%        | Absent in T3   |
| Flavobacterium                                                      | Absent in T0 | Absent in T0 | Absent in T0 | Absent in both | Absent in both | Absent in both | 537.76%        | -40.18%        | Absent in T3   |
| U. m. of Bacteroidetes phylum                                       | -85.94%      | -68.60%      | -16.39%      | 15.02%         | 33.82%         | 36.89%         | -83.55%        | -52.12%        | 49.55%         |
| U. m. of AKIW781 family                                             | Absent in T1 | Absent in T2 | Absent in T3 | Absent in both | Absent in both | Absent in both | Absent in both | Absent in both | Absent in both |
| U. m. of Cyanobacteria phylum                                       | 94.15%       | -84.73%      | -26.35%      | 46.60%         | 43.13%         | 262.82%        | 5813.20%       | 998.01%        | 441.63%        |
| U. m. of Gastranaerophilales order                                  | -40.36%      | 250.90%      | 350.70%      | 21.56%         | 722.44%        | 909.58%        | 77.08%         | 814.55%        | 209.71%        |
| Mucispirillum                                                       | -64.06%      | 215.77%      | 249.95%      | -66.63%        | -34.34%        | 82.35%         | -77.10%        | -1.56%         | 9.16%          |
| Anoxybacillus                                                       | 57.01%       | Absent in T2 | 52.76%       | Absent in both | Absent in both | Absent in both | Absent in T0   | Absent in both | Absent in both |
| Bacillus                                                            | -23.25%      | -90.52%      | -85.09%      | -38.65%        | 18.17%         | -50.79%        | 121.12%        | -85.27%        | -85.76%        |
| Terribacillus                                                       | -88.36%      | Absent in T2 | Absent in T3 | -84.53%        | 5.86%          | -83.77%        | -57.30%        | Absent in T2   | -62.75%        |
| Gemella                                                             | -88.26%      | Absent in T2 | 87.17%       | -91.49%        | -69.90%        | -30.75%        | -47.82%        | -91.37%        | -56.03%        |
| Brochothrix                                                         | Absent in T1 | Absent in T2 | 189.24%      | Absent in both | Absent in both | Absent in T0   | Absent in both | Absent in both | Absent in T0   |
| Listeria                                                            | Absent in T1 | Absent in T2 | 217.30%      | Absent in both | Absent in both | Absent in T0   | Absent in both | Absent in both | Absent in T0   |
| Staphylococcus                                                      | 770.81%      | 8.62%        | 185.96%      | 37.68%         | -34.59%        | 175.95%        | 2893.04%       | 772.24%        | 528.09%        |
| Catabacter                                                          | 27.02%       | Absent in T2 | 362.83%      | -67.78%        | -36.27%        | 20.48%         | Absent in T1   | Absent in T2   | 150.96%        |
| Christensenellaceae R-7 group                                       | -57.10%      | -79.33%      | -68.04%      | -49.01%        | 23.70%         | 7.33%          | -52.73%        | -57.52%        | -15.84%        |
| U. m. of Christensenellaceae family                                 | -82.43%      | -82.47%      | -16.05%      | -26.09%        | 30.30%         | 9.35%          | -85.01%        | -80.36%        | 13.51%         |
| Clostridium sensu stricto 1                                         | -81.60%      | Absent in T2 | 41.39%       | 23.59%         | -79.59%        | 262.37%        | -3.36%         | -89.89%        | 45.93%         |
| U. m. of Clostridiales vadinBB60 group family                       | -64.14%      | 23.95%       | 60.19%       | -0.42%         | 90.37%         | 35.28%         | -62.62%        | -42.36%        | 61.61%         |
| Defluviitaleaceae UCG-011                                           | 1636.67%     | 919.25%      | 895.49%      | 68.28%         | 251.65%        | 485.77%        | -18.85%        | 29.12%         | 429.79%        |
| Anaerofustis                                                        | Absent in T1 | Absent in T2 | -61.63%      | 94.25%         | 46.72%         | -61.39%        | Absent in T1   | Absent in T2   | -10.21%        |
| Anaerovorax                                                         | -73.09%      | -77.58%      | 40.25%       | -30.99%        | -9.69%         | -19.44%        | -90.47%        | -89.75%        | -10.59%        |
| Eubacterium nodatum group (Clostridiales order, Family XIII family) | -58.42%      | -54.02%      | -30.99%      | -40.23%        | -34.71%        | -22.59%        | -65.71%        | -74.98%        | -58.85%        |
| Family XIII AD3011 group (Clostridiales order)                      | -45.11%      | -61.31%      | 4.38%        | -0.41%         | 14.79%         | 2.11%          | -46.71%        | -68.02%        | -16.78%        |
| Family XIII UCG-001 (Clostridiales order)                           | -30.63%      | -58.77%      | 11.52%       | 28.22%         | 55.04%         | 41.96%         | -41.99%        | -59.63%        | -15.00%        |
| Mogibacterium                                                       | -40.76%      | -64.25%      | -70.16%      | -79.84%        | 1012.69%       | Absent in T3   | -20.84%        | -38.86%        | -92.72%        |
| U. m. of Family XIII family (Clostridiales order)                   | 7.30%        | -29.00%      | 16.08%       | 28.53%         | 36.60%         | -7.99%         | -24.28%        | -68.17%        | -19.03%        |
| Acetatifactor                                                       | -93.63%      | -88.05%      | -28.29%      | 53.73%         | -29.31%        | 70.02%         | -88.05%        | -82.34%        | 453.67%        |
| Anaerostipes                                                        | 7.52%        | -82.50%      | -45.72%      | 73.89%         | 58.53%         | 111.47%        | 15.60%         | -14.14%        | 256.84%        |
| Blautia                                                             | -53.36%      | -39.68%      | -38.56%      | -54.82%        | -27.06%        | -30.96%        | 197.49%        | 20.90%         | 48.15%         |
| Butyrivibrio 2                                                      | Absent in T1 | Absent in T2 | 460.55%      | Absent in T0   | Absent in both | Absent in T0   | Absent in both | Absent in both | Absent in T0   |
| Butyrivibrio                                                        | Absent in T1 | Absent in T2 | 692.72%      | -76.19%        | -89.67%        | -52.47%        | -97.37%        | Absent in T2   | -21.91%        |
| Coprococcus 2                                                       | -25.24%      | -77.79%      | -22.89%      | 10.22%         | -7.26%         | 108.60%        | -43.29%        | -2.41%         | 183.30%        |
| Coprococcus 3                                                       | -83.33%      | -78.20%      | 1.52%        | -32.14%        | 44.28%         | -33.00%        | -81.19%        | -70.15%        | -26.39%        |
| Dorea                                                               | -98.30%      | Absent in T2 | -89.35%      | -85.49%        | -93.96%        | -54.83%        | -96.06%        | -98.18%        | -88.16%        |
| Eisenbergiella                                                      | -63.08%      | 137.69%      | -64.66%      | 44.63%         | -26.92%        | -56.44%        | -57.85%        | -90.27%        | -79.73%        |
| Eubacterium eligens group (Lachnospiraceae family)                  | -35.65%      | 352.00%      | 94.72%       | -12.88%        | -70.81%        | 41.91%         | 814.24%        | -25.58%        | 1234.04%       |
| Eubacterium fissicatena group (Lachnospiraceae family)              | -65.84%      | -22.55%      | 15.69%       | -38.52%        | -46.95%        | -32.54%        | -75.01%        | -46.02%        | 143.84%        |
| Eubacterium hallii group (Lachnospiraceae family)                   | -88.19%      | -62.03%      | 153.61%      | 0.26%          | -34.29%        | 33.98%         | -94.36%        | -85.12%        | 101.19%        |
| Eubacterium ruminantium group (Lachnospiraceae family)              | -63.83%      | -90.68%      | 53.72%       | Absent in T1   | -20.78%        | 144.09%        | 1549.35%       | -29.29%        | 514.30%        |
| Eubacterium uniforme                                                | 428.42%      | 218.90%      | Absent in T3 | Absent in both | Absent in both | Absent in both | Absent in T0   | Absent in T0   | Absent in both |
| Eubacterium ventriosum group (Lachnospiraceae family)               | 1099.51%     | 2072.48%     | -7.79%       | 29.56%         | 122.70%        | 77.95%         | 2277.81%       | 689.34%        | 21.93%         |
| Fusicatenibacter                                                    | Absent in T1 | 3540.10%     | Absent in T3 | -6.60%         | -53.69%        | -76.41%        | -75.51%        | Absent in T2   | 88.20%         |

|                                                              |                |                |              |                |                |              |                |                |              |
|--------------------------------------------------------------|----------------|----------------|--------------|----------------|----------------|--------------|----------------|----------------|--------------|
| Howardella                                                   | Absent in T1   | Absent in T2   | Absent in T3 | Absent in T0   | Absent in T0   | Absent in T0 | Absent in T1   | Absent in T2   | -58.77%      |
| Hungatella                                                   | 122.68%        | Absent in T2   | 27.16%       | -19.92%        | 35.23%         | -26.35%      | Absent in T0   | Absent in both | Absent in T0 |
| Lachnoanaerobaculum                                          | -0.12%         | 148.05%        | 88.64%       | -14.14%        | 83.51%         | 154.26%      | -12.44%        | 87.01%         | 175.43%      |
| Lachnoclostridium 10                                         | -49.53%        | Absent in T2   | -95.95%      | -34.60%        | -73.43%        | 208.53%      | -51.94%        | -14.11%        | Absent in T3 |
| Lachnoclostridium                                            | -46.38%        | -90.10%        | 83.13%       | 43.38%         | -27.21%        | 247.04%      | 336.56%        | -49.48%        | 558.29%      |
| Lachnospiraceae FCS020 group                                 | -64.25%        | -71.50%        | -25.04%      | -47.83%        | -45.40%        | -29.94%      | -67.76%        | -84.40%        | -1.14%       |
| Lachnospiraceae ND3007 group                                 | -42.18%        | -83.86%        | -47.49%      | -80.26%        | -92.18%        | -69.65%      | 62.45%         | Absent in T2   | -3.53%       |
| Lachnospiraceae NK3A20 group                                 | -84.97%        | -94.00%        | -69.06%      | -27.25%        | 37.90%         | -55.34%      | -76.53%        | -96.11%        | -78.52%      |
| Lachnospiraceae NK4A136 group                                | -92.54%        | -79.71%        | 114.06%      | -0.37%         | 17.90%         | 128.93%      | -91.28%        | -85.93%        | 96.22%       |
| Lachnospiraceae NK4B4 group                                  | -99.70%        | -99.16%        | -88.66%      | -50.27%        | 2.74%          | 94.80%       | -95.81%        | Absent in T2   | -74.38%      |
| Lachnospiraceae UCG-001                                      | -43.65%        | 45.74%         | -5.71%       | 107.85%        | 323.23%        | -34.47%      | 43.14%         | 48.69%         | 73.41%       |
| Lachnospiraceae UCG-006                                      | -45.97%        | 28.10%         | -14.44%      | 65.86%         | 33.60%         | -16.39%      | -44.63%        | -77.91%        | 3.86%        |
| Lachnospiraceae UCG-010                                      | -53.80%        | -34.94%        | 13.63%       | -27.46%        | -6.36%         | -7.01%       | -79.43%        | -48.72%        | 8.80%        |
| Lachnospiraceae XPB1014 group                                | -84.37%        | -87.54%        | 7.47%        | 30.06%         | -56.84%        | -53.13%      | -86.78%        | -82.49%        | -16.19%      |
| Lachnospira                                                  | -89.98%        | -83.61%        | -5.69%       | -22.84%        | -75.33%        | -49.65%      | -8.51%         | 4.50%          | 572.88%      |
| Marvinbryantia                                               | -76.74%        | 4085.56%       | -60.66%      | 100.39%        | -88.57%        | -94.86%      | Absent in T1   | -57.86%        | 11.71%       |
| Mobilitalea                                                  | 1.59%          | 11.08%         | 178.81%      | 29.49%         | -27.27%        | -69.88%      | -66.06%        | -83.91%        | -42.93%      |
| Moryella                                                     | Absent in T1   | Absent in T2   | -78.32%      | 650.26%        | 298.83%        | 167.27%      | Absent in T1   | -86.97%        | -82.82%      |
| Oribacterium                                                 | -93.88%        | -80.97%        | 1.90%        | -68.36%        | -77.36%        | -75.45%      | -97.11%        | -86.70%        | 53.05%       |
| Roseburia                                                    | -43.97%        | 5.06%          | 32.70%       | -15.46%        | -22.65%        | 13.43%       | -56.27%        | -80.45%        | -49.72%      |
| Ruminococcus gnavus group (Lachnospiraceae family)           | -53.33%        | 121.75%        | -61.19%      | -8.73%         | -35.32%        | -27.51%      | -35.52%        | -46.01%        | -66.01%      |
| Syntrophococcus                                              | Absent in T1   | -5.57%         | 68.77%       | -45.10%        | -40.83%        | 24.15%       | Absent in T1   | Absent in T2   | -89.14%      |
| Tyzzereella 3                                                | -91.28%        | -62.84%        | 3.69%        | -15.18%        | 200.79%        | 117.90%      | 52.54%         | -82.67%        | 4.23%        |
| Tyzzereella 4                                                | -94.72%        | Absent in T2   | -30.46%      | -4.31%         | -29.65%        | -0.29%       | -92.15%        | Absent in T2   | -63.41%      |
| Tyzzereella                                                  | -49.97%        | -71.53%        | -35.97%      | -25.30%        | -44.82%        | -32.88%      | -29.79%        | -77.21%        | -37.69%      |
| U. m. of Lachnospiraceae family                              | -63.36%        | -53.61%        | 11.46%       | 56.42%         | 1.47%          | 18.41%       | -67.05%        | -72.79%        | 29.02%       |
| Peptococcus                                                  | -67.75%        | 93.91%         | 117.53%      | 12.20%         | -54.71%        | -30.25%      | -51.47%        | 135.74%        | 308.30%      |
| U. m. of Peptococcaceae family                               | -77.23%        | -44.24%        | 22.63%       | -29.67%        | -53.62%        | 52.26%       | -90.29%        | -74.27%        | -34.07%      |
| Peptoclostridium                                             | Absent in T1   | Absent in T2   | 18.50%       | Absent in both | Absent in both | Absent in T0 | Absent in both | Absent in both | Absent in T0 |
| Peptostreptococcus                                           | Absent in both | Absent in both | Absent in T0 | Absent in both | Absent in both | Absent in T0 | Absent in both | Absent in both | Absent in T0 |
| Romboutsia                                                   | -97.77%        | -99.41%        | -56.01%      | -37.53%        | 18.99%         | -48.21%      | -92.63%        | -97.60%        | -17.66%      |
| Terrisporobacter                                             | -53.07%        | Absent in T2   | 286.89%      | 27.74%         | -8.08%         | 320.22%      | 22.61%         | Absent in T2   | 62.32%       |
| U. m. of Peptostreptococcaceae family                        | -97.14%        | Absent in T2   | -76.39%      | 61.04%         | 59.90%         | -79.05%      | Absent in T1   | Absent in T2   | -87.23%      |
| Anaerofilum                                                  | -21.71%        | -71.00%        | 4.63%        | -53.87%        | 7.03%          | 98.95%       | -17.58%        | -36.78%        | 32.56%       |
| Anaerotruncus                                                | -67.16%        | -50.06%        | -32.60%      | -10.18%        | 10.83%         | 12.55%       | -61.56%        | -67.68%        | -15.73%      |
| Butyricicoccus                                               | -62.09%        | -54.72%        | -30.58%      | -41.77%        | -20.43%        | -27.88%      | 13.16%         | -52.71%        | 34.57%       |
| Candidatus Soleaferrea                                       | 76.65%         | 64.05%         | 28.88%       | -29.35%        | -60.38%        | -9.02%       | -18.61%        | -62.64%        | -43.23%      |
| Caproiciproducens                                            | -50.58%        | -52.21%        | -7.67%       | 265.77%        | 262.24%        | 420.73%      | -85.98%        | -46.63%        | 0.93%        |
| Eubacterium coprostanoligenes group (Ruminococcaceae family) | -7.78%         | -60.76%        | 32.76%       | -3.59%         | 26.91%         | 28.90%       | -30.12%        | -61.71%        | 10.47%       |
| Faecalibacterium                                             | -41.18%        | 587.95%        | 49.11%       | 7.44%          | -57.68%        | 118.50%      | 654.72%        | 115.09%        | 1004.19%     |
| Flavonifractor                                               | -73.85%        | -84.21%        | -42.15%      | 28.12%         | 36.28%         | -10.99%      | -81.56%        | -82.16%        | -31.94%      |
| Hydrogenoanaerobacterium                                     | -51.58%        | -73.72%        | -25.25%      | -17.98%        | 5.63%          | -10.29%      | -17.83%        | -66.23%        | -17.88%      |
| Intestinimonas                                               | -46.08%        | -51.16%        | -11.04%      | 2.62%          | 1.40%          | 13.55%       | -38.41%        | -60.91%        | -4.54%       |
| Oscillibacter                                                | -47.09%        | -25.04%        | -7.19%       | -24.35%        | -7.26%         | -13.57%      | -44.83%        | -54.63%        | -0.96%       |
| Oscillospira                                                 | -9.29%         | -35.59%        | -31.51%      | -3.97%         | 23.07%         | 34.74%       | 14.88%         | -46.08%        | 59.56%       |
| Papillibacter                                                | -62.08%        | -8.77%         | -16.44%      | 35.18%         | 96.76%         | 37.78%       | -63.82%        | -73.10%        | -6.46%       |
| Ruminiclostridium 1                                          | Absent in T1   | Absent in T2   | -94.57%      | -85.04%        | 118.93%        | 256.48%      | Absent in T1   | Absent in T2   | 86.13%       |
| Ruminiclostridium 5                                          | 637.48%        | 206.23%        | 152.53%      | -6.15%         | -4.39%         | 59.07%       | 92.93%         | 38.35%         | 10.26%       |

|                                     |                |                |              |                |                |                |                |                |              |
|-------------------------------------|----------------|----------------|--------------|----------------|----------------|----------------|----------------|----------------|--------------|
| Ruminiclostridium 6                 | -66.41%        | -31.91%        | -55.83%      | -12.64%        | 25.51%         | 198.04%        | -74.48%        | -18.25%        | 8.30%        |
| Ruminiclostridium 9                 | -38.90%        | -40.18%        | 7.80%        | -7.41%         | -2.20%         | -2.08%         | -46.18%        | -56.31%        | -23.42%      |
| Ruminiclostridium                   | -69.79%        | -74.87%        | -24.99%      | -24.13%        | -23.48%        | -16.82%        | -58.77%        | -81.63%        | 27.61%       |
| Ruminococcaceae NK4A214 group       | -22.69%        | -45.85%        | -15.05%      | -64.12%        | -18.79%        | -21.30%        | -21.04%        | -22.40%        | 8.72%        |
| Ruminococcaceae UCG-002             | -29.21%        | -14.00%        | 14.44%       | -20.69%        | -40.47%        | -28.98%        | -48.79%        | -63.99%        | 20.49%       |
| Ruminococcaceae UCG-003             | -93.79%        | Absent in T2   | -73.86%      | 341.82%        | Absent in T2   | 201.91%        | Absent in T0   | Absent in both | Absent in T0 |
| Ruminococcaceae UCG-004             | -37.94%        | -34.66%        | -11.57%      | -48.89%        | -33.54%        | 12.85%         | -44.45%        | -27.34%        | -31.80%      |
| Ruminococcaceae UCG-005             | 20.16%         | -22.59%        | -57.95%      | -61.00%        | 41.55%         | -17.40%        | 610.91%        | 253.58%        | 34.35%       |
| Ruminococcaceae UCG-007             | 46.24%         | 28.69%         | 199.53%      | -30.41%        | -9.83%         | -7.60%         | -6.55%         | -43.88%        | 16.67%       |
| Ruminococcaceae UCG-009             | -77.37%        | -59.75%        | -37.25%      | -11.41%        | -9.68%         | 0.68%          | -61.77%        | -71.32%        | 11.53%       |
| Ruminococcaceae UCG-010             | -40.37%        | -54.64%        | -37.11%      | 6.81%          | 32.27%         | 8.80%          | -26.31%        | -54.02%        | -10.07%      |
| Ruminococcaceae UCG-013             | -50.33%        | -54.19%        | 25.57%       | -56.46%        | 3.24%          | -34.68%        | -66.41%        | -80.62%        | 1.83%        |
| Ruminococcaceae UCG-014             | -67.96%        | -89.60%        | -23.79%      | -44.74%        | -52.24%        | -54.82%        | -62.97%        | 48.51%         | -61.09%      |
| Ruminococcaceae V9D2013 group       | -73.15%        | -94.05%        | 11.70%       | 77.77%         | 27.07%         | 48.52%         | Absent in T1   | -83.81%        | -12.11%      |
| Ruminococcus 1                      | -77.24%        | -67.23%        | -35.12%      | 3.93%          | 83.45%         | 24.26%         | -8.25%         | -66.81%        | -10.14%      |
| Ruminococcus 2                      | 150.66%        | 15.69%         | 90.30%       | -66.51%        | -12.90%        | 24.81%         | -44.03%        | -86.66%        | -62.29%      |
| Sporobacter                         | 7.58%          | -62.15%        | 28.16%       | 15.32%         | 25.86%         | 40.77%         | -46.81%        | -72.07%        | -42.60%      |
| Subdoligranulum                     | -64.82%        | -97.51%        | 171.97%      | 122.80%        | -60.94%        | 204.70%        | 629.65%        | 22.33%         | 1302.82%     |
| U. m. of Ruminococcaceae family     | 0.68%          | -29.68%        | -1.87%       | -10.63%        | -12.01%        | -8.72%         | -40.59%        | -50.27%        | -24.37%      |
| U. m. of Clostridiales order        | -35.46%        | -51.15%        | -17.80%      | -28.21%        | -5.14%         | -29.06%        | -19.34%        | -62.66%        | -30.90%      |
| Allobaculum                         | 1495.27%       | -7.53%         | -78.81%      | 96.91%         | 163.75%        | -82.23%        | 2336.68%       | 205.18%        | -32.90%      |
| Candidatus Stoquefichus             | 21848.77%      | 13543.55%      | 89.33%       | -88.62%        | 12.01%         | 20.55%         | 31389.94%      | 8069.85%       | 178.72%      |
| Catenibacterium                     | Absent in both | Absent in both | Absent in T0 | Absent in both | Absent in both | Absent in T0   | Absent in T0   | Absent in both | Absent in T0 |
| Dielma                              | 249.94%        | 73.41%         | 923.78%      | Absent in T1   | Absent in T2   | Absent in T3   | -33.91%        | Absent in T2   | -90.05%      |
| Erysipelatoclostridium              | -70.09%        | -67.94%        | 37.07%       | -19.63%        | 1.09%          | 164.79%        | -91.22%        | Absent in T2   | 43.21%       |
| Erysipelotrichaceae UCG-002         | Absent in T1   | Absent in T2   | 282.81%      | Absent in both | Absent in both | Absent in T0   | Absent in both | Absent in both | Absent in T0 |
| Erysipelotrichaceae UCG-003         | 23.45%         | 70.20%         | -28.28%      | -76.13%        | 7.53%          | -30.39%        | 904.94%        | 128.78%        | -21.82%      |
| Faecalibaculum                      | 90.93%         | -21.01%        | 26.35%       | -33.94%        | 762.77%        | 451.60%        | 19.47%         | -15.20%        | 83.16%       |
| Holdemanella                        | Absent in T0   | Absent in both | Absent in T0 | Absent in both | Absent in T0   | Absent in T0   | Absent in T0   | Absent in T0   | Absent in T0 |
| Turicibacter                        | -65.22%        | -55.81%        | -32.84%      | -74.85%        | -32.88%        | -82.20%        | -80.71%        | -80.40%        | -61.81%      |
| U. m. of Erysipelotrichaceae family | 359.74%        | 3.80%          | 18.77%       | -24.96%        | 77.27%         | -31.93%        | 139.96%        | 52.49%         | -2.44%       |
| Enterococcus                        | 475.72%        | 542.50%        | 664.15%      | -19.09%        | 6.74%          | 916.95%        | 921.53%        | 609.91%        | 769.27%      |
| Lactobacillus                       | 41.14%         | -70.51%        | -29.55%      | 17.63%         | -70.04%        | -46.13%        | -5.36%         | -36.48%        | -43.72%      |
| Lactococcus                         | -83.33%        | -91.11%        | -17.55%      | -72.62%        | -38.33%        | 117.27%        | 207.41%        | Absent in T2   | 1363.90%     |
| Streptococcus                       | 17.93%         | -66.96%        | 173.01%      | -23.53%        | -22.21%        | 60.53%         | -53.18%        | -73.57%        | -24.58%      |
| Acidaminococcus                     | 93.63%         | Absent in T2   | 199.17%      | Absent in T0   | Absent in both | Absent in T0   | 151.80%        | Absent in T2   | 448.10%      |
| Phascolarctobacterium               | -34.67%        | 1998.83%       | 722.34%      | 1178.90%       | 21.28%         | 7637.55%       | Absent in T0   | Absent in T0   | Absent in T0 |
| Anaerovibrio                        | 180.33%        | 184.41%        | 45.08%       | -11.46%        | 11.16%         | -12.04%        | 163.44%        | 18.78%         | -1.58%       |
| Dialister                           | 44.63%         | -90.06%        | 252.81%      | Absent in T0   | Absent in T0   | Absent in T0   | 603.52%        | 30.20%         | 145.04%      |
| Megamonas                           | -87.58%        | Absent in T2   | 458.82%      | -51.67%        | -59.19%        | 298.75%        | Absent in both | Absent in T0   | Absent in T0 |
| Megasphaera                         | 40.79%         | Absent in T2   | -21.15%      | Absent in both | Absent in both | Absent in T0   | Absent in both | Absent in both | Absent in T0 |
| Quinella                            | 0.50%          | 83.34%         | 126.69%      | -40.81%        | -34.37%        | -56.05%        | -73.67%        | -65.08%        | -42.17%      |
| Veillonella                         | -36.43%        | -65.25%        | 62.01%       | -27.99%        | -36.73%        | 9.48%          | -64.42%        | -61.07%        | 34.04%       |
| U. m. of Veillonellaceae family     | 14.71%         | 37.22%         | 60.99%       | -15.85%        | 39.82%         | 47.34%         | -7.27%         | -13.50%        | -6.37%       |
| U. m. of Selenomonadales order      | 410.86%        | 76.89%         | 94.02%       | -39.76%        | 87.31%         | 17.45%         | 109.68%        | 244.09%        | 34.39%       |
| U. m. of Firmicutes phylum          | 4.19%          | -19.57%        | 128.70%      | -8.06%         | 30.75%         | -12.37%        | -26.33%        | 8.32%          | 6.99%        |
| Cetobacterium                       | Absent in T1   | Absent in T2   | 59.25%       | Absent in both | Absent in both | Absent in both | Absent in both | Absent in both | Absent in T0 |
| Fusobacterium                       | -77.99%        | -81.24%        | 42.48%       | -41.24%        | -11.45%        | 57.48%         | 134.51%        | 90.26%         | 241.74%      |

|                                     |                |                |                |                |                |                |                |                |                |
|-------------------------------------|----------------|----------------|----------------|----------------|----------------|----------------|----------------|----------------|----------------|
| Anaerobiospirillum                  | -71.10%        | -42.56%        | Absent in T3   | -27.22%        | -58.30%        | -73.77%        | -83.50%        | -67.17%        | -9.20%         |
| Succinivibrio                       | -92.74%        | -96.17%        | 603.76%        | Absent in T0   | Absent in T0   | Absent in T0   | 31.43%         | -32.93%        | 3380.54%       |
| U. m. of Succinivibrionaceae family | -82.90%        | -95.33%        | 388.52%        | -19.95%        | 77.95%         | 163.78%        | -87.44%        | -48.69%        | 311.24%        |
| U. m. of Aeromonadales order        | Absent in T1   | -0.93%         | 47.62%         | -35.21%        | -33.62%        | 24.11%         | -89.10%        | -78.13%        | -57.94%        |
| Parasutterella                      | -40.29%        | 29.49%         | -53.48%        | -57.84%        | 189.88%        | 26.61%         | 105.74%        | 162.55%        | -3.15%         |
| Sutterella                          | -36.55%        | -79.68%        | 293.91%        | Absent in T0   | Absent in both | Absent in T0   | 2020.32%       | 587.79%        | 2795.85%       |
| U. m. of CM1G08 family              | Absent in T1   | Absent in T2   | Absent in T3   | Absent in T1   | -73.13%        | 111.71%        | Absent in both | Absent in both | Absent in T0   |
| U. m. of Burkholderiales order      | -83.56%        | 52.38%         | 165.30%        | -30.05%        | 854.62%        | 302.18%        | -88.77%        | -40.63%        | 244.17%        |
| Helicobacter                        | -59.57%        | -16.90%        | 0.29%          | -39.81%        | -10.17%        | -33.64%        | -36.34%        | -19.49%        | 63.57%         |
| Caulobacter                         | Absent in T0   | Absent in both | Absent in T0   | Absent in T1   | -22.65%        | Absent in T3   | 144.06%        | 56.63%         | Absent in T3   |
| U. m. of Cellvibrionales order      | Absent in T1   | Absent in T2   | Absent in T3   | Absent in T0   | Absent in T0   | Absent in T0   | Absent in T1   | -45.36%        | Absent in T3   |
| Bilophila                           | 146.85%        | Absent in T2   | 7.02%          | -87.15%        | -38.94%        | 45.70%         | -26.31%        | Absent in T2   | -35.99%        |
| Desulfovibrio                       | -11.41%        | -23.43%        | 47.63%         | 0.55%          | 32.32%         | 32.13%         | -62.42%        | -62.38%        | -19.35%        |
| Citrobacter                         | -83.10%        | Absent in T2   | 261.00%        | Absent in T0   | Absent in T0   | Absent in T0   | 524.23%        | Absent in T2   | 1216.23%       |
| Enterobacter                        | -30.96%        | -74.46%        | 227.27%        | 203.89%        | -62.92%        | 798.60%        | 3320.48%       | 691.81%        | 6254.64%       |
| Escherichia-Shigella                | 80.96%         | -78.51%        | 308.58%        | 919.64%        | 710.66%        | 3454.00%       | 128.18%        | 48.52%         | 292.70%        |
| Hafnia-Obesumbacterium              | Absent in both | Absent in both | Absent in T0   | Absent in T1   | 86.53%         | 294.65%        | Absent in T0   | Absent in both | Absent in T0   |
| Klebsiella                          | -55.27%        | -89.25%        | 360.88%        | 1178.90%       | Absent in T2   | 3192.53%       | 356.39%        | 9.59%          | 1638.37%       |
| Salmonella                          | Absent in T0   | Absent in T0   | Absent in T0   | 40.79%         | 331.95%        | 530.71%        | Absent in T0   | Absent in both | Absent in T0   |
| Serratia                            | 463.16%        | Absent in T2   | 619.35%        | Absent in T0   | Absent in both | Absent in T0   | Absent in T0   | Absent in T0   | Absent in T0   |
| U. m. of Enterobacteriaceae family  | 90.66%         | -81.32%        | 443.05%        | Absent in T1   | 185.22%        | 975.95%        | 162.16%        | Absent in T2   | 1218.61%       |
| Haemophilus                         | Absent in T0   | Absent in both | Absent in T0   | Absent in T0   | Absent in T0   | Absent in T0   | Absent in T0   | Absent in both | Absent in both |
| Necropsobacter                      | -63.06%        | 145.35%        | 115.01%        | 28.34%         | 6.80%          | 90.01%         | -86.55%        | -3.12%         | 64.56%         |
| Pasteurella                         | -60.30%        | -19.36%        | 75.76%         | -25.96%        | -18.75%        | -7.15%         | -30.97%        | -9.88%         | -21.75%        |
| U. m. of Pasteurellaceae family     | Absent in both | Absent in T0   | Absent in both | 123.29%        | 37.55%         | 76.92%         | Absent in both | Absent in T0   | Absent in T0   |
| Acinetobacter                       | 40.79%         | Absent in T2   | 690.12%        | Absent in both | Absent in T0   | Absent in T0   | Absent in T0   | Absent in both | Absent in T0   |
| Enhydrobacter                       | Absent in T0   | Absent in both | Absent in both | Absent in T1   | Absent in T2   | 126.35%        | Absent in T0   | Absent in T0   | Absent in both |
| Paracoccus                          | Absent in T0   | Absent in both | Absent in T0   | Absent in T0   | Absent in both | Absent in T0   | Absent in T0   | Absent in T0   | Absent in both |
| U. m. of Rhodospirillaceae family   | -46.94%        | 129.49%        | 74.97%         | -26.17%        | 209.89%        | 1.10%          | 204.65%        | 281.53%        | 200.26%        |
| Vibrio                              | -44.49%        | Absent in T2   | -31.18%        | Absent in both | Absent in both | Absent in T0   | Absent in both | Absent in both | Absent in T0   |
| Stenotrophomonas                    | 81.11%         | 107.96%        | -87.66%        | 155.78%        | 271.27%        | -46.42%        | 276.40%        | 472.03%        | 712.25%        |
| U. m. of Proteobacteria phylum      | -42.98%        | -18.26%        | -41.16%        | 3.11%          | -28.09%        | -8.39%         | -72.60%        | -54.79%        | -0.57%         |
| U. m. of Saccharibacteria phylum    | 1.78%          | -82.58%        | 39.85%         | -17.16%        | -0.94%         | -36.20%        | -57.05%        | -86.64%        | -48.67%        |
| Treponema 2                         | 29.17%         | 705.53%        | 180.45%        | 3.13%          | 557.56%        | 439.06%        | -47.89%        | 1020.66%       | 197.34%        |
| Anaeroplasm                         | Absent in T1   | Absent in T2   | -58.52%        | -32.14%        | 66.84%         | -38.90%        | -95.02%        | Absent in T2   | -93.28%        |
| U. m. of Mollicutes RF9 order       | -76.57%        | -86.31%        | 34.40%         | -40.16%        | -15.10%        | -59.92%        | -64.97%        | -83.46%        | -60.41%        |
| U. m. of Mycoplasmataceae family    | 206.42%        | 393.69%        | 222.58%        | 21.02%         | 940.05%        | 328.65%        | -25.99%        | 134.35%        | 20.77%         |
| U. m. of Opitutae vadinHA64 order   | Absent in T1   | -49.24%        | -20.39%        | -20.76%        | 241.27%        | -13.47%        | Absent in both | Absent in T0   | Absent in both |
| U. m. of Verrucomicrobia phylum     | -89.87%        | -15.57%        | -74.30%        | 12.01%         | 34.26%         | -78.47%        | 7.08%          | -41.25%        | 129.05%        |
| Akkermansia                         | 138.74%        | -60.59%        | 508.48%        | -38.47%        | -73.32%        | 72.37%         | 604.27%        | 72.65%         | 292.85%        |
| U. m. of Verrucomicrobiaceae family | Absent in T0   | Absent in both | Absent in T0   | Absent in both | Absent in T0   | Absent in both | Absent in T0   | Absent in both | Absent in T0   |
| U. m. of Bacteria kingdom           | -30.99%        | 113.38%        | -10.26%        | -51.54%        | 123.40%        | -75.60%        | -62.04%        | -22.61%        | -82.36%        |
| Others                              | -66.65%        | 118.94%        | 55.32%         | -81.52%        | 183.01%        | -92.25%        | -56.82%        | -32.54%        | -87.31%        |

Trend (effect of treatment respect to T0 controls) at genus level

| Taxonomy                                     | CG    |       |       | Breve2L |       |       | CG+Breve2L |       |       |
|----------------------------------------------|-------|-------|-------|---------|-------|-------|------------|-------|-------|
|                                              | T0-T1 | T0-T2 | T0-T3 | T0-T1   | T0-T2 | T0-T3 | T0-T1      | T0-T2 | T0-T3 |
| U. m. of Euryarchaeota phylum                | -     | -     | -     | -       | +     | -     | -          | -     | -     |
| Actinomyces                                  | +     | -     | +     | -       | -     | -     | -          | -     | -     |
| Bifidobacterium                              | +     | -     | +     | +       | +     | +     | +          | -     | +     |
| Gardnerella                                  | +     | -     | +     | -       | -     | -     | +          | -     | +     |
| Adlercreutzia                                | +     | -     | -     | +       | +     | +     | +          | -     | -     |
| Atopobium                                    | +     | -     | +     | -       | -     | -     | -          | -     | +     |
| Collinsella                                  | -     | +     | +     | +       | +     | +     | +          | +     | +     |
| Coriobacteriaceae UCG-002                    | +     | +     | -     | -       | +     | -     | +          | +     | -     |
| Enterorhabdus                                | -     | -     | +     | -       | +     | +     | -          | -     | -     |
| Gordonibacter                                | +     | -     | +     | -       | +     | -     | +          | +     | +     |
| Parvibacter                                  | -     | -     | +     | +       | +     | +     | -          | -     | +     |
| Senegalimassilia                             | -     | +     | +     | -       | +     | -     | -          | -     | +     |
| U. m. of Coriobacteriaceae family            | +     | -     | +     | -       | -     | -     | -          | -     | -     |
| Corynebacterium                              | -     | +     | -     | -       | -     | +     | +          | -     | +     |
| Microbacterium                               | +     | -     | +     | -       | -     | +     | +          | -     | +     |
| U. m. of Microbacteriaceae family            | +     | -     | -     | -       | -     | -     | +          | -     | -     |
| Rothia                                       | -     | -     | +     | -       | -     | +     | +          | -     | +     |
| U. m. of Micrococcaceae family               | +     | -     | +     | -       | -     | +     | +          | +     | +     |
| Propionibacterium                            | -     | -     | -     | +       | +     | +     | +          | +     | +     |
| U. m. of Actinobacteria phylum               | -     | -     | -     | -       | +     | +     | -          | -     | -     |
| Bacteroides                                  | -     | -     | -     | -       | -     | -     | -          | -     | +     |
| U. m. of Bacteroidales BS11 gut group family | -     | -     | +     | -       | +     | +     | -          | -     | +     |
| U. m. of Bacteroidales RF16 group family     | -     | -     | +     | -       | -     | -     | -          | +     | -     |
| U. m. of Bacteroidales S24-7 group family    | +     | -     | -     | -       | +     | -     | +          | +     | -     |
| Barnesiella                                  | -     | -     | +     | -       | -     | +     | +          | -     | +     |
| Butyricimonas                                | -     | +     | -     | +       | +     | -     | +          | +     | +     |
| Coprobacter                                  | -     | -     | +     | -       | -     | +     | -          | -     | +     |
| Odoribacter                                  | -     | -     | -     | +       | +     | +     | -          | -     | +     |
| Parabacteroides                              | +     | +     | -     | -       | +     | +     | +          | +     | -     |
| U. m. of Porphyromonadaceae family           | -     | -     | +     | +       | +     | +     | -          | +     | +     |
| Alloprevotella                               | -     | -     | +     | -       | -     | +     | -          | +     | +     |
| Paraprevotella                               | -     | +     | -     | -       | -     | -     | -          | -     | +     |
| Prevotella 1                                 | +     | +     | -     | +       | -     | -     | +          | +     | -     |
| Prevotella 2                                 | +     | +     | -     | +       | +     | +     | +          | +     | -     |
| Prevotella 7                                 | -     | +     | -     | -       | -     | -     | +          | +     | -     |
| Prevotella 9                                 | +     | -     | +     | +       | +     | +     | +          | +     | +     |
| Prevotellaceae Ga6A1 group                   | -     | -     | +     | -       | -     | +     | -          | -     | +     |
| Prevotellaceae NK3B31 group                  | +     | +     | +     | +       | +     | +     | +          | +     | +     |
| Prevotellaceae UCG-001                       | -     | +     | +     | +       | +     | +     | -          | +     | +     |
| Prevotellaceae UCG-003                       | -     | +     | +     | +       | +     | -     | -          | +     | -     |
| Prevotellaceae UCG-004                       | -     | -     | -     | +       | +     | -     | -          | +     | -     |
| Prevotella                                   | -     | +     | -     | +       | +     | +     | -          | +     | -     |
| U. m. of Prevotellaceae family               | +     | +     | -     | -       | -     | +     | +          | +     | -     |
| Alistipes                                    | -     | -     | +     | -       | +     | +     | -          | -     | -     |

|                                                                     |   |   |   |   |   |   |   |   |   |
|---------------------------------------------------------------------|---|---|---|---|---|---|---|---|---|
| Rikenellaceae RC9 gut group                                         | - | + | + | - | + | + | - | - | + |
| Rikenella                                                           | - | - | - | - | + | + | - | - | - |
| U. m. of Rikenellaceae family                                       | - | - | - | - | + | + | - | - | - |
| U. m. of Bacteroidales order                                        | - | - | + | - | - | - | - | - | - |
| U. m. of Cytophagales order                                         | - | - | + | - | + | + | + | - | - |
| Cloacibacterium                                                     | - | + | - | - | - | - | - | - | - |
| Flavobacterium                                                      | + | + | + | - | - | - | - | + | - |
| U. m. of Bacteroidetes phylum                                       | - | - | - | - | + | + | + | - | + |
| U. m. of AKIW781 family                                             | - | - | - | - | - | - | - | - | - |
| U. m. of Cyanobacteria phylum                                       | + | - | - | - | + | + | + | + | + |
| U. m. of Gastranaerophilales order                                  | - | + | + | - | + | + | + | - | + |
| Mucispirillum                                                       | - | + | + | - | - | - | + | - | + |
| Anoxybacillus                                                       | + | - | + | - | - | - | - | + | - |
| Bacillus                                                            | - | - | - | - | - | + | - | - | - |
| Terribacillus                                                       | - | - | - | - | - | + | - | - | - |
| Gemella                                                             | - | - | + | - | - | - | - | - | - |
| Brochothrix                                                         | - | - | + | - | - | - | + | - | + |
| Listeria                                                            | - | - | + | - | - | - | + | - | + |
| Staphylococcus                                                      | + | + | + | - | + | - | + | + | + |
| Catabacter                                                          | + | - | + | - | - | - | + | - | + |
| Christensenellaceae R-7 group                                       | - | - | - | - | - | + | + | - | - |
| U. m. of Christensenellaceae family                                 | - | - | - | - | - | + | + | - | + |
| Clostridium sensu stricto 1                                         | - | - | + | - | + | - | + | - | + |
| U. m. of Clostridiales vadinBB60 group family                       | - | + | + | - | - | + | + | - | + |
| Defluviitaleaceae UCG-011                                           | + | + | + | - | + | + | + | - | + |
| Anaerofustis                                                        | - | - | - | - | + | + | - | - | - |
| Anaerovorax                                                         | - | - | + | - | - | - | - | - | - |
| Eubacterium nodatum group (Clostridiales order, Family XIII family) | - | - | - | - | - | - | - | - | - |
| Family XIII AD3011 group (Clostridiales order)                      | - | - | + | - | - | + | + | - | - |
| Family XIII UCG-001 (Clostridiales order)                           | - | - | + | - | + | + | + | - | - |
| Mogibacterium                                                       | - | - | - | - | - | + | - | - | - |
| U. m. of Family XIII family (Clostridiales order)                   | + | - | + | - | + | + | - | - | - |
| Acetatifactor                                                       | - | - | - | - | + | - | + | - | + |
| Anaerostipes                                                        | + | - | - | - | + | + | + | + | + |
| Blautia                                                             | - | - | - | - | - | - | - | + | + |
| Butyrivibrio 2                                                      | - | - | + | - | + | - | + | - | + |
| Butyrivibrio                                                        | - | - | + | - | - | - | - | - | - |
| Coprococcus 2                                                       | - | - | - | - | + | - | + | - | + |
| Coprococcus 3                                                       | - | - | + | - | - | + | - | - | - |
| Dorea                                                               | - | - | - | - | - | - | - | - | - |
| Eisenbergiella                                                      | - | + | - | - | + | - | - | - | - |
| Eubacterium eligens group (Lachnospiraceae family)                  | - | + | + | - | - | - | + | + | + |
| Eubacterium fissicatena group (Lachnospiraceae family)              | - | - | + | - | - | - | - | - | + |
| Eubacterium hallii group (Lachnospiraceae family)                   | - | - | + | - | + | - | + | - | + |
| Eubacterium ruminantium group (Lachnospiraceae family)              | - | - | + | - | - | - | + | - | + |
| Eubacterium uniforme                                                | + | + | - | - | - | - | - | + | + |
| Eubacterium ventriosum group (Lachnospiraceae family)               | + | + | - | - | + | + | + | + | + |
| Fusicatenibacter                                                    | - | + | - | - | - | - | - | - | + |



Howardella  
 Hungatella  
 Lachnoanaerobaculum  
 Lachnoclostridium 10  
 Lachnoclostridium  
 Lachnospiraceae FCS020 group  
 Lachnospiraceae ND3007 group  
 Lachnospiraceae NK3A20 group  
 Lachnospiraceae NK4A136 group  
 Lachnospiraceae NK4B4 group  
 Lachnospiraceae UCG-001  
 Lachnospiraceae UCG-006  
 Lachnospiraceae UCG-010  
 Lachnospiraceae XPB1014 group  
 Lachnospira  
 Marvinbryantia  
 Mobilitalea  
 Moryella  
 Oribacterium  
 Roseburia  
 Ruminococcus gnavus group (Lachnospiraceae family)  
 Syntrophococcus  
 Tyzzerella 3  
 Tyzzerella 4  
 Tyzzerella  
 U. m. of Lachnospiraceae family  
 Peptococcus  
 U. m. of Peptococcaceae family  
 Peptoclostridium  
 Peptostreptococcus  
 Romboutsia  
 Terrisporobacter  
 U. m. of Peptostreptococcaceae family  
 Anaerofilum  
 Anaerotruncus  
 Butyrivibrio  
 Candidatus Soleaferrea  
 Caproiciproducens  
 Eubacterium coprostanoligenes group (Ruminococcaceae family)  
 Faecalibacterium  
 Flavonifractor  
 Hydrogenoanaerobacterium  
 Intestinimonas  
 Oscillibacter  
 Oscillospira  
 Papillibacter  
 Ruminiclostridium 1  
 Ruminiclostridium 5

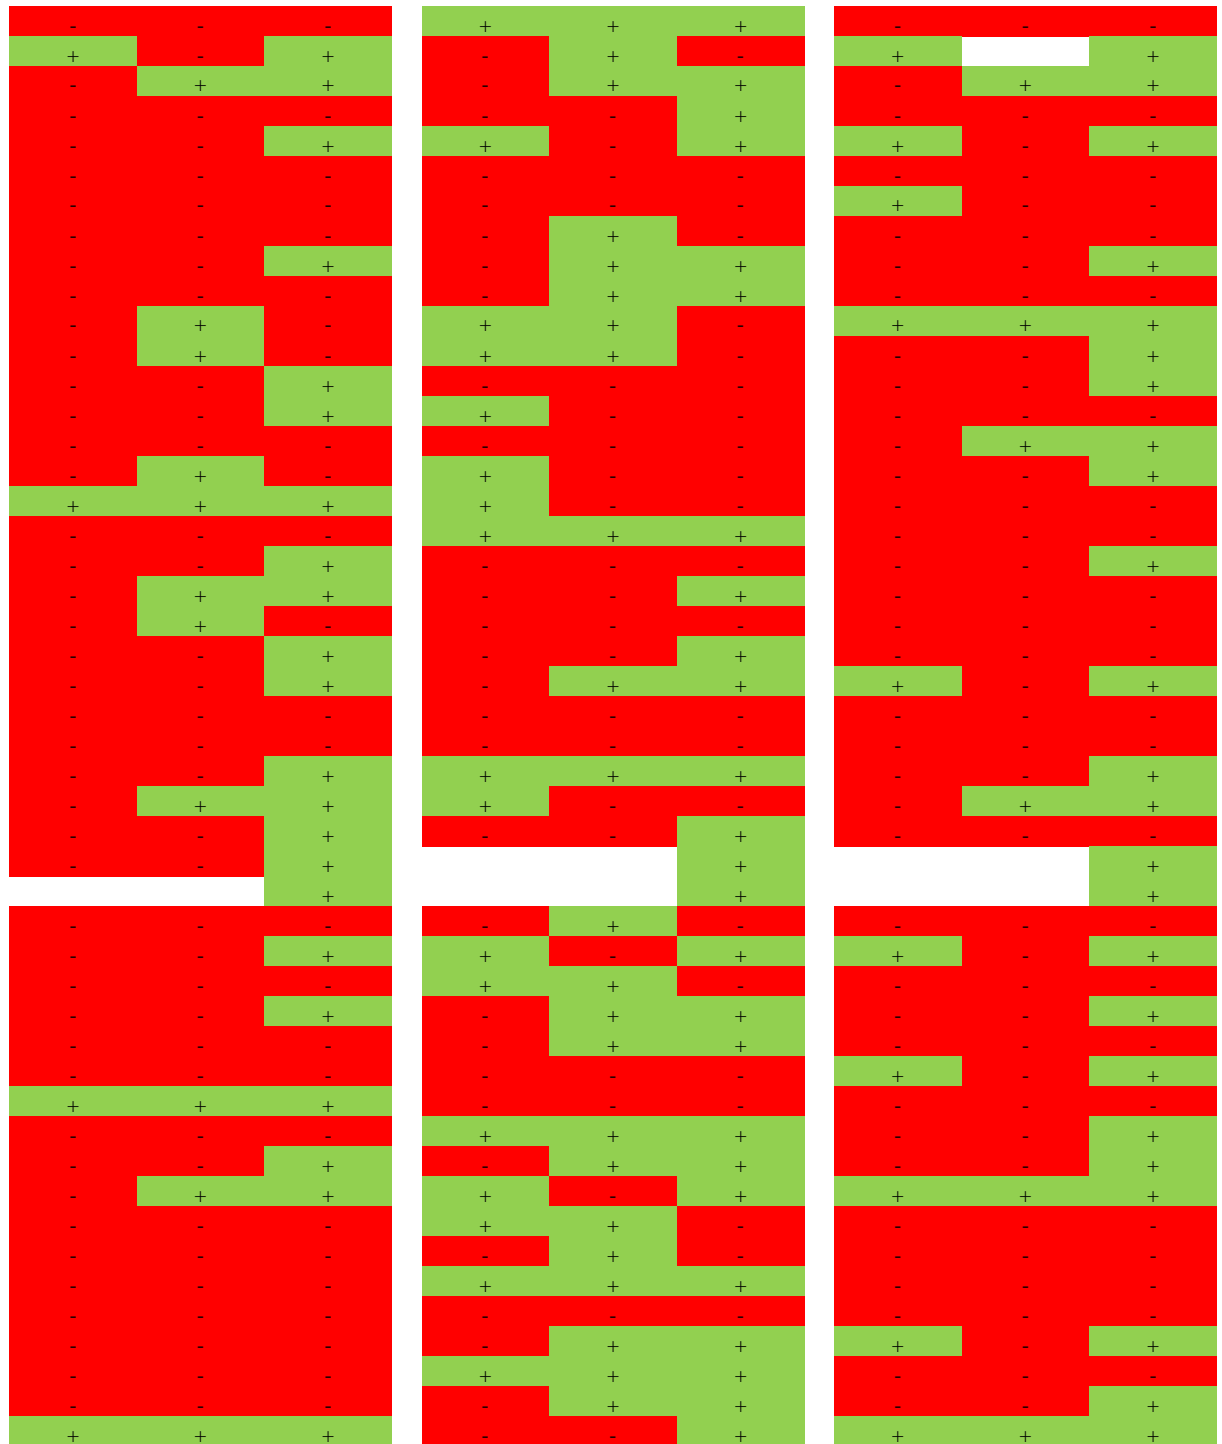

|                                     |   |   |   |   |   |   |   |   |   |   |
|-------------------------------------|---|---|---|---|---|---|---|---|---|---|
| Ruminiclostridium 6                 | - | - | - | - | + | + | - | - | - | + |
| Ruminiclostridium 9                 | - | - | + | - | - | - | - | - | - | - |
| Ruminiclostridium                   | - | - | - | - | - | - | - | - | - | + |
| Ruminococcaceae NK4A214 group       | - | - | - | - | - | - | - | - | - | + |
| Ruminococcaceae UCG-002             | - | - | + | - | - | - | - | - | - | + |
| Ruminococcaceae UCG-003             | - | - | - | - | + | - | + | + | - | + |
| Ruminococcaceae UCG-004             | - | - | - | - | - | - | - | + | - | - |
| Ruminococcaceae UCG-005             | + | - | - | - | - | + | - | - | - | + |
| Ruminococcaceae UCG-007             | + | + | + | - | - | - | - | - | - | + |
| Ruminococcaceae UCG-009             | - | - | - | - | - | - | - | + | - | + |
| Ruminococcaceae UCG-010             | - | - | - | - | + | + | + | - | - | - |
| Ruminococcaceae UCG-013             | - | - | + | - | - | + | - | - | - | + |
| Ruminococcaceae UCG-014             | - | - | - | - | - | - | - | - | + | - |
| Ruminococcaceae V9D2013 group       | - | - | + | - | + | + | + | - | - | - |
| Ruminococcus 1                      | - | - | - | - | + | + | + | - | - | - |
| Ruminococcus 2                      | + | + | + | - | - | - | + | - | - | - |
| Sporobacter                         | + | - | + | - | + | + | + | - | - | - |
| Subdoligranulum                     | - | - | + | - | + | - | + | + | + | + |
| U. m. of Ruminococcaceae family     | + | - | - | - | - | - | - | - | - | - |
| U. m. of Clostridiales order        | - | - | - | - | - | - | - | - | - | - |
| Allobaculum                         | + | - | - | - | + | + | - | + | + | - |
| Candidatus Stoquefichus             | + | + | + | - | + | + | + | + | + | + |
| Catenibacterium                     | - | - | + | - | - | - | + | + | + | + |
| Dielma                              | + | + | + | - | - | - | - | - | - | - |
| Erysipelatoclostridium              | - | - | + | - | + | + | + | - | - | + |
| Erysipelotrichaceae UCG-002         | - | - | + | - | - | - | + | - | - | + |
| Erysipelotrichaceae UCG-003         | + | + | - | - | - | + | - | + | + | - |
| Faecalibaculum                      | + | - | + | - | + | + | + | + | - | + |
| Holdemanella                        | + | - | + | - | + | + | + | + | + | + |
| Turicibacter                        | - | - | - | - | - | - | - | - | - | - |
| U. m. of Erysipelotrichaceae family | + | + | + | - | + | - | - | + | + | - |
| Enterococcus                        | + | + | + | - | + | + | + | + | + | + |
| Lactobacillus                       | + | - | - | - | + | - | - | - | - | - |
| Lactococcus                         | - | - | - | - | - | - | + | + | - | + |
| Streptococcus                       | + | - | + | - | - | - | + | - | - | - |
| Acidaminococcus                     | + | - | + | - | + | - | + | + | - | + |
| Phascolarctobacterium               | - | + | + | - | + | + | + | + | + | + |
| Anaerovibrio                        | + | + | + | - | + | - | - | + | + | - |
| Dialister                           | + | - | + | - | + | + | + | + | + | + |
| Megamonas                           | - | - | + | - | - | - | + | - | + | + |
| Megasphaera                         | + | - | - | - | - | - | + | - | - | + |
| Quinella                            | + | + | + | - | - | - | - | - | - | - |
| Veillonella                         | - | - | + | - | - | - | + | - | - | + |
| U. m. of Veillonellaceae family     | + | + | + | - | + | + | + | - | - | - |
| U. m. of Selenomonadales order      | + | + | + | - | + | + | + | + | + | + |
| U. m. of Firmicutes phylum          | + | - | + | - | + | - | - | - | + | + |
| Cetobacterium                       | - | - | + | - | - | - | - | - | - | + |
| Fusobacterium                       | - | - | + | - | - | - | + | + | + | + |

Anaerobiospirillum  
 Succinivibrio  
 U. m. of Succinivibrionaceae family  
 U. m. of Aeromonadales order  
 Parasutterella  
 Sutterella  
 U. m. of CM1G08 family  
 U. m. of Burkholderiales order  
 Helicobacter  
 Caulobacter  
 U. m. of Cellvibrionales order  
 Bilophila  
 Desulfovibrio  
 Citrobacter  
 Enterobacter  
 Escherichia-Shigella  
 Hafnia-Obesumbacterium  
 Klebsiella  
 Salmonella  
 Serratia  
 U. m. of Enterobacteriaceae family  
 Haemophilus  
 Necropsobacter  
 Pasteurella  
 U. m. of Pasteurellaceae family  
 Acinetobacter  
 Enhydrobacter  
 Paracoccus  
 U. m. of Rhodospirillaceae family  
 Vibrio  
 Stenotrophomonas  
 U. m. of Proteobacteria phylum  
 U. m. of Saccharibacteria phylum  
 Treponema 2  
 Anaeroplasma  
 U. m. of Mollicutes RF9 order  
 U. m. of Mycoplasmataceae family  
 U. m. of Opitutae vadinHA64 order  
 U. m. of Verrucomicrobia phylum  
 Akkermansia  
 U. m. of Verrucomicrobiaceae family  
 U. m. of Bacteria kingdom  
 Others

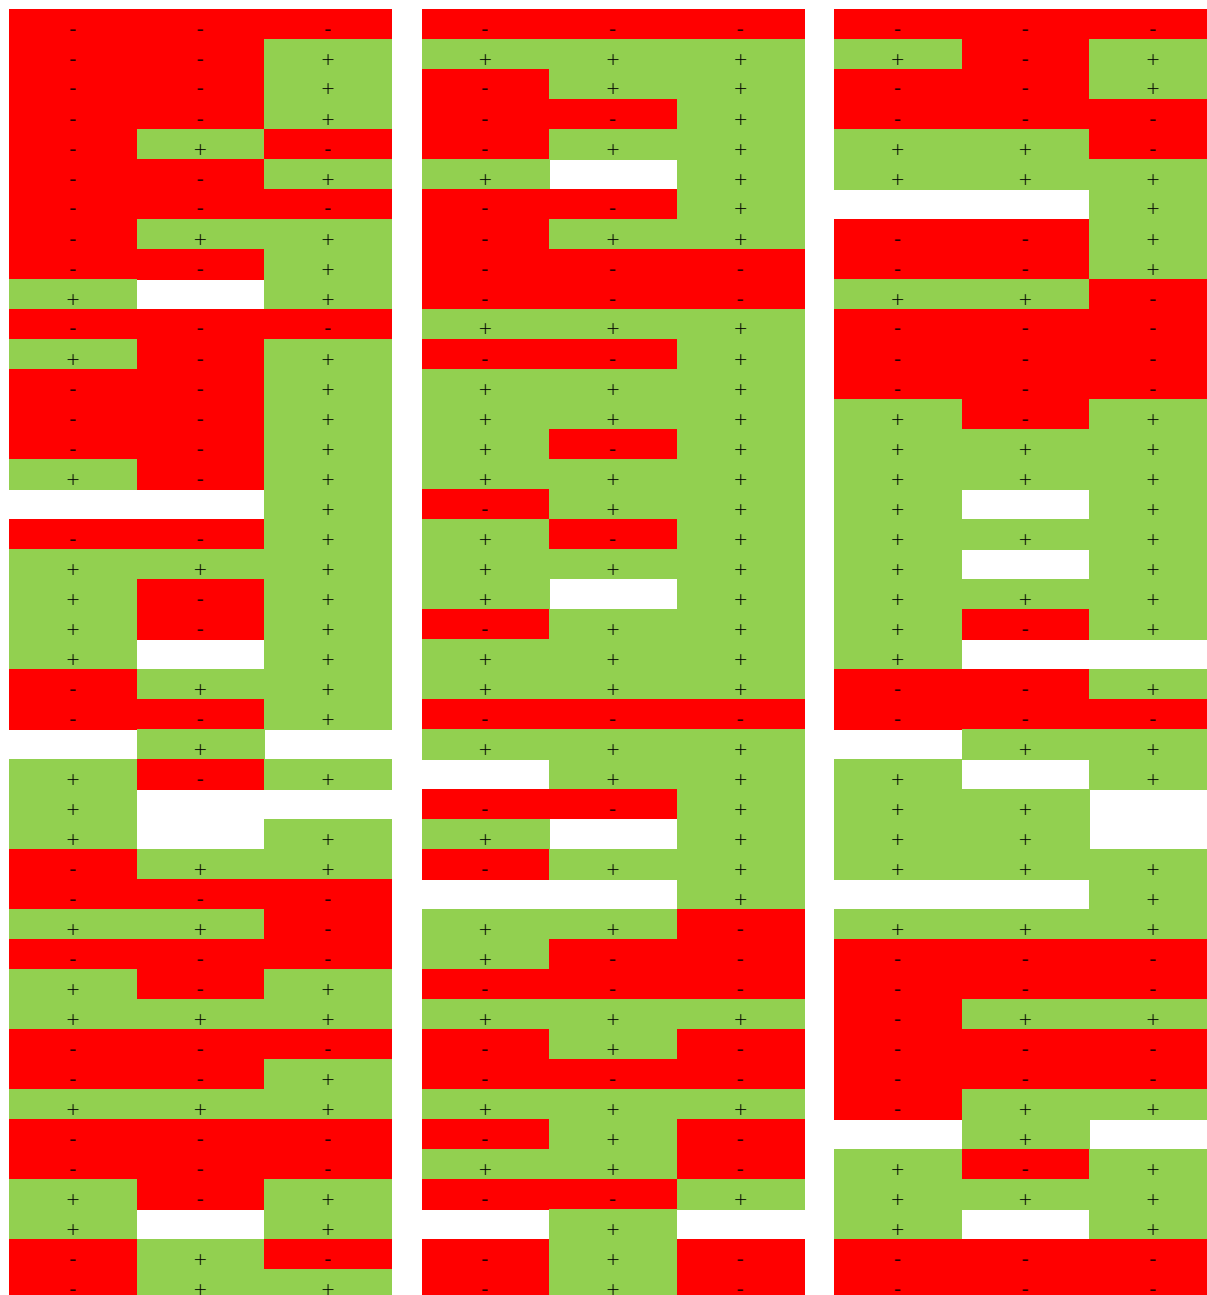

| Taxonomy                                     | p-value at genus level |                |                |                |                |                |                |                |                |
|----------------------------------------------|------------------------|----------------|----------------|----------------|----------------|----------------|----------------|----------------|----------------|
|                                              | CG                     |                |                | Breve2L        |                |                | CG+Breve2L     |                |                |
|                                              | T <sub>1</sub>         | T <sub>2</sub> | T <sub>3</sub> | T <sub>1</sub> | T <sub>2</sub> | T <sub>3</sub> | T <sub>1</sub> | T <sub>2</sub> | T <sub>3</sub> |
| U. m. of Euryarchaeota phylum                |                        | 0.035          | 0.035          |                | 0.035          |                |                |                | 0.002          |
| Actinomyces                                  |                        |                |                |                |                |                |                | 0.045          | 0.033          |
| Bifidobacterium                              |                        |                | 0.012          |                |                | 0.011          |                |                |                |
| Gardnerella                                  |                        | 0.035          |                |                |                |                |                | 0.035          |                |
| Adlercreutzia                                |                        |                |                |                |                |                |                |                |                |
| Atopobium                                    |                        | 0.026          |                |                |                |                |                |                |                |
| Collinsella                                  |                        |                |                |                | 0.004          | 0.011          |                | 0.045          | 0.002          |
| Coriobacteriaceae UCG-002                    | 0.010                  | 0.014          |                |                |                |                |                |                |                |
| Enterorhabdus                                |                        |                |                |                |                |                | 0.014          | 0.009          |                |
| Gordonibacter                                |                        |                |                |                |                | 0.003          |                |                |                |
| Parvibacter                                  | 0.000                  | 0.010          |                | 0.035          | 0.003          | 0.000          | 0.035          | 0.035          |                |
| Senegalimassilia                             |                        | 0.035          | 0.001          |                | 0.038          |                |                |                | 0.019          |
| U. m. of Coriobacteriaceae family            |                        |                |                | 0.018          |                |                | 0.005          | 0.000          | 0.000          |
| Corynebacterium                              |                        |                |                |                |                | 0.001          | 0.031          | 0.035          |                |
| Microbacterium                               |                        | 0.035          |                |                |                | 0.035          | 0.035          |                | 0.000          |
| U. m. of Microbacteriaceae family            |                        | 0.035          |                |                |                |                | 0.004          |                |                |
| Rothia                                       | 0.000                  | 0.000          | 0.029          |                |                | 0.016          | 0.020          |                | 0.001          |
| U. m. of Micrococcaceae family               |                        |                | 0.044          |                |                |                |                |                |                |
| Propionibacterium                            |                        |                |                |                | 0.045          |                | 0.011          |                |                |
| U. m. of Actinobacteria phylum               | 0.000                  |                |                |                | 0.003          | 0.035          | 0.009          | 0.011          |                |
| Bacteroides                                  | 0.034                  |                |                |                | 0.049          | 0.041          |                | 0.008          |                |
| U. m. of Bacteroidales BS11 gut group family | 0.035                  | 0.035          |                |                | 0.035          | 0.034          |                |                | 0.000          |
| U. m. of Bacteroidales RF16 group family     | 0.033                  |                |                |                |                |                |                |                |                |
| U. m. of Bacteroidales S24-7 group family    |                        |                |                |                |                | 0.045          |                |                |                |
| Barnesiella                                  |                        | 0.003          |                |                | 0.004          |                |                | 0.002          | 0.001          |
| Butyricimonas                                |                        |                |                |                |                |                | 0.029          | 0.035          |                |
| Coprobacter                                  |                        |                | 0.036          |                |                | 0.035          |                |                | 0.001          |
| Odoribacter                                  |                        |                |                |                |                |                |                |                | 0.042          |
| Parabacteroides                              |                        |                | 0.019          |                |                |                | 0.003          |                |                |
| U. m. of Porphyromonadaceae family           |                        |                | 0.002          |                | 0.015          |                |                |                | 0.012          |
| Alloprevotella                               |                        |                |                |                |                |                |                |                |                |
| Paraprevotella                               |                        | 0.048          |                | 0.019          | 0.007          |                |                |                |                |
| Prevotella 1                                 |                        |                |                |                |                |                |                |                | 0.010          |
| Prevotella 2                                 |                        | 0.001          |                |                |                |                |                |                | 0.049          |
| Prevotella 7                                 |                        |                | 0.029          |                |                |                |                |                |                |
| Prevotella 9                                 |                        | 0.012          | 0.007          |                | 0.046          | 0.038          | 0.041          |                |                |
| Prevotellaceae Ga6A1 group                   |                        |                | 0.000          |                |                |                |                |                | 0.035          |
| Prevotellaceae NK3B31 group                  |                        |                | 0.003          | 0.013          |                | 0.020          |                |                | 0.001          |
| Prevotellaceae UCG-001                       |                        |                | 0.023          |                |                | 0.018          |                |                |                |
| Prevotellaceae UCG-003                       |                        |                |                |                |                |                |                |                |                |
| Prevotellaceae UCG-004                       | 0.000                  | 0.010          | 0.005          |                |                | 0.001          | 0.035          |                |                |
| Prevotella                                   |                        | 0.036          | 0.010          |                |                |                | 0.026          |                | 0.038          |
| U. m. of Prevotellaceae family               |                        |                |                | 0.025          |                |                |                |                | 0.003          |
| Alistipes                                    |                        |                |                |                | 0.036          |                |                |                |                |

|                                                                     |       |       |       |  |       |       |       |       |       |       |
|---------------------------------------------------------------------|-------|-------|-------|--|-------|-------|-------|-------|-------|-------|
| Rikenellaceae RC9 gut group                                         |       |       |       |  |       |       |       |       |       |       |
| Rikenella                                                           | 0.000 | 0.000 | 0.001 |  | 0.002 |       |       | 0.000 | 0.000 | 0.000 |
| U. m. of Rikenellaceae family                                       | 0.001 | 0.000 | 0.026 |  | 0.022 | 0.035 |       | 0.010 |       |       |
| U. m. of Bacteroidales order                                        |       |       |       |  |       |       |       |       |       |       |
| U. m. of Cytophagales order                                         | 0.006 | 0.039 |       |  | 0.047 | 0.017 |       | 0.028 | 0.028 |       |
| Cloacibacterium                                                     |       |       | 0.030 |  | 0.035 | 0.035 | 0.035 |       |       | 0.035 |
| Flavobacterium                                                      | 0.000 | 0.035 | 0.004 |  |       |       |       | 0.021 |       | 0.035 |
| U. m. of Bacteroidetes phylum                                       |       |       |       |  |       |       |       |       |       |       |
| U. m. of AKIW781 family                                             | 0.035 | 0.035 | 0.035 |  |       |       |       |       |       |       |
| U. m. of Cyanobacteria phylum                                       |       |       |       |  |       |       |       | 0.036 | 0.016 |       |
| U. m. of Gastranaerophilales order                                  |       | 0.034 | 0.000 |  |       | 0.048 | 0.028 | 0.037 | 0.037 |       |
| Mucispirillum                                                       | 0.030 |       |       |  | 0.008 |       |       |       |       |       |
| Anoxybacillus                                                       |       | 0.035 |       |  |       |       |       | 0.039 |       |       |
| Bacillus                                                            |       |       |       |  |       |       |       | 0.036 | 0.000 | 0.000 |
| Terribacillus                                                       | 0.009 | 0.001 | 0.001 |  | 0.004 |       | 0.005 |       | 0.035 |       |
| Gemella                                                             | 0.005 | 0.000 |       |  | 0.036 |       |       |       | 0.039 |       |
| Brochothrix                                                         | 0.035 | 0.035 |       |  |       |       | 0.001 |       |       | 0.035 |
| Listeria                                                            | 0.035 | 0.035 |       |  |       |       | 0.035 |       |       | 0.000 |
| Staphylococcus                                                      | 0.005 |       | 0.042 |  |       |       |       | 0.001 |       |       |
| Catabacter                                                          |       | 0.035 |       |  |       |       |       | 0.001 | 0.001 |       |
| Christensenellaceae R-7 group                                       |       | 0.029 | 0.011 |  |       |       |       | 0.044 |       |       |
| U. m. of Christensenellaceae family                                 |       |       |       |  |       |       |       | 0.013 | 0.033 |       |
| Clostridium sensu stricto 1                                         | 0.003 | 0.001 |       |  |       | 0.037 | 0.028 |       |       |       |
| U. m. of Clostridiales vadinBB60 group family                       |       | 0.016 |       |  |       |       |       |       |       |       |
| Defluviitaleaceae UCG-011                                           | 0.000 | 0.001 | 0.020 |  |       |       |       |       |       |       |
| Anaerofustis                                                        | 0.007 | 0.007 |       |  |       |       |       | 0.003 | 0.003 |       |
| Anaerovorax                                                         |       |       | 0.007 |  |       |       | 0.047 | 0.009 | 0.005 |       |
| Eubacterium nodatum group (Clostridiales order, Family XIII family) | 0.012 |       |       |  |       |       |       | 0.000 | 0.000 | 0.000 |
| Family XIII AD3011 group (Clostridiales order)                      |       |       |       |  |       |       |       |       |       |       |
| Family XIII UCG-001 (Clostridiales order)                           |       |       |       |  |       |       | 0.016 |       |       | 0.020 |
| Mogibacterium                                                       |       |       |       |  | 0.009 | 0.008 | 0.001 |       |       | 0.003 |
| U. m. of Family XIII family (Clostridiales order)                   |       |       |       |  |       |       |       |       |       |       |
| Acetatifactor                                                       | 0.000 | 0.000 |       |  |       |       |       | 0.000 | 0.002 | 0.001 |
| Anaerostipes                                                        |       | 0.010 |       |  |       |       |       |       |       | 0.030 |
| Blautia                                                             | 0.039 |       | 0.034 |  |       |       |       | 0.000 |       |       |
| Butyrivibrio 2                                                      | 0.006 | 0.006 | 0.040 |  | 0.035 |       | 0.000 |       |       | 0.000 |
| Butyrivibrio                                                        | 0.032 | 0.032 | 0.042 |  |       |       |       | 0.042 | 0.036 |       |
| Coprococcus 2                                                       |       | 0.046 |       |  |       |       | 0.024 |       |       |       |
| Coprococcus 3                                                       | 0.006 | 0.021 |       |  |       |       |       | 0.024 |       |       |
| Dorea                                                               | 0.000 | 0.000 | 0.000 |  | 0.039 | 0.034 |       | 0.028 | 0.024 | 0.039 |
| Eisenbergiella                                                      |       |       | 0.006 |  | 0.044 |       |       | 0.034 | 0.002 | 0.003 |
| Eubacterium eligens group (Lachnospiraceae family)                  |       |       |       |  |       | 0.013 |       | 0.001 |       | 0.006 |
| Eubacterium fissicatena group (Lachnospiraceae family)              |       |       |       |  |       |       |       |       |       |       |
| Eubacterium hallii group (Lachnospiraceae family)                   | 0.018 |       |       |  |       |       |       | 0.002 | 0.005 |       |
| Eubacterium ruminantium group (Lachnospiraceae family)              |       | 0.015 |       |  | 0.000 |       |       | 0.009 |       |       |
| Eubacterium uniforme                                                |       |       | 0.035 |  |       |       |       | 0.035 | 0.012 |       |
| Eubacterium ventriosum group (Lachnospiraceae family)               | 0.002 | 0.016 |       |  |       |       |       | 0.001 | 0.008 |       |
| Fusicatenibacter                                                    | 0.006 | 0.039 | 0.006 |  |       |       |       | 0.002 | 0.000 |       |

|                                                              |       |       |       |       |       |       |       |       |       |
|--------------------------------------------------------------|-------|-------|-------|-------|-------|-------|-------|-------|-------|
| Howardella                                                   | 0.035 | 0.035 | 0.035 | 0.035 | 0.035 | 0.035 | 0.000 | 0.000 |       |
| Hungatella                                                   |       | 0.035 |       |       |       |       | 0.035 |       | 0.000 |
| Lachnoanaerobaculum                                          |       |       |       |       | 0.037 | 0.031 |       | 0.008 | 0.019 |
| Lachnoclostridium 10                                         |       | 0.004 | 0.005 |       |       |       |       |       | 0.000 |
| Lachnoclostridium                                            |       | 0.008 |       |       |       | 0.045 | 0.037 |       | 0.002 |
| Lachnospiraceae FCS020 group                                 |       | 0.007 |       |       |       |       |       |       |       |
| Lachnospiraceae ND3007 group                                 |       | 0.004 |       |       | 0.041 |       |       | 0.001 |       |
| Lachnospiraceae NK3A20 group                                 |       | 0.037 |       |       | 0.017 | 0.039 |       | 0.011 | 0.041 |
| Lachnospiraceae NK4A136 group                                | 0.004 | 0.008 |       |       |       | 0.002 | 0.000 | 0.002 |       |
| Lachnospiraceae NK4B4 group                                  | 0.036 | 0.036 | 0.048 |       |       | 0.026 | 0.033 | 0.018 |       |
| Lachnospiraceae UCG-001                                      | 0.028 |       |       |       | 0.025 |       |       |       |       |
| Lachnospiraceae UCG-006                                      |       |       |       |       |       |       |       | 0.002 |       |
| Lachnospiraceae UCG-010                                      |       |       |       |       |       |       |       |       |       |
| Lachnospiraceae XPB1014 group                                |       |       |       |       | 0.032 | 0.015 | 0.004 | 0.008 |       |
| Lachnospira                                                  | 0.001 | 0.012 |       |       |       |       |       |       | 0.002 |
| Marvinbryantia                                               |       | 0.037 |       |       | 0.014 | 0.007 | 0.020 |       |       |
| Mobilitalea                                                  |       |       |       |       |       |       |       | 0.023 |       |
| Moryella                                                     | 0.000 | 0.000 | 0.002 |       | 0.016 |       | 0.002 |       |       |
| Oribacterium                                                 | 0.032 |       |       |       | 0.039 |       | 0.004 | 0.037 |       |
| Roseburia                                                    |       |       |       |       |       |       |       | 0.008 | 0.017 |
| Ruminococcus gnavus group (Lachnospiraceae family)           |       |       |       |       |       |       |       |       | 0.001 |
| Syntrophococcus                                              | 0.035 |       |       |       |       |       | 0.027 | 0.027 |       |
| Tyzzereella 3                                                | 0.009 |       |       |       | 0.035 |       |       | 0.012 |       |
| Tyzzereella 4                                                | 0.021 | 0.008 |       |       |       |       | 0.007 | 0.002 |       |
| Tyzzereella                                                  |       |       |       |       |       |       |       |       | 0.024 |
| U. m. of Lachnospiraceae family                              | 0.030 | 0.021 |       |       | 0.030 | 0.038 | 0.010 | 0.009 |       |
| Peptococcus                                                  | 0.026 |       |       |       |       |       |       |       |       |
| U. m. of Peptococcaceae family                               | 0.027 |       |       |       |       |       | 0.000 | 0.001 |       |
| Peptoclostridium                                             | 0.035 | 0.035 |       |       |       | 0.035 |       |       | 0.010 |
| Peptostreptococcus                                           |       |       | 0.001 |       |       | 0.000 |       |       | 0.002 |
| Romboutsia                                                   | 0.000 | 0.000 | 0.001 |       |       |       | 0.046 | 0.041 |       |
| Terrisporobacter                                             |       | 0.035 |       |       |       | 0.014 |       | 0.001 |       |
| U. m. of Peptostreptococcaceae family                        | 0.001 | 0.001 | 0.012 |       |       | 0.036 | 0.035 | 0.035 |       |
| Anaerofilum                                                  |       | 0.026 |       |       | 0.043 |       |       |       |       |
| Anaerotruncus                                                | 0.001 |       |       |       |       |       |       |       |       |
| Butyricicoccus                                               | 0.016 |       |       |       |       | 0.031 |       |       |       |
| Candidatus Soleaferrea                                       |       |       |       |       |       |       |       |       |       |
| Caproiciproducens                                            |       |       |       |       | 0.007 | 0.011 | 0.014 |       |       |
| Eubacterium coprostanoligenes group (Ruminococcaceae family) |       |       |       |       |       |       |       |       |       |
| Faecalibacterium                                             | 0.032 |       |       |       |       |       | 0.001 |       | 0.003 |
| Flavonifractor                                               |       |       |       |       |       |       | 0.009 | 0.005 |       |
| Hydrogenoanaerobacterium                                     | 0.027 | 0.012 |       |       |       |       |       |       |       |
| Intestinimonas                                               |       |       |       |       |       |       |       |       |       |
| Oscillibacter                                                |       |       |       |       |       |       | 0.019 |       | 0.019 |
| Oscillospira                                                 |       |       |       |       |       |       |       |       |       |
| Papillibacter                                                |       |       |       |       |       | 0.013 |       |       |       |
| Ruminiclostridium 1                                          | 0.000 | 0.000 | 0.001 |       | 0.028 | 0.009 | 0.004 | 0.004 |       |
| Ruminiclostridium 5                                          | 0.001 |       | 0.027 |       |       | 0.000 |       | 0.024 |       |







## Supplementary File 2

| Taxonomy                                         | Bifidobacterial composition (%) |                |                |                |                |                |                |                |                |                |                |                |
|--------------------------------------------------|---------------------------------|----------------|----------------|----------------|----------------|----------------|----------------|----------------|----------------|----------------|----------------|----------------|
|                                                  | CG                              | CG             | CG             | CG             | Breve2L        | Breve2L        | Breve2L        | Breve2L        | CG+Breve2L     | CG+Breve2L     | CG+Breve2L     | CG+Breve2L     |
|                                                  | T <sub>0</sub>                  | T <sub>1</sub> | T <sub>2</sub> | T <sub>3</sub> | T <sub>0</sub> | T <sub>1</sub> | T <sub>2</sub> | T <sub>3</sub> | T <sub>0</sub> | T <sub>1</sub> | T <sub>2</sub> | T <sub>3</sub> |
|                                                  | Average                         | Average        | Average        | Average        | Average        | Average        | Average        | Average        | Average        | Average        | Average        | Average        |
| <i>B. adolescentis</i> biotype A                 | 1.39%                           | 1.79%          | 1.21%          | 1.88%          | 0.99%          | 1.38%          | 0.82%          | 2.12%          | 1.46%          | 1.58%          | 1.08%          | 3.86%          |
| <i>B. adolescentis</i> biotype B                 | 2.34%                           | 2.89%          | 2.08%          | 3.11%          | 0.91%          | 1.59%          | 1.80%          | 4.85%          | 4.30%          | 3.35%          | 2.52%          | 3.02%          |
| <i>B. adolescentis</i> biotype C                 | 3.22%                           | 2.44%          | 2.98%          | 2.26%          | 2.63%          | 1.47%          | 1.60%          | 2.32%          | 2.37%          | 3.11%          | 1.60%          | 2.08%          |
| <i>B. animalis</i> subsp <i>animalis</i>         | 0.99%                           | 0.37%          | 0.54%          | 1.15%          | 0.09%          | 0.01%          | 4.28%          | 7.94%          | 0.34%          | 0.20%          | 0.07%          | 1.78%          |
| <i>B. animalis</i> subsp <i>lactis</i>           | 3.36%                           | 4.54%          | 3.97%          | 0.98%          | 4.96%          | 1.75%          | 2.62%          | 1.11%          | 5.13%          | 6.12%          | 2.03%          | 1.08%          |
| <i>B. bifidum</i>                                | 2.76%                           | 1.26%          | 0.93%          | 1.58%          | 1.39%          | 0.46%          | 0.58%          | 1.03%          | 2.05%          | 0.94%          | 0.52%          | 0.19%          |
| <i>B. breve</i>                                  | 18.32%                          | 23.25%         | 20.03%         | 8.49%          | 21.51%         | 51.29%         | 44.44%         | 23.20%         | 28.83%         | 35.45%         | 39.23%         | 15.29%         |
| <i>B. dentium</i>                                | 0.02%                           | 1.40%          | 0.69%          | 0.16%          | 0.43%          | 0.15%          | 0.29%          | 0.57%          | 0.81%          | 0.40%          | 0.33%          | 0.34%          |
| <i>B. gallinarum</i>                             | 1.90%                           | 0.20%          | 0.07%          | 0.09%          | 0.22%          | 2.00%          | 0.05%          | 0.07%          | 0.04%          | 0.04%          | 0.05%          | 0.25%          |
| <i>B. kashiwanohense</i>                         | 0.01%                           | 0.58%          | 0.13%          | 0.01%          | 0.06%          | 1.22%          | 0.11%          | 0.04%          | 0.17%          | 0.15%          | 0.08%          | 0.17%          |
| <i>B. longum</i> subsp <i>longum</i>             | 5.97%                           | 4.54%          | 4.61%          | 0.91%          | 12.59%         | 3.54%          | 2.70%          | 3.85%          | 5.43%          | 4.29%          | 3.75%          | 1.07%          |
| <i>B. longum</i> subsp <i>suis</i>               | 1.69%                           | 1.12%          | 1.37%          | 1.57%          | 1.63%          | 1.47%          | 0.70%          | 1.22%          | 1.49%          | 1.26%          | 0.69%          | 0.54%          |
| <i>B. magnum</i>                                 | 0.73%                           | 1.89%          | 1.39%          | 3.19%          | 1.53%          | 0.14%          | 1.23%          | 0.50%          | 1.21%          | 2.19%          | 0.77%          | 0.65%          |
| <i>B. mongoliense</i>                            | 0.71%                           | 0.02%          | 0.19%          | 0.07%          | 0.22%          | 0.42%          | 0.13%          | 0.08%          | 0.16%          | 0.19%          | 1.43%          | 0.08%          |
| <i>B. myosotis</i>                               | 1.40%                           | 1.55%          | 0.05%          | 2.85%          | 0.00%          | 0.00%          | 1.10%          | 1.95%          | 0.08%          | 0.28%          | 0.22%          | 3.07%          |
| <i>B. pseudocatenulatum</i>                      | 0.38%                           | 0.48%          | 0.39%          | 1.35%          | 0.10%          | 0.01%          | 0.25%          | 0.11%          | 0.31%          | 0.34%          | 0.20%          | 0.12%          |
| <i>B. pseudolongum</i> subsp <i>globosum</i>     | 29.21%                          | 25.97%         | 37.04%         | 32.91%         | 35.95%         | 18.18%         | 14.17%         | 18.39%         | 27.29%         | 17.05%         | 22.31%         | 29.17%         |
| <i>B. pseudolongum</i> subsp <i>pseudolongum</i> | 8.72%                           | 7.22%          | 14.18%         | 12.81%         | 8.95%          | 5.30%          | 8.26%          | 7.87%          | 9.76%          | 7.20%          | 7.37%          | 11.80%         |
| <i>B. pseudolongum</i> subspp                    | 3.91%                           | 1.90%          | 1.96%          | 11.96%         | 1.01%          | 4.13%          | 5.36%          | 5.46%          | 1.48%          | 2.65%          | 8.84%          | 9.57%          |
| <i>B. reuteri</i>                                | 0.79%                           | 2.17%          | 1.71%          | 0.10%          | 1.59%          | 0.21%          | 0.90%          | 0.13%          | 1.68%          | 2.25%          | 0.56%          | 0.30%          |
| Putative new bifidobacterial species             | 10.68%                          | 12.13%         | 2.69%          | 12.09%         | 2.37%          | 4.72%          | 7.54%          | 15.54%         | 2.61%          | 8.73%          | 4.90%          | 14.72%         |

| Taxonomy                                         | Absolute variation (%) |        |        |         |         |         |         |            |         |  |
|--------------------------------------------------|------------------------|--------|--------|---------|---------|---------|---------|------------|---------|--|
|                                                  | T1-T0                  | CG     |        |         | Breve2L |         |         | CG+Breve2L |         |  |
|                                                  |                        | T2-T0  | T3-T0  | T1-T0   | T2-T0   | T3-T0   | T1-T0   | T2-T0      | T3-T0   |  |
| <i>B. adolescentis</i> biotype A                 | 0.40%                  | -0.18% | 0.49%  | 0.40%   | -0.16%  | 1.13%   | 0.12%   | -0.38%     | 2.40%   |  |
| <i>B. adolescentis</i> biotype B                 | 0.56%                  | -0.25% | 0.77%  | 0.68%   | 0.90%   | 3.94%   | -0.95%  | -1.79%     | -1.29%  |  |
| <i>B. adolescentis</i> biotype C                 | -0.78%                 | -0.24% | -0.95% | -1.16%  | -1.03%  | -0.31%  | 0.73%   | -0.77%     | -0.29%  |  |
| <i>B. animalis</i> subsp <i>animalis</i>         | -0.62%                 | -0.45% | 0.16%  | -0.07%  | 4.19%   | 7.85%   | -0.14%  | -0.28%     | 1.44%   |  |
| <i>B. animalis</i> subsp <i>lactis</i>           | 1.18%                  | 0.61%  | -2.38% | -3.22%  | -2.34%  | -3.85%  | 0.99%   | -3.10%     | -4.05%  |  |
| <i>B. bifidum</i>                                | -1.50%                 | -1.83% | -1.18% | -0.93%  | -0.81%  | -0.36%  | -1.11%  | -1.54%     | -1.86%  |  |
| <i>B. breve</i>                                  | 4.93%                  | 1.71%  | -9.84% | 29.78%  | 22.93%  | 1.68%   | 6.62%   | 10.40%     | -13.54% |  |
| <i>B. dentium</i>                                | 1.38%                  | 0.67%  | 0.13%  | -0.29%  | -0.14%  | 0.14%   | -0.41%  | -0.48%     | -0.47%  |  |
| <i>B. gallinarum</i>                             | -1.69%                 | -1.83% | -1.81% | 1.78%   | -0.18%  | -0.15%  | 0.00%   | 0.02%      | 0.21%   |  |
| <i>B. kashiwanohense</i>                         | 0.57%                  | 0.13%  | 0.01%  | 1.16%   | 0.04%   | -0.02%  | -0.01%  | -0.08%     | 0.00%   |  |
| <i>B. longum</i> subsp <i>longum</i>             | -1.43%                 | -1.37% | -5.06% | -9.05%  | -9.88%  | -8.73%  | -1.14%  | -1.67%     | -4.36%  |  |
| <i>B. longum</i> subsp <i>suis</i>               | -0.57%                 | -0.32% | -0.12% | -0.16%  | -0.93%  | -0.40%  | -0.23%  | -0.81%     | -0.95%  |  |
| <i>B. magnum</i>                                 | 1.16%                  | 0.66%  | 2.46%  | -1.38%  | -0.30%  | -1.02%  | 0.98%   | -0.45%     | -0.57%  |  |
| <i>B. mongoliense</i>                            | -0.69%                 | -0.53% | -0.64% | 0.20%   | -0.09%  | -0.14%  | 0.02%   | 1.27%      | -0.08%  |  |
| <i>B. myosotis</i>                               | 0.15%                  | -1.35% | 1.45%  | 0.00%   | 1.10%   | 1.95%   | 0.20%   | 0.14%      | 2.99%   |  |
| <i>B. pseudocatenulatum</i>                      | 0.10%                  | 0.01%  | 0.97%  | -0.08%  | 0.15%   | 0.01%   | 0.02%   | -0.12%     | -0.19%  |  |
| <i>B. pseudolongum</i> subsp <i>globosum</i>     | -3.24%                 | 7.84%  | 3.70%  | -17.77% | -21.78% | -17.56% | -10.25% | -4.98%     | 1.88%   |  |
| <i>B. pseudolongum</i> subsp <i>pseudolongum</i> | -1.51%                 | 5.46%  | 4.09%  | -3.64%  | -0.69%  | -1.07%  | -2.55%  | -2.38%     | 2.04%   |  |
| <i>B. pseudolongum</i> subspp                    | -2.01%                 | -1.95% | 8.05%  | 3.13%   | 4.35%   | 4.46%   | 1.17%   | 7.36%      | 8.09%   |  |
| <i>B. reuteri</i>                                | 1.38%                  | 0.91%  | -0.69% | -1.38%  | -0.68%  | -1.46%  | 0.57%   | -1.12%     | -1.38%  |  |
| Putative new bifidobacterial species             | 1.44%                  | -7.99% | 1.41%  | 2.34%   | 5.17%   | 13.17%  | 6.12%   | 2.29%      | 12.11%  |  |

Trend (effect of treatment respect to T0 controls)

| Taxonomy                                         | CG    |       |       | Breve2L |       |       | CG+Breve2L |       |       |
|--------------------------------------------------|-------|-------|-------|---------|-------|-------|------------|-------|-------|
|                                                  | T1-T0 | T2-T0 | T3-T0 | T1-T0   | T2-T0 | T3-T0 | T1-T0      | T2-T0 | T3-T0 |
| <i>B. adolescentis</i> biotype A                 | +     | -     | +     | +       | -     | +     | +          | -     | +     |
| <i>B. adolescentis</i> biotype B                 | +     | -     | +     | +       | +     | +     | -          | -     | -     |
| <i>B. adolescentis</i> biotype C                 | -     | -     | -     | -       | -     | -     | +          | -     | -     |
| <i>B. animalis</i> subsp <i>animalis</i>         | -     | -     | +     | -       | +     | +     | -          | -     | +     |
| <i>B. animalis</i> subsp <i>lactis</i>           | +     | +     | -     | -       | -     | -     | +          | -     | -     |
| <i>B. bifidum</i>                                | -     | -     | -     | -       | -     | -     | -          | -     | -     |
| <i>B. breve</i>                                  | +     | +     | -     | +       | +     | +     | +          | +     | -     |
| <i>B. dentium</i>                                | +     | +     | +     | -       | -     | +     | -          | -     | -     |
| <i>B. gallinarum</i>                             | -     | -     | -     | +       | -     | -     | +          | +     | +     |
| <i>B. kashiwanohense</i>                         | +     | +     | +     | +       | +     | -     | -          | -     | +     |
| <i>B. longum</i> subsp <i>longum</i>             | -     | -     | -     | -       | -     | -     | -          | -     | -     |
| <i>B. longum</i> subsp <i>suis</i>               | -     | -     | -     | -       | -     | -     | -          | -     | -     |
| <i>B. magnum</i>                                 | +     | +     | +     | -       | -     | -     | +          | -     | -     |
| <i>B. mongoliense</i>                            | -     | -     | -     | +       | -     | -     | +          | +     | -     |
| <i>B. myosotis</i>                               | +     | -     | +     | -       | +     | +     | +          | +     | +     |
| <i>B. pseudocatenulatum</i>                      | +     | +     | +     | -       | +     | +     | +          | -     | -     |
| <i>B. pseudolongum</i> subsp <i>globosum</i>     | -     | +     | +     | -       | -     | -     | -          | -     | +     |
| <i>B. pseudolongum</i> subsp <i>pseudolongum</i> | -     | +     | +     | -       | -     | -     | -          | -     | +     |
| <i>B. pseudolongum</i> subspp                    | -     | -     | +     | +       | +     | +     | +          | +     | +     |
| <i>B. reuteri</i>                                | +     | +     | -     | -       | -     | -     | +          | -     | -     |
| Putative new bifidobacterial species             | +     | -     | +     | +       | +     | +     | +          | +     | +     |

| Taxonomy                                         | CG    |       |       | t-test p-value < 0.05<br>Breve2L |       |       | CG+Breve2L |       |       |
|--------------------------------------------------|-------|-------|-------|----------------------------------|-------|-------|------------|-------|-------|
|                                                  | T1-T0 | T2-T0 | T3-T0 | T1-T0                            | T2-T0 | T3-T0 | T1-T0      | T2-T0 | T3-T0 |
| <i>B. adolescentis</i> biotype A                 |       | 0.022 |       |                                  |       |       |            |       |       |
| <i>B. adolescentis</i> biotype B                 |       |       |       |                                  |       |       |            |       |       |
| <i>B. adolescentis</i> biotype C                 |       |       |       |                                  |       |       |            |       |       |
| <i>B. animalis</i> subsp <i>animalis</i>         |       |       |       | 0.021                            | 0.014 |       |            | 0.004 | 0.020 |
| <i>B. animalis</i> subsp <i>lactis</i>           |       |       | 0.029 |                                  |       | 0.015 |            |       | 0.044 |
| <i>B. bifidum</i>                                |       | 0.016 |       |                                  |       |       | 0.030      | 0.009 | 0.008 |
| <i>B. breve</i>                                  |       |       |       |                                  |       |       |            |       |       |
| <i>B. dentium</i>                                |       |       | 0.001 |                                  |       |       |            |       |       |
| <i>B. gallinarum</i>                             | 0.017 | 0.006 | 0.034 |                                  | 0.000 | 0.044 |            |       |       |
| <i>B. kashiwanohense</i>                         |       | 0.036 |       |                                  |       |       |            |       |       |
| <i>B. longum</i> subsp <i>longum</i>             | 0.015 | 0.039 | 0.008 |                                  | 0.004 | 0.007 | 0.034      |       | 0.010 |
| <i>B. longum</i> subsp <i>suis</i>               |       |       |       |                                  |       |       |            | 0.001 |       |
| <i>B. magnum</i>                                 |       |       | 0.001 | 0.021                            |       |       |            |       |       |
| <i>B. mongoliense</i>                            | 0.011 | 0.030 | 0.042 |                                  |       |       |            |       |       |
| <i>B. myosotis</i>                               |       | 0.006 |       |                                  | 0.001 | 0.040 |            |       | 0.011 |
| <i>B. pseudocatenulatum</i>                      |       |       |       | 0.034                            |       |       |            |       |       |
| <i>B. pseudolongum</i> subsp <i>globosum</i>     |       |       |       | 0.041                            | 0.005 | 0.020 |            |       |       |
| <i>B. pseudolongum</i> subsp <i>pseudolongum</i> |       |       |       | 0.004                            | 0.014 |       |            |       |       |
| <i>B. pseudolongum</i> subspp                    |       | 0.027 |       | 0.001                            |       |       |            |       | 0.043 |
| <i>B. reuteri</i>                                |       |       |       | 0.000                            | 0.015 | 0.000 |            | 0.039 |       |
| Putative new bifidobacterial species             |       | 0.019 |       |                                  | 0.002 | 0.002 | 0.001      | 0.033 | 0.010 |
