# Supplementary material for: Ability of bifidobacteria to metabolize chitin-glucan and its impact on the gut microbiota
Source: PubMed Central journal article supplement (PMC6453949; doi:10.1038/s41598-019-42257-z), 2019-04-08
Supplement: 41598_2019_42257_MOESM2_ESM.pdf [file 41598_2019_42257_MOESM2_ESM.pdf]

1 **Ability of bifidobacteria to metabolize chitin-glucan and its impact on the gut microbiota**

2 **Key words:** Bifidobacterium, prebiotics, gut microbiota, microbe-microbe interactions

3 **Running title:** Bifidobacteria and chitin glucan

4

5 Giulia Alessandri<sup>1#</sup>, Christian Milani<sup>2#</sup>, Sabrina Duranti<sup>2#</sup>, Leonardo Mancabelli<sup>2</sup>, Thibaut  
6 Ranjanoro<sup>3</sup>, Salvatore Modica<sup>3</sup>, Luca Carnevali<sup>4</sup>, Rosario Statello<sup>4</sup>, Francesca Bottacini<sup>5</sup>,  
7 Francesca Turroni<sup>2</sup>, Maria Cristina Ossiprandi<sup>1</sup>, Andrea Sgoifo<sup>4</sup>, Dowue van Sinderen<sup>5</sup> and  
8 Marco Ventura<sup>1</sup>

9 # These authors contributed equally

10

11 Department of Veterinary Medical Science, University of Parma, Parma, Italy<sup>1</sup>; Laboratory of  
12 Probiogenomics, Department of Chemistry, Life Sciences, and Environmental Sustainability,  
13 University of Parma, Parma, Italy<sup>2</sup>; KitoZyme, Belgium<sup>3</sup>; Stress Physiology Laboratory,  
14 Department of Chemistry, Life Sciences and Environmental Sustainability, University of Parma,  
15 Parma, Italy<sup>4</sup>; APC Microbiome Institute and School of Microbiology, Bioscience Institute,  
16 National University of Ireland, Cork, Ireland<sup>5</sup>

17

18

19 Correspondence. Mailing address for Marco Ventura; Laboratory of Probiogenomics, Department  
20 of Chemistry, Life Sciences, and Environmental Sustainability, University of Parma, Parco Area  
21 delle Scienze 11a, 43124 Parma, Italy. Phone: ++39-521-905666. Fax: ++39-521-905604. E-mail:  
22 marco.ventura@unipr.it

**Table S1:** The 100 most over-expressed genes in *B. breve* 2L cultivated in MRS +CG, sorted by CG average RPKM.

| ORFs     | CG average RPKM | MRS average RPKM | CG expression induction CG/MRS | Length (aa) | Annotation                                                      |
|----------|-----------------|------------------|--------------------------------|-------------|-----------------------------------------------------------------|
| B2L_0179 | 34762           | 16321            | 2.1                            | 38          | LSU ribosomal protein L36P                                      |
| B2L_0967 | 24685           | 4987             | 4.9                            | 308         | <b>Solute binding protein of ABC transporter system</b>         |
| B2L_1102 | 21932           | 15616            | 1.4                            | 90          | SSU ribosomal protein S15P                                      |
| B2L_1128 | 16109           | 7300             | 2.2                            | 65          | LSU ribosomal protein L32P                                      |
| B2L_0970 | 15117           | 922              | 16.4                           | 114         | Ferric uptake regulation protein                                |
| B2L_0141 | 14921           | 13773            | 1.1                            | 150         | 50S ribosomal protein L13                                       |
| B2L_0944 | 12433           | 12016            | 1                              | 400         | Protein Translation Elongation Factor Tu (EF-TU)                |
| B2L_0407 | 10895           | 7863             | 1.4                            | 94          | DNA-binding protein HU                                          |
| B2L_0166 | 9512            | 6684             | 1.4                            | 123         | 50S ribosomal protein L14                                       |
| B2L_0774 | 9174            | 36111            | 0.3                            | 168         | Hsp20-family heat shock chaperone                               |
| B2L_0155 | 8357            | 9709             | 0.9                            | 103         | 30S ribosomal protein S10                                       |
| B2L_0180 | 7719            | 7628             | 1                              | 126         | SSU ribosomal protein S13P                                      |
| B2L_0320 | 7560            | 6456             | 1.2                            | 71          | LSU ribosomal protein L31P                                      |
| B2L_0877 | 7124            | 8334             | 0.9                            | 376         | <b>ATP-binding protein of ABC transporter system for sugars</b> |
| B2L_0067 | 6889            | 9554             | 0.7                            | 144         | LSU ribosomal protein L11P                                      |
| B2L_0677 | 6150            | 4528             | 1.4                            | 87          | Phosphocarrier protein HPr                                      |
| B2L_0818 | 5986            | 4590             | 1.3                            | 188         | Alkyl hydroperoxide reductase C22 protein                       |
| B2L_1771 | 5889            | 2509             | 2.3                            | 173         | Transcriptional regulator                                       |
| B2L_0119 | 5571            | 5700             | 1                              | 98          | 10 kDa chaperonin GROES                                         |
| B2L_0167 | 5546            | 9016             | 0.6                            | 112         | 50S ribosomal protein L24                                       |
| B2L_0142 | 5399            | 9388             | 0.6                            | 164         | 30S ribosomal protein S9                                        |
| B2L_0822 | 4965            | 3577             | 1.4                            | 160         | Hypothetical protein in DPS family                              |
| B2L_0947 | 4944            | 3047             | 1.6                            | 124         | SSU ribosomal protein S12P                                      |
| B2L_1638 | 4827            | 6200             | 0.8                            | 280         | SSU ribosomal protein S2P                                       |
| B2L_0200 | 4698            | 2193             | 2.1                            | 144         | Rrf2 family protein                                             |
| B2L_1406 | 4690            | 2849             | 1.6                            | 792         | Formate acetyltransferase                                       |
| B2L_0120 | 4588            | 6623             | 0.7                            | 56          | LSU ribosomal protein L33P                                      |
| B2L_0224 | 4379            | 4092             | 1.1                            | 257         | Phosphoglycerate mutase                                         |
| B2L_0168 | 4250            | 10550            | 0.4                            | 191         | 50S ribosomal protein L5                                        |
| B2L_1823 | 4169            | 2787             | 1.5                            | 353         | Glyceraldehyde 3-phosphate dehydrogenase                        |
| B2L_1272 | 4012            | 3183             | 1.3                            | 210         | LSU ribosomal protein L25P                                      |
| B2L_0174 | 3694            | 11175            | 0.3                            | 62          | 50S ribosomal protein L30                                       |
| B2L_0109 | 3679            | 9569             | 0.4                            | 174         | LSU ribosomal protein L10P                                      |
| B2L_1310 | 3647            | 5489             | 0.7                            | 209         | SSU ribosomal protein S4P                                       |
| B2L_1417 | 3622            | 6116             | 0.6                            | 826         | Xylulose-5-phosphate/Fructose-6-phosphate phosphoketolase       |
| B2L_1767 | 3561            | 3798             | 0.9                            | 221         | Ribosome-associated factor Y                                    |
| B2L_0160 | 3248            | 7761             | 0.4                            | 93          | 30S ribosomal protein S19                                       |
| B2L_0727 | 3215            | 2837             | 1.1                            | 627         | Chaperone protein dnaK                                          |

|          |      |       |     |     |                                                                                    |
|----------|------|-------|-----|-----|------------------------------------------------------------------------------------|
| B2L_0420 | 3185 | 1618  | 2   | 80  | Cold shock protein                                                                 |
| B2L_0158 | 3169 | 9259  | 0.3 | 99  | 50S ribosomal protein L23                                                          |
| B2L_1238 | 3122 | 1867  | 1.7 | 318 | Choloylglycine hydrolase                                                           |
| B2L_0626 | 3034 | 6646  | 0.5 | 97  | SSU ribosomal protein S6P                                                          |
| B2L_0726 | 2915 | 2552  | 1.1 | 228 | GrpE protein                                                                       |
| B2L_1455 | 2905 | 5476  | 0.5 | 492 | SSU ribosomal protein S1P                                                          |
| B2L_0170 | 2900 | 7830  | 0.4 | 133 | 30S ribosomal protein S8                                                           |
| B2L_0156 | 2886 | 6171  | 0.5 | 214 | 50S ribosomal protein L3                                                           |
| B2L_0058 | 2871 | 1937  | 1.5 | 103 | LSU ribosomal protein L21P                                                         |
| B2L_1143 | 2818 | 3460  | 0.8 | 122 | LSU ribosomal protein L19P                                                         |
| B2L_0305 | 2773 | 1814  | 1.5 | 188 | Hypoxanthine-guanine phosphoribosyltransferase                                     |
| B2L_0795 | 2669 | 1988  | 1.3 | 128 | hypothetical protein                                                               |
| B2L_1206 | 2656 | 2203  | 1.2 | 368 | Transaldolase                                                                      |
| B2L_1268 | 2588 | 3429  | 0.8 | 87  | SSU ribosomal protein S20P                                                         |
| B2L_1864 | 2566 | 2767  | 0.9 | 321 | L-lactate dehydrogenase                                                            |
| B2L_0495 | 2544 | 2965  | 0.9 | 449 | <b>ABC transporter solute-binding protein, family 1</b>                            |
| B2L_0581 | 2481 | 2065  | 1.2 | 544 | ATP synthase alpha chain                                                           |
| B2L_1819 | 2425 | 3615  | 0.7 | 267 | Bacterial Protein Translation Initiation Factor 3 (IF-3)                           |
| B2L_0110 | 2409 | 15731 | 0.2 | 127 | LSU ribosomal protein L12P (L7/L12)                                                |
| B2L_0059 | 2357 | 1805  | 1.3 | 84  | LSU ribosomal protein L27P                                                         |
| B2L_0157 | 2330 | 6772  | 0.3 | 219 | 50S ribosomal protein L4                                                           |
| B2L_0181 | 2314 | 3911  | 0.6 | 133 | SSU ribosomal protein S11P                                                         |
| B2L_0182 | 2256 | 3186  | 0.7 | 332 | DNA-directed RNA polymerase alpha chain                                            |
| B2L_0578 | 2233 | 2004  | 1.1 | 98  | ATP synthase epsilon chain                                                         |
| B2L_0169 | 2180 | 8145  | 0.3 | 62  | 30S ribosomal protein S14-1                                                        |
| B2L_0787 | 2161 | 762   | 2.8 | 154 | Hypothetical membrane spanning protein in uncharacterized protein family (UPF0233) |
| B2L_0868 | 2145 | 1735  | 1.2 | 167 | NrdI protein                                                                       |
| B2L_0087 | 2139 | 3309  | 0.6 | 65  | LSU ribosomal protein L28P                                                         |
| B2L_0165 | 2109 | 4637  | 0.5 | 87  | 30S ribosomal protein S17                                                          |
| B2L_0585 | 2103 | 1110  | 1.9 | 270 | ATP synthase A chain                                                               |
| B2L_0068 | 2099 | 5979  | 0.4 | 231 | LSU ribosomal protein L1P                                                          |
| B2L_0171 | 2098 | 3320  | 0.6 | 180 | 50S ribosomal protein L6                                                           |
| B2L_0589 | 2062 | 1960  | 1.1 | 165 | Inorganic pyrophosphatase                                                          |
| B2L_1588 | 2057 | 1878  | 1.1 | 188 | Protein Translation Elongation Factor P (EF-P)                                     |
| B2L_1744 | 2056 | 686   | 3   | 98  | hypothetical protein                                                               |
| B2L_0867 | 2014 | 1130  | 1.8 | 89  | Glutaredoxin nrdH                                                                  |
| B2L_0580 | 2002 | 2566  | 0.8 | 308 | ATP synthase gamma chain                                                           |
| B2L_0584 | 1953 | 1308  | 1.5 | 77  | ATP synthase C chain                                                               |
| B2L_0421 | 1895 | 4241  | 0.4 | 542 | 60 kDa chaperonin GroEL                                                            |
| B2L_0161 | 1823 | 3688  | 0.5 | 120 | 50S ribosomal protein L22                                                          |
| B2L_0996 | 1818 | 1066  | 1.7 | 393 | putative membrane spanning protein                                                 |
| B2L_0103 | 1810 | 140   | 13  | 377 | Phosphate-binding protein                                                          |

|          |      |      |      |     |                                                             |
|----------|------|------|------|-----|-------------------------------------------------------------|
| B2L_0173 | 1782 | 5124 | 0.3  | 243 | 30S ribosomal protein S5                                    |
| B2L_0207 | 1777 | 7152 | 0.2  | 439 | <b>extracellular solute-binding protein, family 1</b>       |
| B2L_0624 | 1777 | 6645 | 0.3  | 83  | SSU ribosomal protein S18P                                  |
| B2L_1005 | 1741 | 973  | 1.8  | 165 | Autoinducer-2 production protein luxS                       |
| B2L_0159 | 1707 | 3156 | 0.5  | 277 | 50S ribosomal protein L2                                    |
| B2L_1818 | 1699 | 1374 | 1.2  | 65  | LSU ribosomal protein L35P                                  |
| B2L_0175 | 1683 | 5447 | 0.3  | 151 | 50S ribosomal protein L15                                   |
| B2L_1861 | 1674 | 146  | 11.5 | 128 | LysM domain protein                                         |
| B2L_0583 | 1573 | 456  | 3.4  | 173 | ATP synthase B chain                                        |
| B2L_0579 | 1559 | 2028 | 0.8  | 491 | ATP synthase beta chain                                     |
| B2L_1828 | 1556 | 1578 | 1    | 103 | hypothetical protein                                        |
| B2L_0354 | 1555 | 672  | 2.3  | 803 | Anaerobic ribonucleoside-triphosphate reductase             |
| B2L_0625 | 1541 | 5183 | 0.3  | 215 | Single-strand DNA binding protein                           |
| B2L_1451 | 1541 | 1406 | 1.1  | 481 | Pyruvate kinase                                             |
| B2L_1027 | 1538 | 520  | 3    | 159 | SsrA-binding protein                                        |
| B2L_0203 | 1526 | 2234 | 0.7  | 697 | <b>PTS system, fructose/glucose-specific IIBC component</b> |
| B2L_1116 | 1497 | 2550 | 0.6  | 166 | SSU ribosomal protein S16P                                  |
| B2L_0172 | 1489 | 4909 | 0.3  | 124 | 50S ribosomal protein L18                                   |
| B2L_0243 | 1464 | 829  | 1.8  | 442 | <b>family 1 extracellular solute-binding protein</b>        |

**Table S2:** The 100 most over-expressed genes in *B. breve* 2L cultivated in MRS +CG respect to *B. breve* 2L grown in MRS, sorted by CG expression induction (CG/MRS).

| ORFs     | CG average RPKM | MRS average RPKM | CG expression induction CG/MRS | Length (aa) | Annotation                                                                   |
|----------|-----------------|------------------|--------------------------------|-------------|------------------------------------------------------------------------------|
| B2L_1430 | 346             | 1                | 571.7                          | 109         | hypothetical protein                                                         |
| B2L_1711 | 126             | 1                | 148.6                          | 542         | mobilization protein                                                         |
| B2L_0714 | 360             | 3                | 111                            | 96          | Hypothetical protein, TadE-like                                              |
| B2L_0148 | 201             | 2                | 106                            | 446         | <b>D-arabitol membrane transporter</b>                                       |
| B2L_1705 | 252             | 3                | 100.4                          | 144         | hypothetical protein                                                         |
| B2L_1706 | 426             | 5                | 94.7                           | 101         | hypothetical protein                                                         |
| B2L_0712 | 287             | 4                | 79.4                           | 113         | putative secreted protein                                                    |
| B2L_0718 | 327             | 5                | 72.6                           | 269         | Septum site-determining protein minD, TadZ-like                              |
| B2L_0256 | 259             | 4                | 72.6                           | 135         | mobilization protein                                                         |
| B2L_1759 | 227             | 3                | 72.2                           | 213         | hypothetical protein                                                         |
| B2L_0252 | 116             | 2                | 71.6                           | 203         | hypothetical protein                                                         |
| B2L_1701 | 661             | 12               | 57.3                           | 211         | hypothetical protein                                                         |
| B2L_0257 | 61              | 1                | 52                             | 477         | Relaxase                                                                     |
| B2L_0565 | 229             | 5                | 47.8                           | 313         | <b>Permease protein of ABC transporter system</b>                            |
| B2L_0713 | 155             | 3                | 47.8                           | 125         | TadF-like protein                                                            |
| B2L_1722 | 100             | 2                | 45.9                           | 568         | hypothetical protein                                                         |
| B2L_1723 | 99              | 3                | 38.8                           | 798         | transfer complex protein                                                     |
| B2L_0255 | 103             | 3                | 35.1                           | 123         | hypothetical protein                                                         |
| B2L_0564 | 109             | 3                | 34.5                           | 304         | <b>Permease protein of ABC transporter system</b>                            |
| B2L_0270 | 136             | 4                | 32.9                           | 543         | Hypothetical protein with CHAP and transglycosylase SLT domains              |
| B2L_0258 | 17              | 1                | 32.4                           | 290         | hypothetical protein                                                         |
| B2L_0886 | 160             | 6                | 27.8                           | 287         | putative secreted protein                                                    |
| B2L_1707 | 207             | 8                | 27.2                           | 114         | hypothetical protein                                                         |
| B2L_0269 | 137             | 5                | 26.8                           | 432         | hypothetical protein                                                         |
| B2L_1574 | 655             | 28               | 23.3                           | 56          | Cystathionine beta-lyase                                                     |
| B2L_1389 | 126             | 6                | 22.9                           | 512         | ATPase                                                                       |
| B2L_1328 | 92              | 4                | 22.8                           | 296         | cation-transporting P-type ATPase                                            |
| B2L_1424 | 122             | 5                | 22.4                           | 487         | Transposase                                                                  |
| B2L_0948 | 162             | 7                | 21.8                           | 218         | Transporter, Sodium/bile acid symporter family, macrolide-resistance protein |
| B2L_0271 | 188             | 9                | 20.6                           | 792         | transfer complex protein                                                     |
| B2L_0398 | 79              | 4                | 20.4                           | 143         | Nitrogen regulatory IIA (Enzyme IIA-NTR)                                     |
| B2L_1421 | 181             | 9                | 19.8                           | 185         | hypothetical protein                                                         |
| B2L_1429 | 117             | 6                | 19.3                           | 911         | putative type III restriction system endonuclease                            |
| B2L_0259 | 52              | 3                | 18.7                           | 335         | hypothetical protein                                                         |
| B2L_1751 | 369             | 20               | 18.7                           | 87          | hypothetical protein                                                         |
| B2L_1781 | 160             | 9                | 18.5                           | 220         | Transcriptional regulatory protein                                           |
| B2L_1667 | 181             | 10               | 18.2                           | 569         | ComE operon protein 3                                                        |

|          |       |     |      |     |                                                                                                      |
|----------|-------|-----|------|-----|------------------------------------------------------------------------------------------------------|
| B2L_1581 | 745   | 41  | 18   | 154 | Hypothetical protein, very proline rich                                                              |
| B2L_1431 | 97    | 5   | 17.8 | 73  | hypothetical protein                                                                                 |
| B2L_1313 | 626   | 36  | 17.4 | 132 | putative membrane spanning protein                                                                   |
| B2L_0399 | 153   | 9   | 16.8 | 157 | <b>PTS system, fructose-like IIA component</b>                                                       |
| B2L_0517 | 359   | 22  | 16.6 | 578 | <b>extracellular solute-binding protein</b>                                                          |
| B2L_0970 | 15117 | 922 | 16.4 | 114 | Ferric uptake regulation protein                                                                     |
| B2L_0273 | 68    | 4   | 16   | 282 | putative membrane spanning protein                                                                   |
| B2L_0402 | 229   | 14  | 15.9 | 239 | Ribulose-phosphate 3-epimerase                                                                       |
| B2L_0463 | 432   | 28  | 15.6 | 442 | <b>Sucrose permease</b>                                                                              |
| B2L_0563 | 125   | 8   | 15.6 | 438 | <b>ATP-binding protein of ABC transporter system</b>                                                 |
| B2L_0731 | 317   | 21  | 15.4 | 307 | <b>Maltose transport system permease protein malG</b>                                                |
| B2L_0717 | 32    | 2   | 15.2 | 340 | hypothetical protein                                                                                 |
| B2L_0716 | 40    | 3   | 14.9 | 149 | putative membrane spanning protein, TadB-like protein                                                |
| B2L_0462 | 282   | 19  | 14.6 | 519 | <b>Beta-fructofuranosidase</b>                                                                       |
| B2L_1731 | 76    | 5   | 14.5 | 222 | plasmid partition protein ParA                                                                       |
| B2L_1388 | 246   | 17  | 14.4 | 125 | Endonuclease                                                                                         |
| B2L_0603 | 141   | 10  | 14   | 80  | transposase                                                                                          |
| B2L_0732 | 144   | 10  | 14   | 467 | <b>Maltodextrin transport system permease protein malC</b>                                           |
| B2L_1086 | 179   | 13  | 13.8 | 251 | Sulfatase family protein                                                                             |
| B2L_0253 | 97    | 7   | 13   | 526 | Chromosome partitioning protein parB                                                                 |
| B2L_0103 | 1810  | 140 | 13   | 377 | Phosphate-binding protein                                                                            |
| B2L_1716 | 78    | 6   | 12.6 | 611 | TraG family protein                                                                                  |
| B2L_0397 | 47    | 4   | 12.2 | 498 | Transcription antiterminator, BglG family                                                            |
| B2L_0734 | 126   | 10  | 12.2 | 629 | <b>Alpha-glucosidase</b>                                                                             |
| B2L_0555 | 238   | 20  | 12.1 | 367 | <b>putative ABC transporter, permease protein</b>                                                    |
| B2L_1704 | 49    | 4   | 12   | 741 | DNA topoisomerase III                                                                                |
| B2L_1712 | 63    | 5   | 11.8 | 358 | hypothetical protein                                                                                 |
| B2L_1861 | 1674  | 146 | 11.5 | 128 | LysM domain protein                                                                                  |
| B2L_1721 | 39    | 3   | 11.4 | 180 | hypothetical protein                                                                                 |
| B2L_0016 | 110   | 10  | 11.2 | 675 | hypothetical protein                                                                                 |
| B2L_1419 | 207   | 19  | 11.1 | 138 | putative transcriptional regulator                                                                   |
| B2L_1713 | 65    | 6   | 10.8 | 673 | hypothetical protein                                                                                 |
| B2L_0260 | 73    | 7   | 10.8 | 383 | hypothetical protein                                                                                 |
| B2L_1390 | 94    | 9   | 10.8 | 540 | Smf protein                                                                                          |
| B2L_1653 | 130   | 12  | 10.5 | 365 | <b>ABC transporter ATP-binding protein</b>                                                           |
| B2L_0650 | 465   | 46  | 10.2 | 875 | putative membrane spanning protein                                                                   |
| B2L_1738 | 322   | 32  | 10   | 238 | hypothetical protein                                                                                 |
| B2L_0247 | 104   | 10  | 9.9  | 494 | <b>Galactoside symporter family 1 extracellular solute-binding protein of ABC transporter system</b> |
| B2L_1154 | 124   | 13  | 9.8  | 224 |                                                                                                      |
| B2L_0551 | 498   | 51  | 9.7  | 495 | xylulokinase                                                                                         |
| B2L_1439 | 232   | 24  | 9.7  | 225 | hypothetical protein                                                                                 |

|          |     |    |     |      |                                                       |
|----------|-----|----|-----|------|-------------------------------------------------------|
| B2L_1088 | 214 | 22 | 9.7 | 304  | <b>Permease of ABC transporter for sugars</b>         |
| B2L_1724 | 78  | 8  | 9.5 | 117  | hypothetical protein                                  |
| B2L_1247 | 177 | 19 | 9.4 | 245  | Transcriptional activator tenA                        |
| B2L_0552 | 615 | 67 | 9.2 | 345  | <b>ABC transporter, permease protein</b>              |
| B2L_1740 | 682 | 74 | 9.2 | 74   | hypothetical protein                                  |
| B2L_0263 | 65  | 7  | 9.1 | 583  | TraG/TraD family                                      |
| B2L_1699 | 187 | 21 | 9   | 145  | hypothetical protein                                  |
| B2L_0401 | 63  | 7  | 9   | 373  | <b>PTS system, fructose-like enzyme IIC component</b> |
| B2L_0250 | 178 | 20 | 8.9 | 322  | Integrase protein                                     |
| B2L_0515 | 138 | 16 | 8.8 | 333  | Oligopeptide transport system permease protein oppC   |
| B2L_1044 | 89  | 10 | 8.8 | 430  | Hypothetical protein with DUF58 domain                |
| B2L_0549 | 271 | 31 | 8.8 | 104  | putative secreted protein                             |
| B2L_1736 | 353 | 40 | 8.7 | 52   | hypothetical protein                                  |
| B2L_0318 | 182 | 21 | 8.6 | 264  | hypothetical protein                                  |
| B2L_0932 | 207 | 25 | 8.3 | 835  | Excinuclease ABC subunit A                            |
| B2L_1352 | 122 | 15 | 8.2 | 535  | <b>Glycogen or amylose phosphorylase</b>              |
| B2L_0743 | 318 | 39 | 8.2 | 456  | <b>Transporter, MFS superfamily</b>                   |
| B2L_1087 | 85  | 10 | 8.1 | 459  | <b>extracellular solute-binding protein, family 1</b> |
| B2L_0689 | 134 | 17 | 8.1 | 50   | N-acetylglucosamine-6-phosphate deacetylase           |
| B2L_0053 | 193 | 24 | 8.1 | 256  | hypothetical protein                                  |
| B2L_0587 | 208 | 27 | 7.6 | 645  | putative secreted protein                             |
| B2L_0284 | 77  | 11 | 7.1 | 1461 | Cell surface protein                                  |

**Table S3:** The most over-expressed genes loci in *B. breve* 2L supplemented with CG respect to *B. breve* 2L in MRS.

| ORFs     | CG average RPKM | MRS average RPKM | CG expression induction CG/MRS | Length (aa) | Annotation                                                      |
|----------|-----------------|------------------|--------------------------------|-------------|-----------------------------------------------------------------|
| B2L_0246 | 99              | 19               | 5.3                            | 1164        | Beta-galactosidase                                              |
| B2L_0247 | 104             | 10               | 9.9                            | 494         | Galactoside symporter                                           |
| B2L_0248 | 188             | 41               | 4.6                            | 88          | Site-specific recombinase                                       |
| B2L_0250 | 178             | 20               | 8.9                            | 322         | Integrase protein                                               |
| B2L_0251 | 175             | 37               | 4.7                            | 222         | hypothetical protein                                            |
| B2L_0252 | 116             | 2                | 71.6                           | 203         | hypothetical protein                                            |
| B2L_0253 | 97              | 7                | 13                             | 526         | Chromosome partitioning protein parB                            |
| B2L_0254 | 13              | 38               | 0.3                            | 109         | hypothetical protein                                            |
| B2L_0255 | 103             | 3                | 35.1                           | 123         | hypothetical protein                                            |
| B2L_0256 | 259             | 4                | 72.6                           | 135         | mobilization protein                                            |
| B2L_0257 | 61              | 1                | 52                             | 477         | Relaxase                                                        |
| B2L_0258 | 17              | 1                | 32.4                           | 290         | hypothetical protein                                            |
| B2L_0259 | 52              | 3                | 18.7                           | 335         | hypothetical protein                                            |
| B2L_0260 | 73              | 7                | 10.8                           | 383         | hypothetical protein                                            |
| B2L_0262 | 31              | 11               | 2.7                            | 127         | hypothetical protein                                            |
| B2L_0263 | 65              | 7                | 9.1                            | 583         | TraG/TraD family                                                |
| B2L_0269 | 137             | 5                | 26.8                           | 432         | hypothetical protein                                            |
| B2L_0270 | 136             | 4                | 32.9                           | 543         | Hypothetical protein with CHAP and transglycosylase SLT domains |
| B2L_0271 | 188             | 9                | 20.6                           | 792         | transfer complex protein                                        |
| B2L_0273 | 68              | 4                | 16                             | 282         | putative membrane spanning protein                              |
| B2L_0275 | 102             | 18               | 5.8                            | 371         | Transposase                                                     |
| B2L_0281 | 269             | 44               | 6.1                            | 180         | putative secreted protein                                       |
| B2L_0282 | 202             | 61               | 3.3                            | 334         | Penicillin acylase, bile salt hydrolase                         |
| B2L_0283 | 426             | 98               | 4.3                            | 262         | Multidrug-efflux transporter 2 regulator                        |
| B2L_0284 | 77              | 11               | 7.1                            | 1461        | Cell surface protein                                            |
| B2L_0397 | 47              | 4                | 12.2                           | 498         | Transcription antiterminator, BglG family                       |
| B2L_0398 | 79              | 4                | 20.4                           | 143         | Nitrogen regulatory IIA (Enzyme IIA-NTR)                        |
| B2L_0399 | 153             | 9                | 16.8                           | 157         | PTS system, fructose-like IIA component                         |
| B2L_0400 | 0               | 6                | 0                              | 104         | PTS system, fructose-like IIB component                         |
| B2L_0401 | 63              | 7                | 9                              | 373         | PTS system, fructose-like enzyme IIC component                  |
| B2L_0402 | 229             | 14               | 15.9                           | 239         | Ribulose-phosphate 3-epimerase                                  |
| B2L_0514 | 71              | 14               | 5.2                            | 328         | Oligopeptide transport system permease protein oppB             |
| B2L_0515 | 138             | 16               | 8.8                            | 333         | Oligopeptide transport system permease protein oppC             |
| B2L_0516 | 171             | 25               | 6.9                            | 713         | Oligopeptide transport ATP-binding protein oppD                 |

|          |     |     |      |     |                                                              |
|----------|-----|-----|------|-----|--------------------------------------------------------------|
| B2L_0517 | 359 | 22  | 16.6 | 578 | extracellular solute-binding protein                         |
| B2L_0549 | 271 | 31  | 8.8  | 104 | putative secreted protein                                    |
| B2L_0550 | 131 | 118 | 1.1  | 433 | putative ROK family protein                                  |
| B2L_0551 | 498 | 51  | 9.7  | 495 | xylulokinase                                                 |
| B2L_0552 | 615 | 67  | 9.2  | 345 | <b>ABC transporter, permease protein</b>                     |
| B2L_0553 | 336 | 50  | 6.7  | 513 | <b>ABC transporter, permease protein</b>                     |
| B2L_0554 | 274 | 39  | 6.9  | 344 | <b>ABC transporter, permease protein</b>                     |
| B2L_0555 | 238 | 20  | 12.1 | 367 | <b>putative ABC transporter, permease protein</b>            |
| B2L_0556 | 512 | 72  | 7.1  | 193 | <b>sugar isomerase (SIS)</b>                                 |
| B2L_0563 | 125 | 8   | 15.6 | 438 | <b>ATP-binding protein of ABC transporter system</b>         |
| B2L_0564 | 109 | 3   | 34.5 | 304 | <b>Permease protein of ABC transporter system</b>            |
| B2L_0565 | 229 | 5   | 47.8 | 313 | <b>Permease protein of ABC transporter system</b>            |
| B2L_0566 | 90  | 14  | 6.6  | 389 | <b>Solute binding protein of ABC transporter system</b>      |
| B2L_0598 | 154 | 48  | 3.2  | 601 | <b>putative alpha-galactosidase</b>                          |
| B2L_0599 | 169 | 53  | 3.2  | 290 | <b>sugar ABC transporter permease</b>                        |
| B2L_0600 | 209 | 66  | 3.2  | 297 | <b>sugar ABC transporter permease</b>                        |
| B2L_0601 | 202 | 78  | 2.6  | 441 | <b>extracellular solute-binding protein</b>                  |
| B2L_0602 | 330 | 357 | 0.9  | 292 | putative transcriptional regulator, AraC family              |
| B2L_0603 | 141 | 10  | 14   | 80  | transposase                                                  |
| B2L_0604 | 194 | 34  | 5.6  | 124 | transposase                                                  |
| B2L_0712 | 287 | 4   | 79.4 | 113 | <b>putative secreted protein</b>                             |
| B2L_0713 | 155 | 3   | 47.8 | 125 | <b>TadF-like protein</b>                                     |
| B2L_0714 | 360 | 3   | 111  | 96  | <b>Hypothetical protein, TadE-like</b>                       |
| B2L_0715 | 3   | 11  | 0.3  | 219 | <b>putative secreted protein, TadC-like protein</b>          |
| B2L_0716 | 40  | 3   | 14.9 | 149 | <b>putative membrane spanning protein, TadB-like protein</b> |
| B2L_0717 | 32  | 2   | 15.2 | 340 | <b>hypothetical protein</b>                                  |
| B2L_0718 | 327 | 5   | 72.6 | 269 | <b>Septum site-determining protein minD, TadZ-like</b>       |
| B2L_0730 | 370 | 64  | 5.8  | 268 | <b>putative membrane spanning protein</b>                    |
| B2L_0731 | 317 | 21  | 15.4 | 307 | <b>Maltose transport system permease protein malG</b>        |
| B2L_0732 | 144 | 10  | 14   | 467 | <b>Maltodextrin transport system permease protein malC</b>   |
| B2L_0733 | 281 | 64  | 4.4  | 414 | <b>Maltose/maltodextrin-binding protein</b>                  |
| B2L_0734 | 126 | 10  | 12.2 | 629 | <b>Alpha-glucosidase</b>                                     |
| B2L_1085 | 146 | 39  | 3.8  | 200 | Sulfatase family protein                                     |
| B2L_1086 | 179 | 13  | 13.8 | 251 | Sulfatase family protein                                     |
| B2L_1087 | 85  | 10  | 8.1  | 459 | <b>extracellular solute-binding protein, family 1</b>        |
| B2L_1088 | 214 | 22  | 9.7  | 304 | <b>Permease of ABC transporter for sugars</b>                |

|          |     |     |       |      |                                                   |
|----------|-----|-----|-------|------|---------------------------------------------------|
| B2L_1089 | 174 | 47  | 3.7   | 325  | <b>Permease of ABC transporter for sugars</b>     |
| B2L_1419 | 207 | 19  | 11.1  | 138  | putative transcriptional regulator                |
| B2L_1420 | 62  | 9   | 7.1   | 183  | Relaxase/mobilization nuclease domain             |
| B2L_1421 | 181 | 9   | 19.8  | 185  | hypothetical protein                              |
| B2L_1422 | 238 | 165 | 1.4   | 387  | hypothetical protein                              |
| B2L_1423 | 690 | 343 | 2     | 220  | hypothetical protein                              |
| B2L_1424 | 122 | 5   | 22.4  | 487  | Transposase                                       |
| B2L_1425 | 65  | 13  | 5     | 169  | IstB domain protein ATP-binding protein           |
| B2L_1427 | 397 | 135 | 3     | 96   | transposase                                       |
| B2L_1429 | 117 | 6   | 19.3  | 911  | putative type III restriction system endonuclease |
| B2L_1430 | 346 | 1   | 571.7 | 109  | hypothetical protein                              |
| B2L_1431 | 97  | 5   | 17.8  | 73   | hypothetical protein                              |
| B2L_1432 | 397 | 57  | 6.9   | 230  | hypothetical protein                              |
| B2L_1688 | 149 | 22  | 6.8   | 1051 | <b>Alpha-mannosidase</b>                          |
| B2L_1689 | 68  | 10  | 7     | 1040 | <b>Alpha-mannosidase</b>                          |
| B2L_1690 | 846 | 161 | 5.3   | 128  | phage integrase family protein                    |
| B2L_1692 | 199 | 83  | 2.4   | 326  | Fic family protein                                |
| B2L_1693 | 149 | 151 | 1     | 438  | hypothetical protein                              |
| B2L_1695 | 152 | 247 | 0.6   | 135  | putative secreted protein                         |
| B2L_1696 | 169 | 65  | 2.6   | 448  | phage integrase family protein                    |
| B2L_1697 | 835 | 395 | 2.1   | 256  | filamentation induced by cAMP protein Fic         |
| B2L_1699 | 187 | 21  | 9     | 145  | hypothetical protein                              |
| B2L_1700 | 102 | 46  | 2.2   | 138  | hypothetical protein                              |
| B2L_1701 | 661 | 12  | 57.3  | 211  | hypothetical protein                              |
| B2L_1704 | 49  | 4   | 12    | 741  | DNA topoisomerase III                             |
| B2L_1705 | 252 | 3   | 100.4 | 144  | hypothetical protein                              |
| B2L_1706 | 426 | 5   | 94.7  | 101  | hypothetical protein                              |
| B2L_1707 | 207 | 8   | 27.2  | 114  | hypothetical protein                              |
| B2L_1708 | 702 | 479 | 1.5   | 86   | hypothetical protein                              |
| B2L_1709 | 982 | 838 | 1.2   | 83   | hypothetical protein                              |
| B2L_1710 | 0   | 3   | 0     | 127  | hypothetical protein                              |
| B2L_1711 | 126 | 1   | 148.6 | 542  | mobilization protein                              |
| B2L_1712 | 63  | 5   | 11.8  | 358  | hypothetical protein                              |
| B2L_1713 | 65  | 6   | 10.8  | 673  | hypothetical protein                              |
| B2L_1716 | 78  | 6   | 12.6  | 611  | TraG family protein                               |
| B2L_1717 | 214 | 117 | 1.8   | 168  | hypothetical protein                              |
| B2L_1718 | 457 | 784 | 0.6   | 320  | adenine-specific DNA methyltransferase            |
| B2L_1719 | 692 | 900 | 0.8   | 488  | hypothetical protein                              |
| B2L_1720 | 192 | 52  | 3.7   | 452  | hypothetical protein                              |
| B2L_1721 | 39  | 3   | 11.4  | 180  | hypothetical protein                              |
| B2L_1722 | 100 | 2   | 45.9  | 568  | hypothetical protein                              |

|          |     |    |      |      |                                    |
|----------|-----|----|------|------|------------------------------------|
| B2L_1723 | 99  | 3  | 38.8 | 798  | transfer complex protein           |
| B2L_1724 | 78  | 8  | 9.5  | 117  | hypothetical protein               |
| B2L_1725 | 34  | 16 | 2.1  | 282  | hypothetical protein               |
| B2L_1726 | 14  | 29 | 0.5  | 78   | putative membrane spanning protein |
| B2L_1727 | 81  | 25 | 3.3  | 1789 | Cell surface protein               |
| B2L_1728 | 81  | 42 | 1.9  | 353  | hypothetical protein               |
| B2L_1729 | 147 | 26 | 5.7  | 163  | hypothetical protein               |
| B2L_1730 | 11  | 8  | 1.4  | 94   | hypothetical protein               |
| B2L_1731 | 76  | 5  | 14.5 | 222  | plasmid partition protein ParA     |
| B2L_1732 | 11  | 5  | 2.2  | 166  | hypothetical protein               |
| B2L_1733 | 46  | 7  | 6.8  | 85   | hypothetical protein               |
| B2L_1734 | 159 | 22 | 7    | 89   | hypothetical protein               |
| B2L_1735 | 170 | 43 | 3.9  | 288  | hypothetical protein               |
| B2L_1736 | 353 | 40 | 8.7  | 52   | hypothetical protein               |
| B2L_1737 | 55  | 18 | 3.1  | 64   | hypothetical protein               |
| B2L_1738 | 322 | 32 | 10   | 238  | hypothetical protein               |
| B2L_1739 | 103 | 27 | 3.8  | 123  | hypothetical protein               |
| B2L_1740 | 682 | 74 | 9.2  | 74   | hypothetical protein               |

**Table S4:** 16S rRNA gene microbial profiling quality filtering table.

| Sample Group | Time Point     | Mouse ID | Sample       | Number of sequenced pe reads | Number of pe reads with mean quality > 20 | Number of merged pe reads | Non-bacterial sequences | Length outside bounds of 100 and 400 | Ambiguous bases | Homopolymers > 7 | Mismatch in primers >1 | Reverse primer not found | Final Read Number |
|--------------|----------------|----------|--------------|------------------------------|-------------------------------------------|---------------------------|-------------------------|--------------------------------------|-----------------|------------------|------------------------|--------------------------|-------------------|
| CG           | T <sub>0</sub> | 1        | <b>WT-1A</b> | 66035                        | 18816                                     | 18342                     | 3                       | 0                                    | 0               | 3                | 383                    | 3                        | 17950             |
| CG           | T <sub>1</sub> | 1        | <b>WT-1B</b> | 98615                        | 33864                                     | 32053                     | 8                       | 0                                    | 0               | 19               | 12149                  | 7                        | 19870             |
| CG           | T <sub>2</sub> | 1        | <b>WT-1C</b> | 73988                        | 51454                                     | 49516                     | 2                       | 0                                    | 0               | 23               | 2606                   | 24                       | 46861             |
| CG           | T <sub>3</sub> | 1        | <b>WT-1D</b> | 45607                        | 44227                                     | 43582                     | 16                      | 0                                    | 0               | 4                | 943                    | 17                       | 42602             |
| CG           | T <sub>0</sub> | 2        | <b>WT-2A</b> | 54386                        | 45743                                     | 44896                     | 0                       | 0                                    | 0               | 3                | 917                    | 12                       | 43964             |
| CG           | T <sub>1</sub> | 2        | <b>WT-2B</b> | 98616                        | 89695                                     | 86081                     | 4                       | 0                                    | 1               | 20               | 1711                   | 40                       | 84305             |
| CG           | T <sub>2</sub> | 2        | <b>WT-2C</b> | 82401                        | 44669                                     | 42675                     | 0                       | 0                                    | 1               | 16               | 8428                   | 12                       | 34218             |
| CG           | T <sub>3</sub> | 2        | <b>WT-2D</b> | 73244                        | 65784                                     | 63080                     | 2                       | 0                                    | 2               | 21               | 3926                   | 38                       | 59091             |
| CG           | T <sub>0</sub> | 3        | <b>WT-3A</b> | 86982                        | 37229                                     | 35981                     | 0                       | 0                                    | 0               | 13               | 5065                   | 19                       | 30884             |
| CG           | T <sub>1</sub> | 3        | <b>WT-3B</b> | 92483                        | 71531                                     | 69418                     | 0                       | 0                                    | 0               | 17               | 3495                   | 33                       | 65873             |
| CG           | T <sub>2</sub> | 3        | <b>WT-3C</b> | 14401                        | 688                                       | 640                       | 0                       | 0                                    | 0               | 0                | 384                    | 0                        | 256               |
| CG           | T <sub>3</sub> | 3        | <b>WT-3D</b> | 388903                       | 378255                                    | 370448                    | 19                      | 0                                    | 0               | 53               | 11198                  | 255                      | 358923            |
| CG           | T <sub>0</sub> | 4        | <b>WT-4A</b> | 56149                        | 54106                                     | 52833                     | 0                       | 0                                    | 0               | 6                | 974                    | 19                       | 51834             |
| CG           | T <sub>1</sub> | 4        | <b>WT-4B</b> | 6760                         | 4206                                      | 4112                      | 1                       | 0                                    | 0               | 1                | 146                    | 2                        | 3962              |
| CG           | T <sub>2</sub> | 4        | <b>WT-4C</b> | 75216                        | 37913                                     | 36128                     | 3                       | 0                                    | 0               | 15               | 7349                   | 10                       | 28751             |
| CG           | T <sub>3</sub> | 4        | <b>WT-4D</b> | 36569                        | 34984                                     | 34371                     | 3                       | 0                                    | 0               | 1                | 974                    | 6                        | 33387             |
| CG           | T <sub>0</sub> | 5        | <b>WT-5A</b> | 36637                        | 28152                                     | 27597                     | 3                       | 0                                    | 0               | 7                | 830                    | 9                        | 26748             |
| CG           | T <sub>1</sub> | 5        | <b>WT-5B</b> | 48916                        | 46908                                     | 46165                     | 0                       | 0                                    | 0               | 7                | 875                    | 15                       | 45268             |
| CG           | T <sub>2</sub> | 5        | <b>WT-5C</b> | 78437                        | 56811                                     | 54411                     | 4                       | 0                                    | 0               | 24               | 3239                   | 15                       | 51129             |
| CG           | T <sub>3</sub> | 5        | <b>WT-5D</b> | 91571                        | 86894                                     | 83631                     | 2                       | 0                                    | 2               | 37               | 1326                   | 50                       | 82214             |
| CG           | T <sub>0</sub> | 6        | <b>WT-6A</b> | 50907                        | 49512                                     | 48787                     | 0                       | 0                                    | 0               | 9                | 835                    | 19                       | 47924             |
| CG           | T <sub>1</sub> | 6        | <b>WT-6B</b> | 69118                        | 62624                                     | 60887                     | 5                       | 0                                    | 1               | 11               | 2743                   | 11                       | 58116             |
| CG           | T <sub>2</sub> | 6        | <b>WT-6C</b> | 37208                        | 34806                                     | 33361                     | 2                       | 0                                    | 0               | 12               | 1273                   | 18                       | 32056             |
| CG           | T <sub>3</sub> | 6        | <b>WT-6D</b> | 56051                        | 40839                                     | 39842                     | 4                       | 0                                    | 0               | 12               | 6390                   | 7                        | 33429             |
| CG           | T <sub>0</sub> | 7        | <b>WT-7A</b> | 68553                        | 66253                                     | 63674                     | 7                       | 0                                    | 0               | 28               | 1134                   | 28                       | 62477             |
| CG           | T <sub>1</sub> | 7        | <b>WT-7B</b> | 84075                        | 66572                                     | 63924                     | 6                       | 0                                    | 2               | 24               | 17906                  | 21                       | 45965             |
| CG           | T <sub>2</sub> | 7        | <b>WT-7C</b> | 69716                        | 65421                                     | 62660                     | 6                       | 0                                    | 1               | 16               | 10525                  | 30                       | 52082             |
| CG           | T <sub>3</sub> | 7        | <b>WT-7D</b> | 80578                        | 36532                                     | 35037                     | 4                       | 0                                    | 1               | 7                | 1178                   | 22                       | 33825             |
| CG           | T <sub>0</sub> | 8        | <b>WT-8A</b> | 96574                        | 84202                                     | 80624                     | 4                       | 0                                    | 0               | 26               | 28385                  | 18                       | 52191             |
| CG           | T <sub>1</sub> | 8        | <b>WT-8B</b> | 83792                        | 77204                                     | 73054                     | 7                       | 0                                    | 1               | 25               | 6746                   | 44                       | 66231             |
| CG           | T <sub>2</sub> | 8        | <b>WT-8C</b> | 69987                        | 66827                                     | 64402                     | 2                       | 0                                    | 0               | 13               | 4404                   | 41                       | 59942             |
| CG           | T <sub>3</sub> | 8        | <b>WT-8D</b> | 54056                        | 48084                                     | 46894                     | 1                       | 0                                    | 0               | 13               | 6577                   | 8                        | 40295             |
| Breve2L      | T <sub>0</sub> | 9        | <b>WT-9A</b> | 58274                        | 56973                                     | 56011                     | 1                       | 0                                    | 0               | 9                | 1385                   | 24                       | 54592             |
| Breve2L      | T <sub>1</sub> | 9        | <b>WT-9B</b> | 75468                        | 73286                                     | 70395                     | 2                       | 0                                    | 1               | 21               | 3566                   | 38                       | 66767             |
| Breve2L      | T <sub>2</sub> | 9        | <b>WT-9C</b> | 77640                        | 71922                                     | 68908                     | 5                       | 0                                    | 0               | 21               | 1715                   | 23                       | 67144             |
| Breve2L      | T <sub>3</sub> | 9        | <b>WT-9D</b> | 71572                        | 69344                                     | 66897                     | 1                       | 0                                    | 0               | 19               | 2545                   | 38                       | 64294             |

|            |                |    |               |        |       |       |   |   |   |    |       |    |       |
|------------|----------------|----|---------------|--------|-------|-------|---|---|---|----|-------|----|-------|
| Breve2L    | T <sub>0</sub> | 10 | <b>WT-10A</b> | 40653  | 25414 | 24970 | 0 | 0 | 0 | 5  | 907   | 8  | 24050 |
| Breve2L    | T <sub>1</sub> | 10 | <b>WT-10B</b> | 40673  | 37181 | 36633 | 0 | 0 | 0 | 2  | 669   | 12 | 35950 |
| Breve2L    | T <sub>2</sub> | 10 | <b>WT-10C</b> | 76059  | 70649 | 68022 | 6 | 0 | 1 | 17 | 4706  | 24 | 63268 |
| Breve2L    | T <sub>3</sub> | 10 | <b>WT-10D</b> | 43732  | 41013 | 40444 | 1 | 0 | 0 | 4  | 959   | 10 | 39470 |
| Breve2L    | T <sub>0</sub> | 11 | <b>WT-11A</b> | 47837  | 46397 | 45640 | 1 | 0 | 0 | 5  | 1104  | 12 | 44518 |
| Breve2L    | T <sub>1</sub> | 11 | <b>WT-11B</b> | 45754  | 42486 | 41801 | 1 | 0 | 0 | 6  | 1005  | 8  | 40781 |
| Breve2L    | T <sub>2</sub> | 11 | <b>WT-11C</b> | 59288  | 49456 | 47199 | 3 | 0 | 1 | 14 | 17190 | 8  | 29982 |
| Breve2L    | T <sub>3</sub> | 11 | <b>WT-11D</b> | 85559  | 82354 | 78987 | 5 | 0 | 1 | 24 | 1750  | 41 | 77166 |
| Breve2L    | T <sub>0</sub> | 12 | <b>WT-12A</b> | 67438  | 60819 | 58543 | 3 | 0 | 1 | 21 | 1702  | 23 | 56793 |
| Breve2L    | T <sub>1</sub> | 12 | <b>WT-12B</b> | 82596  | 79980 | 76668 | 3 | 0 | 0 | 19 | 9945  | 36 | 66665 |
| Breve2L    | T <sub>2</sub> | 12 | <b>WT-12C</b> | 80399  | 59881 | 57674 | 3 | 0 | 0 | 35 | 2233  | 20 | 55383 |
| Breve2L    | T <sub>3</sub> | 12 | <b>WT-12D</b> | 82495  | 44645 | 43157 | 3 | 0 | 0 | 44 | 16292 | 2  | 26816 |
| Breve2L    | T <sub>0</sub> | 13 | <b>WT-13A</b> | 31999  | 30773 | 30298 | 0 | 0 | 0 | 3  | 668   | 6  | 29621 |
| Breve2L    | T <sub>1</sub> | 13 | <b>WT-13B</b> | 47635  | 45345 | 44601 | 0 | 0 | 0 | 5  | 845   | 11 | 43740 |
| Breve2L    | T <sub>2</sub> | 13 | <b>WT-13C</b> | 67693  | 41807 | 40994 | 0 | 0 | 0 | 7  | 3286  | 11 | 37690 |
| Breve2L    | T <sub>3</sub> | 13 | <b>WT-13D</b> | 67327  | 60704 | 59094 | 1 | 0 | 0 | 6  | 8652  | 21 | 50414 |
| Breve2L    | T <sub>0</sub> | 14 | <b>WT-14A</b> | 79958  | 70556 | 67890 | 2 | 0 | 2 | 15 | 4750  | 37 | 63084 |
| Breve2L    | T <sub>1</sub> | 14 | <b>WT-14B</b> | 44561  | 43290 | 42629 | 0 | 0 | 0 | 7  | 784   | 10 | 41828 |
| Breve2L    | T <sub>2</sub> | 14 | <b>WT-14C</b> | 68888  | 63064 | 60639 | 0 | 0 | 2 | 15 | 2608  | 25 | 57989 |
| Breve2L    | T <sub>3</sub> | 14 | <b>WT-14D</b> | 60063  | 57380 | 56534 | 1 | 0 | 0 | 8  | 1403  | 13 | 55109 |
| Breve2L    | T <sub>0</sub> | 15 | <b>WT-15A</b> | 73127  | 65361 | 63275 | 5 | 0 | 0 | 20 | 7914  | 31 | 55305 |
| Breve2L    | T <sub>1</sub> | 15 | <b>WT-15B</b> | 38841  | 37855 | 37258 | 0 | 0 | 0 | 3  | 831   | 16 | 36408 |
| Breve2L    | T <sub>2</sub> | 15 | <b>WT-15C</b> | 72741  | 63848 | 61722 | 7 | 0 | 1 | 15 | 3685  | 26 | 57988 |
| Breve2L    | T <sub>3</sub> | 15 | <b>WT-15D</b> | 45916  | 42421 | 41833 | 5 | 0 | 0 | 7  | 971   | 17 | 40833 |
| Breve2L    | T <sub>0</sub> | 16 | <b>WT-16A</b> | 42058  | 41437 | 40777 | 2 | 0 | 0 | 15 | 964   | 26 | 39770 |
| Breve2L    | T <sub>1</sub> | 16 | <b>WT-16B</b> | 50832  | 50293 | 49521 | 2 | 0 | 0 | 9  | 1037  | 20 | 48453 |
| Breve2L    | T <sub>2</sub> | 16 | <b>WT-16C</b> | 72101  | 64092 | 61830 | 3 | 0 | 1 | 16 | 2356  | 25 | 59429 |
| Breve2L    | T <sub>3</sub> | 16 | <b>WT-16D</b> | 58222  | 15314 | 14818 | 0 | 0 | 0 | 3  | 3822  | 6  | 10987 |
| CG+Breve2L | T <sub>0</sub> | 17 | <b>WT-17A</b> | 63236  | 57536 | 55977 | 1 | 0 | 0 | 19 | 3423  | 27 | 52507 |
| CG+Breve2L | T <sub>1</sub> | 17 | <b>WT-17B</b> | 88868  | 22177 | 20640 | 7 | 0 | 0 | 4  | 9353  | 4  | 11272 |
| CG+Breve2L | T <sub>2</sub> | 17 | <b>WT-17C</b> | 63726  | 57768 | 55622 | 2 | 0 | 1 | 25 | 5419  | 33 | 50142 |
| CG+Breve2L | T <sub>3</sub> | 17 | <b>WT-17D</b> | 60263  | 58194 | 57418 | 1 | 0 | 0 | 6  | 1407  | 19 | 55985 |
| CG+Breve2L | T <sub>0</sub> | 18 | <b>WT-18A</b> | 48706  | 47362 | 46621 | 0 | 0 | 0 | 8  | 1004  | 15 | 45594 |
| CG+Breve2L | T <sub>1</sub> | 18 | <b>WT-18B</b> | 64647  | 55263 | 52913 | 6 | 0 | 1 | 35 | 5014  | 17 | 47840 |
| CG+Breve2L | T <sub>2</sub> | 18 | <b>WT-18C</b> | 100580 | 68180 | 65442 | 2 | 0 | 1 | 30 | 6154  | 30 | 59225 |
| CG+Breve2L | T <sub>3</sub> | 18 | <b>WT-18D</b> | 68705  | 48962 | 48133 | 3 | 0 | 0 | 5  | 2294  | 11 | 45820 |
| CG+Breve2L | T <sub>0</sub> | 19 | <b>WT-19A</b> | 97380  | 56292 | 53992 | 3 | 0 | 1 | 31 | 5018  | 23 | 48916 |
| CG+Breve2L | T <sub>1</sub> | 19 | <b>WT-19B</b> | 79803  | 31190 | 29799 | 3 | 0 | 0 | 9  | 5767  | 11 | 24009 |
| CG+Breve2L | T <sub>2</sub> | 19 | <b>WT-19C</b> | 100801 | 34012 | 32276 | 9 | 0 | 0 | 10 | 3001  | 14 | 29242 |
| CG+Breve2L | T <sub>3</sub> | 19 | <b>WT-19D</b> | 53220  | 49302 | 48580 | 3 | 0 | 0 | 11 | 1228  | 17 | 47321 |
| CG+Breve2L | T <sub>0</sub> | 20 | <b>WT-20A</b> | 49572  | 48882 | 48015 | 3 | 0 | 0 | 7  | 959   | 6  | 47040 |
| CG+Breve2L | T <sub>1</sub> | 20 | <b>WT-20B</b> | 68842  | 67123 | 64658 | 2 | 0 | 1 | 15 | 3316  | 26 | 61298 |
| CG+Breve2L | T <sub>2</sub> | 20 | <b>WT-20C</b> | 98311  | 27120 | 25671 | 2 | 0 | 0 | 15 | 8596  | 12 | 17046 |
| CG+Breve2L | T <sub>3</sub> | 20 | <b>WT-20D</b> | 68057  | 60312 | 58165 | 0 | 0 | 1 | 12 | 1778  | 25 | 56349 |
| CG+Breve2L | T <sub>0</sub> | 21 | <b>WT-21A</b> | 65884  | 51767 | 49755 | 4 | 0 | 0 | 17 | 1375  | 23 | 48336 |

|            |                |    |               |        |       |       |    |   |   |    |       |    |       |
|------------|----------------|----|---------------|--------|-------|-------|----|---|---|----|-------|----|-------|
| CG+Breve2L | T <sub>1</sub> | 21 | <b>WT-21B</b> | 80559  | 72085 | 69126 | 3  | 0 | 4 | 22 | 6779  | 33 | 62285 |
| CG+Breve2L | T <sub>2</sub> | 21 | <b>WT-21C</b> | 122242 | 37388 | 36389 | 0  | 0 | 0 | 9  | 6299  | 6  | 30075 |
| CG+Breve2L | T <sub>3</sub> | 21 | <b>WT-21D</b> | 59304  | 56314 | 55236 | 1  | 0 | 0 | 7  | 2574  | 18 | 52636 |
| CG+Breve2L | T <sub>0</sub> | 22 | <b>WT-22A</b> | 34663  | 33456 | 32966 | 3  | 0 | 0 | 4  | 646   | 6  | 32307 |
| CG+Breve2L | T <sub>1</sub> | 22 | <b>WT-22B</b> | 73540  | 31130 | 29934 | 4  | 0 | 1 | 11 | 2181  | 5  | 27732 |
| CG+Breve2L | T <sub>2</sub> | 22 | <b>WT-22C</b> | 82779  | 43818 | 41480 | 7  | 0 | 1 | 21 | 9654  | 21 | 31776 |
| CG+Breve2L | T <sub>3</sub> | 22 | <b>WT-22D</b> | 69278  | 67414 | 64789 | 2  | 0 | 1 | 21 | 2362  | 42 | 62361 |
| CG+Breve2L | T <sub>0</sub> | 23 | <b>WT-23A</b> | 71319  | 37955 | 36325 | 3  | 0 | 3 | 20 | 6721  | 6  | 29572 |
| CG+Breve2L | T <sub>1</sub> | 23 | <b>WT-23B</b> | 74124  | 51526 | 49143 | 10 | 0 | 1 | 19 | 17554 | 13 | 31546 |
| CG+Breve2L | T <sub>2</sub> | 23 | <b>WT-23C</b> | 55717  | 19363 | 18944 | 0  | 0 | 0 | 20 | 1342  | 2  | 17580 |
| CG+Breve2L | T <sub>3</sub> | 23 | <b>WT-23D</b> | 63689  | 57747 | 56798 | 5  | 0 | 0 | 3  | 2967  | 19 | 53804 |
| CG+Breve2L | T <sub>0</sub> | 24 | <b>WT-24A</b> | 39593  | 38884 | 38260 | 1  | 0 | 0 | 4  | 977   | 18 | 37260 |
| CG+Breve2L | T <sub>1</sub> | 24 | <b>WT-24B</b> | 72335  | 60879 | 58485 | 5  | 0 | 0 | 10 | 4836  | 18 | 53616 |
| CG+Breve2L | T <sub>2</sub> | 24 | <b>WT-24C</b> | 46807  | 19559 | 19112 | 1  | 0 | 0 | 0  | 1300  | 7  | 17804 |
| CG+Breve2L | T <sub>3</sub> | 24 | <b>WT-24D</b> | 74482  | 45140 | 44184 | 0  | 0 | 0 | 6  | 5871  | 10 | 38297 |

**Table S5:** Bifidobacterial ITS profiling quality filtering table.

| Sample Group | Time Point     | Mouse ID | Sample       | Number of sequenced pe reads | Number of pe reads with mean quality > 20 | Number of merged pe reads | Non-bacterial sequences | Length outside bounds of 100 and 400 | Ambiguous bases | Homopolymers > 7 | Mismatch in primers >1 | Reverse primer not found | Final Read Number |
|--------------|----------------|----------|--------------|------------------------------|-------------------------------------------|---------------------------|-------------------------|--------------------------------------|-----------------|------------------|------------------------|--------------------------|-------------------|
| CG           | T <sub>0</sub> | 1        | <b>WT-1A</b> | 66035                        | 18876                                     | 18379                     | 3                       | 0                                    | 0               | 3                | 18339                  | 0                        | 34                |
| CG           | T <sub>1</sub> | 1        | <b>WT-1B</b> | 98615                        | 34299                                     | 32444                     | 8                       | 0                                    | 0               | 19               | 20369                  | 31                       | 12017             |
| CG           | T <sub>2</sub> | 1        | <b>WT-1C</b> | 73988                        | 51760                                     | 49788                     | 2                       | 0                                    | 0               | 22               | 47801                  | 6                        | 1957              |
| CG           | T <sub>3</sub> | 1        | <b>WT-1D</b> | 45607                        | 44248                                     | 43591                     | 15                      | 0                                    | 0               | 4                | 43570                  | 0                        | 2                 |
| CG           | T <sub>0</sub> | 2        | <b>WT-2A</b> | 54386                        | 45788                                     | 44931                     | 0                       | 0                                    | 0               | 3                | 44863                  | 0                        | 65                |
| CG           | T <sub>1</sub> | 2        | <b>WT-2B</b> | 98616                        | 89769                                     | 86132                     | 4                       | 0                                    | 1               | 20               | 86034                  | 1                        | 72                |
| CG           | T <sub>2</sub> | 2        | <b>WT-2C</b> | 82401                        | 45412                                     | 43362                     | 0                       | 0                                    | 1               | 16               | 35016                  | 18                       | 8311              |
| CG           | T <sub>3</sub> | 2        | <b>WT-2D</b> | 73244                        | 65894                                     | 63166                     | 2                       | 0                                    | 2               | 21               | 60367                  | 3                        | 2771              |
| CG           | T <sub>0</sub> | 3        | <b>WT-3A</b> | 86982                        | 37379                                     | 36115                     | 0                       | 0                                    | 0               | 13               | 31556                  | 8                        | 4538              |
| CG           | T <sub>1</sub> | 3        | <b>WT-3B</b> | 92483                        | 71691                                     | 69559                     | 0                       | 0                                    | 0               | 17               | 67305                  | 5                        | 2232              |
| CG           | T <sub>2</sub> | 3        | <b>WT-3C</b> | 14401                        | 712                                       | 662                       | 0                       | 0                                    | 0               | 0                | 264                    | 1                        | 397               |
| CG           | T <sub>3</sub> | 3        | <b>WT-3D</b> | 388903                       | 378383                                    | 370507                    | 19                      | 0                                    | 0               | 52               | 370419                 | 0                        | 17                |
| CG           | T <sub>0</sub> | 4        | <b>WT-4A</b> | 56149                        | 54126                                     | 52848                     | 0                       | 0                                    | 0               | 6                | 52833                  | 0                        | 9                 |
| CG           | T <sub>1</sub> | 4        | <b>WT-4B</b> | 6760                         | 4220                                      | 4124                      | 1                       | 0                                    | 0               | 1                | 4043                   | 0                        | 79                |
| CG           | T <sub>2</sub> | 4        | <b>WT-4C</b> | 75216                        | 38348                                     | 36517                     | 3                       | 0                                    | 0               | 16               | 29327                  | 15                       | 7156              |
| CG           | T <sub>3</sub> | 4        | <b>WT-4D</b> | 36569                        | 34990                                     | 34373                     | 2                       | 0                                    | 0               | 1                | 34366                  | 0                        | 4                 |
| CG           | T <sub>0</sub> | 5        | <b>WT-5A</b> | 36637                        | 28179                                     | 27615                     | 3                       | 0                                    | 0               | 7                | 27368                  | 0                        | 237               |
| CG           | T <sub>1</sub> | 5        | <b>WT-5B</b> | 48916                        | 46923                                     | 46173                     | 0                       | 0                                    | 0               | 7                | 46161                  | 0                        | 5                 |
| CG           | T <sub>2</sub> | 5        | <b>WT-5C</b> | 78437                        | 57089                                     | 54647                     | 4                       | 0                                    | 0               | 24               | 52169                  | 4                        | 2446              |
| CG           | T <sub>3</sub> | 5        | <b>WT-5D</b> | 91571                        | 87069                                     | 83778                     | 2                       | 0                                    | 2               | 37               | 83734                  | 0                        | 3                 |
| CG           | T <sub>0</sub> | 6        | <b>WT-6A</b> | 50907                        | 49533                                     | 48799                     | 0                       | 0                                    | 0               | 10               | 48789                  | 0                        | 0                 |
| CG           | T <sub>1</sub> | 6        | <b>WT-6B</b> | 69118                        | 62739                                     | 60988                     | 5                       | 0                                    | 1               | 11               | 59375                  | 4                        | 1592              |
| CG           | T <sub>2</sub> | 6        | <b>WT-6C</b> | 37208                        | 34867                                     | 33415                     | 2                       | 0                                    | 0               | 12               | 32704                  | 1                        | 696               |
| CG           | T <sub>3</sub> | 6        | <b>WT-6D</b> | 56051                        | 40953                                     | 39941                     | 3                       | 0                                    | 0               | 12               | 34265                  | 15                       | 5646              |
| CG           | T <sub>0</sub> | 7        | <b>WT-7A</b> | 68553                        | 66340                                     | 63749                     | 7                       | 0                                    | 0               | 28               | 63709                  | 0                        | 5                 |
| CG           | T <sub>1</sub> | 7        | <b>WT-7B</b> | 84075                        | 67249                                     | 64546                     | 6                       | 0                                    | 2               | 20               | 47062                  | 31                       | 17425             |
| CG           | T <sub>2</sub> | 7        | <b>WT-7C</b> | 69716                        | 65781                                     | 62979                     | 6                       | 0                                    | 1               | 17               | 53370                  | 24                       | 9561              |
| CG           | T <sub>3</sub> | 7        | <b>WT-7D</b> | 80578                        | 36832                                     | 35309                     | 4                       | 0                                    | 1               | 7                | 34440                  | 1                        | 856               |
| CG           | T <sub>0</sub> | 8        | <b>WT-8A</b> | 96574                        | 85440                                     | 81774                     | 4                       | 0                                    | 0               | 25               | 53481                  | 52                       | 28212             |
| CG           | T <sub>1</sub> | 8        | <b>WT-8B</b> | 83792                        | 77585                                     | 73383                     | 7                       | 0                                    | 1               | 25               | 67660                  | 18                       | 5672              |
| CG           | T <sub>2</sub> | 8        | <b>WT-8C</b> | 69987                        | 66990                                     | 64550                     | 2                       | 0                                    | 0               | 12               | 61214                  | 10                       | 3312              |
| CG           | T <sub>3</sub> | 8        | <b>WT-8D</b> | 54056                        | 48141                                     | 46939                     | 1                       | 0                                    | 0               | 13               | 41463                  | 13                       | 5449              |
| Breve2L      | T <sub>0</sub> | 9        | <b>WT-9A</b> | 58274                        | 57001                                     | 56034                     | 1                       | 0                                    | 0               | 9                | 56024                  | 0                        | 0                 |
| Breve2L      | T <sub>1</sub> | 9        | <b>WT-9B</b> | 75468                        | 73341                                     | 70434                     | 2                       | 0                                    | 1               | 21               | 68139                  | 3                        | 2268              |
| Breve2L      | T <sub>2</sub> | 9        | <b>WT-9C</b> | 77640                        | 72101                                     | 69065                     | 5                       | 0                                    | 0               | 21               | 68469                  | 1                        | 569               |
| Breve2L      | T <sub>3</sub> | 9        | <b>WT-9D</b> | 71572                        | 69446                                     | 66973                     | 2                       | 0                                    | 0               | 19               | 65605                  | 6                        | 1341              |

|            |                |    |               |        |       |       |   |   |   |    |       |    |       |
|------------|----------------|----|---------------|--------|-------|-------|---|---|---|----|-------|----|-------|
| Breve2L    | T <sub>0</sub> | 10 | <b>WT-10A</b> | 40653  | 25471 | 25004 | 0 | 0 | 0 | 5  | 24690 | 0  | 309   |
| Breve2L    | T <sub>1</sub> | 10 | <b>WT-10B</b> | 40673  | 37197 | 36643 | 0 | 0 | 0 | 2  | 36621 | 0  | 20    |
| Breve2L    | T <sub>2</sub> | 10 | <b>WT-10C</b> | 76059  | 70819 | 68166 | 6 | 0 | 1 | 15 | 64453 | 3  | 3688  |
| Breve2L    | T <sub>3</sub> | 10 | <b>WT-10D</b> | 43732  | 41020 | 40448 | 1 | 0 | 0 | 4  | 40379 | 0  | 64    |
| Breve2L    | T <sub>0</sub> | 11 | <b>WT-11A</b> | 47837  | 46408 | 45646 | 1 | 0 | 0 | 5  | 45640 | 0  | 0     |
| Breve2L    | T <sub>1</sub> | 11 | <b>WT-11B</b> | 45754  | 42505 | 41815 | 1 | 0 | 0 | 6  | 41646 | 1  | 161   |
| Breve2L    | T <sub>2</sub> | 11 | <b>WT-11C</b> | 59288  | 49716 | 47430 | 3 | 0 | 1 | 14 | 30729 | 16 | 16666 |
| Breve2L    | T <sub>3</sub> | 11 | <b>WT-11D</b> | 85559  | 82388 | 79002 | 5 | 0 | 1 | 24 | 78881 | 0  | 91    |
| Breve2L    | T <sub>0</sub> | 12 | <b>WT-12A</b> | 67438  | 60985 | 58690 | 3 | 0 | 1 | 21 | 57975 | 1  | 689   |
| Breve2L    | T <sub>1</sub> | 12 | <b>WT-12B</b> | 82596  | 80133 | 76799 | 3 | 0 | 0 | 19 | 68027 | 18 | 8732  |
| Breve2L    | T <sub>2</sub> | 12 | <b>WT-12C</b> | 80399  | 60190 | 57938 | 3 | 0 | 0 | 36 | 56605 | 3  | 1291  |
| Breve2L    | T <sub>3</sub> | 12 | <b>WT-12D</b> | 82495  | 44987 | 43474 | 3 | 0 | 0 | 46 | 27629 | 31 | 15765 |
| Breve2L    | T <sub>0</sub> | 13 | <b>WT-13A</b> | 31999  | 30781 | 30302 | 0 | 0 | 0 | 3  | 30296 | 0  | 3     |
| Breve2L    | T <sub>1</sub> | 13 | <b>WT-13B</b> | 47635  | 45354 | 44605 | 0 | 0 | 0 | 5  | 44600 | 0  | 0     |
| Breve2L    | T <sub>2</sub> | 13 | <b>WT-13C</b> | 67693  | 41991 | 41165 | 1 | 0 | 0 | 7  | 38480 | 4  | 2673  |
| Breve2L    | T <sub>3</sub> | 13 | <b>WT-13D</b> | 67327  | 60740 | 59116 | 1 | 0 | 0 | 5  | 51780 | 15 | 7315  |
| Breve2L    | T <sub>0</sub> | 14 | <b>WT-14A</b> | 79958  | 70737 | 68050 | 2 | 0 | 2 | 13 | 64376 | 8  | 3649  |
| Breve2L    | T <sub>1</sub> | 14 | <b>WT-14B</b> | 44561  | 43302 | 42637 | 0 | 0 | 0 | 7  | 42620 | 0  | 10    |
| Breve2L    | T <sub>2</sub> | 14 | <b>WT-14C</b> | 68888  | 63176 | 60740 | 0 | 0 | 2 | 13 | 59304 | 0  | 1421  |
| Breve2L    | T <sub>3</sub> | 14 | <b>WT-14D</b> | 60063  | 57395 | 56546 | 1 | 0 | 0 | 8  | 56381 | 2  | 154   |
| Breve2L    | T <sub>0</sub> | 15 | <b>WT-15A</b> | 73127  | 66097 | 63949 | 5 | 0 | 0 | 19 | 56638 | 5  | 7282  |
| Breve2L    | T <sub>1</sub> | 15 | <b>WT-15B</b> | 38841  | 37864 | 37265 | 0 | 0 | 0 | 3  | 37197 | 2  | 63    |
| Breve2L    | T <sub>2</sub> | 15 | <b>WT-15C</b> | 72741  | 64041 | 61895 | 7 | 0 | 1 | 15 | 59284 | 2  | 2586  |
| Breve2L    | T <sub>3</sub> | 15 | <b>WT-15D</b> | 45916  | 42439 | 41839 | 5 | 0 | 0 | 6  | 41789 | 0  | 39    |
| Breve2L    | T <sub>0</sub> | 16 | <b>WT-16A</b> | 42058  | 41448 | 40786 | 2 | 0 | 0 | 15 | 40769 | 0  | 0     |
| Breve2L    | T <sub>1</sub> | 16 | <b>WT-16B</b> | 50832  | 50305 | 49528 | 2 | 0 | 0 | 9  | 49517 | 0  | 0     |
| Breve2L    | T <sub>2</sub> | 16 | <b>WT-16C</b> | 72101  | 64159 | 61882 | 3 | 0 | 1 | 15 | 60660 | 1  | 1202  |
| Breve2L    | T <sub>3</sub> | 16 | <b>WT-16D</b> | 58222  | 15376 | 14870 | 0 | 0 | 0 | 3  | 11287 | 6  | 3574  |
| CG+Breve2L | T <sub>0</sub> | 17 | <b>WT-17A</b> | 63236  | 57686 | 56111 | 1 | 0 | 0 | 19 | 53627 | 10 | 2454  |
| CG+Breve2L | T <sub>1</sub> | 17 | <b>WT-17B</b> | 88868  | 22821 | 21212 | 7 | 0 | 0 | 3  | 11574 | 25 | 9603  |
| CG+Breve2L | T <sub>2</sub> | 17 | <b>WT-17C</b> | 63726  | 57941 | 55777 | 2 | 0 | 1 | 25 | 51254 | 13 | 4482  |
| CG+Breve2L | T <sub>3</sub> | 17 | <b>WT-17D</b> | 60263  | 58201 | 57420 | 1 | 0 | 0 | 6  | 57320 | 0  | 93    |
| CG+Breve2L | T <sub>0</sub> | 18 | <b>WT-18A</b> | 48706  | 47370 | 46624 | 0 | 0 | 0 | 8  | 46615 | 0  | 1     |
| CG+Breve2L | T <sub>1</sub> | 18 | <b>WT-18B</b> | 64647  | 55448 | 53074 | 6 | 0 | 1 | 35 | 49009 | 7  | 4016  |
| CG+Breve2L | T <sub>2</sub> | 18 | <b>WT-18C</b> | 100580 | 68501 | 65721 | 2 | 0 | 1 | 30 | 60323 | 11 | 5354  |
| CG+Breve2L | T <sub>3</sub> | 18 | <b>WT-18D</b> | 68705  | 49021 | 48177 | 3 | 0 | 0 | 5  | 46937 | 1  | 1231  |
| CG+Breve2L | T <sub>0</sub> | 19 | <b>WT-19A</b> | 97380  | 56758 | 54411 | 3 | 0 | 1 | 31 | 49896 | 9  | 4471  |
| CG+Breve2L | T <sub>1</sub> | 19 | <b>WT-19B</b> | 79803  | 31571 | 30129 | 3 | 0 | 0 | 7  | 24583 | 11 | 5525  |
| CG+Breve2L | T <sub>2</sub> | 19 | <b>WT-19C</b> | 100801 | 34207 | 32412 | 9 | 0 | 0 | 10 | 29829 | 6  | 2558  |
| CG+Breve2L | T <sub>3</sub> | 19 | <b>WT-19D</b> | 53220  | 49324 | 48592 | 3 | 0 | 0 | 11 | 48531 | 0  | 47    |
| CG+Breve2L | T <sub>0</sub> | 20 | <b>WT-20A</b> | 49572  | 48891 | 48021 | 3 | 0 | 0 | 8  | 48010 | 0  | 0     |
| CG+Breve2L | T <sub>1</sub> | 20 | <b>WT-20B</b> | 68842  | 67185 | 64708 | 2 | 0 | 1 | 15 | 62580 | 5  | 2105  |
| CG+Breve2L | T <sub>2</sub> | 20 | <b>WT-20C</b> | 98311  | 27744 | 26223 | 2 | 0 | 0 | 15 | 17465 | 24 | 8717  |
| CG+Breve2L | T <sub>3</sub> | 20 | <b>WT-20D</b> | 68057  | 60460 | 58295 | 0 | 0 | 1 | 11 | 57491 | 1  | 791   |
| CG+Breve2L | T <sub>0</sub> | 21 | <b>WT-21A</b> | 65884  | 51934 | 49899 | 4 | 0 | 0 | 16 | 49357 | 0  | 522   |

|            |                |    |               |        |       |       |    |   |   |    |       |    |       |
|------------|----------------|----|---------------|--------|-------|-------|----|---|---|----|-------|----|-------|
| CG+Breve2L | T <sub>1</sub> | 21 | <b>WT-21B</b> | 80559  | 72372 | 69388 | 3  | 0 | 4 | 22 | 63686 | 12 | 5661  |
| CG+Breve2L | T <sub>2</sub> | 21 | <b>WT-21C</b> | 122242 | 37689 | 36656 | 0  | 0 | 0 | 9  | 30795 | 15 | 5837  |
| CG+Breve2L | T <sub>3</sub> | 21 | <b>WT-21D</b> | 59304  | 56332 | 55246 | 1  | 0 | 0 | 9  | 54060 | 2  | 1174  |
| CG+Breve2L | T <sub>0</sub> | 22 | <b>WT-22A</b> | 34663  | 33463 | 32967 | 3  | 0 | 0 | 4  | 32959 | 0  | 1     |
| CG+Breve2L | T <sub>1</sub> | 22 | <b>WT-22B</b> | 73540  | 31478 | 30237 | 5  | 0 | 1 | 11 | 28428 | 3  | 1789  |
| CG+Breve2L | T <sub>2</sub> | 22 | <b>WT-22C</b> | 82779  | 44256 | 41862 | 7  | 0 | 1 | 21 | 32448 | 22 | 9363  |
| CG+Breve2L | T <sub>3</sub> | 22 | <b>WT-22D</b> | 69278  | 67516 | 64883 | 2  | 0 | 1 | 22 | 63666 | 1  | 1191  |
| CG+Breve2L | T <sub>0</sub> | 23 | <b>WT-23A</b> | 71319  | 38398 | 36714 | 3  | 0 | 3 | 19 | 30311 | 9  | 6369  |
| CG+Breve2L | T <sub>1</sub> | 23 | <b>WT-23B</b> | 74124  | 52337 | 49905 | 10 | 0 | 1 | 17 | 32407 | 23 | 17447 |
| CG+Breve2L | T <sub>2</sub> | 23 | <b>WT-23C</b> | 55717  | 19551 | 19109 | 0  | 0 | 0 | 21 | 17943 | 4  | 1141  |
| CG+Breve2L | T <sub>3</sub> | 23 | <b>WT-23D</b> | 63689  | 57801 | 56833 | 5  | 0 | 0 | 3  | 55144 | 2  | 1679  |
| CG+Breve2L | T <sub>0</sub> | 24 | <b>WT-24A</b> | 39593  | 38894 | 38263 | 1  | 0 | 0 | 4  | 38258 | 0  | 0     |
| CG+Breve2L | T <sub>1</sub> | 24 | <b>WT-24B</b> | 72335  | 61201 | 58771 | 5  | 0 | 0 | 10 | 54806 | 6  | 3944  |
| CG+Breve2L | T <sub>2</sub> | 24 | <b>WT-24C</b> | 46807  | 19644 | 19191 | 1  | 0 | 0 | 0  | 18180 | 5  | 1005  |
| CG+Breve2L | T <sub>3</sub> | 24 | <b>WT-24D</b> | 74482  | 45334 | 44355 | 0  | 0 | 0 | 6  | 39231 | 12 | 5106  |
